# Supplementary material for: Highly selective synthesis of functionalized polyhydroisoquinoline derivatives via a three-component domino reaction
Source: Royal Society of Chemistry journal article supplement (doi:10.1039/c4cc08900f), 2014-12-03

## Highly selective synthesis of functionalized polyhydroisoquinoline derivatives via three-component domino reaction

Xian Feng, Jian-Jun Wang, Zhan Xun, Juan-Juan Zhang, Zhi-Bin Huang and Da-Qing Shi\*

*Key Laboratory of Organic Synthesis of Jiangsu Province, College of Chemistry, Chemical Engineering and Materials Science, Soochow University, Suzhou 215123, P. R. China*

E-mail: [dqshi@suda.edu.cn](mailto:dqshi@suda.edu.cn)

### Table of Contents

|                                                                                  |            |
|----------------------------------------------------------------------------------|------------|
| <b>1. General methods .....</b>                                                  | <b>S2</b>  |
| <b>2. General procedure for the synthesis of products 4 and 5.....</b>           | <b>S2</b>  |
| <b>3. Characterizations for all compounds.....</b>                               | <b>S3</b>  |
| <b>4. Crystal data of compound 4c and 5c.....</b>                                | <b>S15</b> |
| <b>5. <sup>1</sup>H NMR and <sup>13</sup>C NMR Spectra of all compounds.....</b> | <b>S22</b> |

## 1. Experimental section

All reagents were obtained from commercial sources, and were used without further purification. Column chromatography was generally performed on silica gel (300-400 mesh) and reactions were monitored by thin-layer chromatography (TLC) using UV light to visualize the course of the reactions. IR spectra were recorded on a Varian F-1000 spectrometer in KBr with absorptions in  $\text{cm}^{-1}$ .  $^1\text{H}$  NMR(400 MHz or 300 MHz) and  $^{13}\text{C}$  NMR(100 MHz or 75 MHz) spectra were recorded on a Bruker Avance III HD-400 MHz, Varian Inova-300 MHz and Varian Inova-400 MHz in  $\text{DMSO}-d_6$  solution.  $J$  values are in Hz. Chemical shifts are expressed in ppm downfield from internal standard TMS. High-resolution mass spectra (HRMS) for all the compounds were determined on Bruker MicrOTOF-QII mass spectrometer with ESI resource. X-Ray diffraction analysis were recorded on a Rigaku Mercury CCD/AFC diffractometer.

## 2. General procedure

A mixture of glutaraldehyde **1** (1.0 mmol), malononitrile **2** (1.0 mmol) and  $\beta$ -keto amide **3** (1.0 mmol) was introduced in a 5 mL vial with EtOH (2 mL) as solution and 10 mmol%  $\text{Et}_3\text{N}$ . The reaction vial was closed and prestirred for 20 s. The mixture was irradiated at 100 °C. The reaction was monitored by TLC. After the completion, the reaction mixture was then cooled to room temperature, then filtered, the precipitate was collected and purified by recrystallization from 95% EtOH or by flash column chromatography (petroleum ether : ethyl acetate = 3:1), The analytical data for represent compounds are shown below.

### 3. Characterizations for all compounds

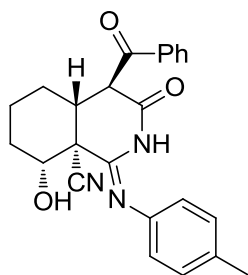

**(Z)-4-Benzoyl-8-hydroxy-3-oxo-1-(p-tolylimino)decahydroisoquinoline-8a-carbonitrile (4a)** white solid (75%); m.p.: 206-208 °C; IR (KBr,  $\text{cm}^{-1}$ )  $\nu$ : 3356, 3188, 3085, 2938, 2866, 2369, 2234, 1688, 1666, 1507, 1446, 1336, 1277, 1225, 1120, 1082, 950, 840, 820, 763, 686;  $^1\text{H}$  NMR (400 MHz,  $\text{DMSO-}d_6$ )  $\delta$ : 10.56 (s, 1H, NH), 8.08 (d,  $J = 7.6$  Hz, 2H, ArH), 7.72 (t,  $J = 7.2$  Hz, 1H, ArH), 7.60 (t,  $J = 7.2$  Hz, 2H, ArH), 7.21-6.99 (m, 4H, ArH), 5.70 (s, 1H, OH), 4.65 (d,  $J = 11.6$  Hz, 1H, CH), 4.32-4.30 (m, 1H, CH), 2.91-2.86 (m, 1H, CH), 2.30 (s, 3H,  $\text{CH}_3$ ), 1.98-1.96 (m, 1H,  $\text{CH}_2$ ), 1.66-1.57 (m, 2H,  $\text{CH}_2$ ), 1.44-1.32 (m, 3H,  $\text{CH}_2$ );  $^{13}\text{C}$  NMR (100 MHz,  $\text{DMSO-}d_6$ )  $\delta$ : 196.7, 137.4, 134.6, 130.1, 129.6, 129.4, 122.0, 116.8, 71.0, 53.6, 49.4, 39.0, 31.2, 27.6, 22.0, 21.0; HRMS calcd for  $\text{C}_{24}\text{H}_{22}\text{N}_3\text{O}_3$   $[\text{M-H}]^-$  400.1661, found: 400.1656.

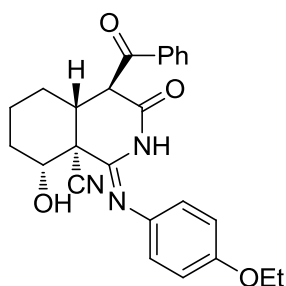

**(Z)-4-Benzoyl-1-((4-ethoxyphenyl)imino)-8-hydroxy-3-oxodecahydroisoquinoline-8a-carbonitrile (4b)** white solid (71%); m.p.: 162-163 °C; IR (KBr,  $\text{cm}^{-1}$ )  $\nu$ : 3360, 3145, 2940, 2876, 2184, 1683, 1665, 1510, 1446, 1397, 1334, 1276, 1251, 1118, 1083, 1084, 950, 840, 766;  $^1\text{H}$  NMR (400 MHz,  $\text{DMSO-}d_6$ )  $\delta$ : 9.72 (s, 1H, NH), 8.09 (d,  $J = 7.2$  Hz, 2H, ArH), 7.72 (t,  $J = 7.2$  Hz, 1H, ArH), 7.60 (t,  $J = 7.6$  Hz, 2H, ArH), 7.17-6.91 (m, 4H, ArH), 5.75 (s, 1H, OH), 4.66 (d,  $J = 11.6$  Hz, 1H, CH), 4.32-4.30 (m, 1H, CH), 4.04-3.98 (m, 2H,  $\text{CH}_2$ ), 2.89 (t,  $J = 10.4$  Hz, 1H, CH), 2.00-1.97 (m, 1H,  $\text{CH}_2$ ), 1.68-1.59 (m, 2H,  $\text{CH}_2$ ), 1.44-1.31 (m, 6H,  $\text{CH}_2 + \text{CH}_3$ );  $^{13}\text{C}$  NMR (100 MHz,  $\text{DMSO-}d_6$ )  $\delta$ : 196.8, 156.5, 137.4, 134.6, 129.6, 129.4, 123.5, 116.8, 115.3, 71.1, 63.7, 53.7, 31.3, 27.6, 22.1, 15.1; HRMS calcd for  $\text{C}_{25}\text{H}_{24}\text{N}_3\text{O}_4$   $[\text{M-H}]^-$  430.1767, found: 430.1763.

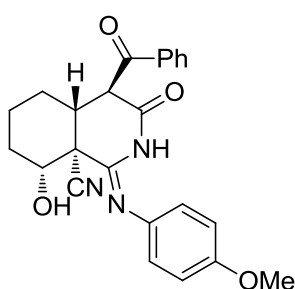

**(Z)-4-Benzoyl-8-hydroxy-1-((4-methoxyphenyl)imino)-3-oxodecahydroisoquinoline-8a-carbonitrile (4c)** white solid (75%); m.p.: 204-205 °C; IR (KBr,  $\text{cm}^{-1}$ )  $\nu$ : 3355, 3188, 3085, 2932, 2869, 2183, 1683, 1664, 1507, 1446, 1336, 1277, 1247, 1226, 1120, 1082, 1031, 950, 839, 787, 765;  $^1\text{H}$  NMR (400 MHz,  $\text{DMSO-}d_6$ )  $\delta$ : 10.42 (s, 1H, NH),

8.08 (d,  $J = 7.6$  Hz, 2H, ArH), 7.72 (t,  $J = 7.2$  Hz, 1H, ArH), 7.60 (t,  $J = 7.6$  Hz, 2H, ArH), 7.15-6.96 (m, 4H, ArH), 5.73 (s, 1H, OH), 4.64 (d,  $J = 11.6$  Hz, 1H, CH), 4.31-4.29 (m, 1H, CH), 3.36 (s, 3H, OCH<sub>3</sub>), 2.91-2.86 (m, 1H, CH), 1.99-1.96 (m, 1H, CH<sub>2</sub>), 1.68-1.58 (m, 2H, CH<sub>2</sub>), 1.44-1.32 (m, 3H, CH<sub>2</sub>); <sup>13</sup>C NMR (100 MHz, DMSO-*d*<sub>6</sub>)  $\delta$ : 196.8, 157.2, 137.4, 134.6, 129.6, 129.4, 123.5, 116.8, 114.9, 71.0, 55.7, 53.7, 31.2, 27.6, 22.1; HRMS calcd for C<sub>24</sub>H<sub>22</sub>N<sub>3</sub>O<sub>4</sub> [M-H]<sup>-</sup> 416.1610, found :416.1605.

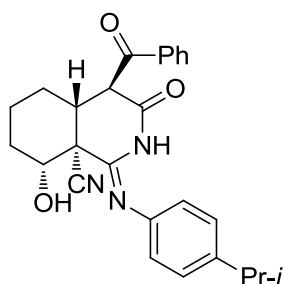

**(Z)-4-Benzoyl-8-hydroxy-1-((4-isopropylphenyl)imino)-3-oxodecahydroisoquinoline-8a-carbonitrile (4d)** white solid (78%); m.p.: 207-209 °C; IR (KBr, cm<sup>-1</sup>)  $\nu$ : 3359, 3192, 3084, 2955, 2869, 2366, 2233, 1686, 1654, 1507, 1446, 1335, 1279, 1120, 1108, 951, 841, 782, 758; <sup>1</sup>H NMR (400 MHz, DMSO-*d*<sub>6</sub>)  $\delta$ : 9.92 (s, 1H, NH), 8.08 (d,  $J = 7.6$  Hz, 2H, ArH),

7.72 (t,  $J = 7.2$  Hz, 1H, ArH), 7.60 (t,  $J = 7.6$  Hz, 2H, ArH), 7.27-7.12 (m, 4H, ArH), 5.74 (s, 1H, OH), 4.65 (d,  $J = 11.6$  Hz, 1H, CH), 4.31-4.29 (m, 1H, CH), 2.90-2.85 (m, 2H, CH  $\times$  2), 1.99-1.96 (m, 1H, CH<sub>2</sub>), 1.68-1.55 (m, 2H, CH<sub>2</sub>), 1.44-1.32 (m, 3H, CH<sub>2</sub>), 1.21 (s, 3H, CH<sub>3</sub>), 1.20 (s, 3H, CH<sub>3</sub>); <sup>13</sup>C NMR (100 MHz, DMSO-*d*<sub>6</sub>)  $\delta$ : 196.7, 137.4, 134.6, 129.6, 129.4, 127.4, 122.1, 116.8, 71.1, 53.7, 33.5, 31.2, 27.6, 24.4, 24.3, 22.0; HRMS calcd for C<sub>26</sub>H<sub>26</sub>N<sub>3</sub>O<sub>3</sub> [M-H]<sup>-</sup> 428.1974, found: 428.1953.

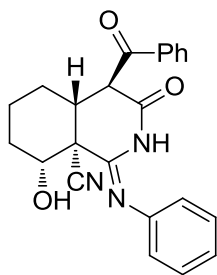

**(Z)-4-Benzoyl-8-hydroxy-3-oxo-1-(phenylimino)decahydroisoquinoline-8a-carbonitrile (4e)** white solid (70%); m.p.: 210-212 °C; IR (KBr, cm<sup>-1</sup>)  $\nu$ : 3388, 3181, 3079, 2935, 2874, 2186, 1685, 1668, 1596, 1447, 1339, 1276, 1228, 1195, 115, 1082, 952, 828, 779, 764, 689; <sup>1</sup>H NMR (400 MHz, DMSO-*d*<sub>6</sub>)  $\delta$ : 10.52 (s, 1H, NH), 8.09 (d,  $J = 7.6$  Hz, 2H, ArH), 7.73 (t,  $J = 7.6$  Hz, 1H, ArH), 7.60 (t,  $J = 7.6$

Hz, 2H, ArH), 7.39 (t,  $J = 8.0$  Hz, 2H, ArH), 7.19-7.16 (m, 3H, ArH), 5.71 (s, 1H, OH), 4.67 (d,  $J = 11.2$  Hz, 1H, CH), 4.32-4.30 (m, 1H, CH), 2.90 (t,  $J = 10.4$  Hz, 1H, CH), 1.99-1.96 (m, 1H, CH<sub>2</sub>), 1.69-1.63 (m, 1H, CH<sub>2</sub>), 1.60-1.57 (m, 1H, CH<sub>2</sub>), 1.45-1.33 (m, 3H, CH<sub>2</sub>); <sup>13</sup>C NMR (100 MHz, DMSO-*d*<sub>6</sub>)  $\delta$ : 196.7, 137.3, 134.7, 129.6, 129.5, 125.4, 122.0, 116.8, 71.0, 53.6, 49.6, 31.3, 27.6, 22.0; HRMS calcd for C<sub>23</sub>H<sub>20</sub>N<sub>3</sub>O<sub>3</sub> [M-H]<sup>-</sup> 386.1505, found: 386.1520.

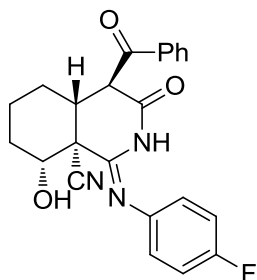

**(Z)-4-Benzoyl-1-((4-fluorophenyl)imino)-8-hydroxy-3-oxodecahydroisoquinoline-8a-carbonitrile (4f)** white solid (67%); m.p.: 220-222 °C; IR (KBr,  $\text{cm}^{-1}$ )  $\nu$ : 3374, 3178, 3074, 2938, 2865, 2237, 1714, 1696, 1597, 1503, 1450, 1338, 1278, 1228, 1117, 1082, 951, 838, 789, 768;  $^1\text{H}$  NMR (400 MHz,  $\text{DMSO-}d_6$ )  $\delta$ : 10.29 (s, 1H, NH), 8.10 (d,  $J = 7.6$  Hz, 2H, ArH), 7.73 (t,  $J = 7.6$  Hz, 1H, ArH), 7.61 (t,  $J = 7.6$  Hz, 2H, ArH), 7.24-7.16 (m, 4H, ArH), 6.01 (s, 1H, OH), 4.69 (d,  $J = 11.6$  Hz, 1H, CH), 4.31-4.28 (m, 1H, CH), 2.93-2.88 (m, 1H, CH), 1.99-1.95 (m, 1H,  $\text{CH}_2$ ), 1.69-1.67 (m, 1H,  $\text{CH}_2$ ), 1.63-1.54 (m, 1H,  $\text{CH}_2$ ), 1.45-1.33 (m, 3H,  $\text{CH}_2$ );  $^{13}\text{C}$  NMR (100 MHz,  $\text{DMSO-}d_6$ )  $\delta$ : 196.6, 160.0 ( $J = 230$  Hz), 137.3, 134.7, 129.7, 129.5, 123.8 ( $J = 7$  Hz), 116.8, 116.3 ( $J = 22$  Hz), 70.9, 53.6, 50.0, 49.9, 38.8, 31.0, 27.5, 22.0; HRMS calcd for  $\text{C}_{23}\text{H}_{19}\text{FN}_3\text{O}_3$   $[\text{M-H}]^-$ : 404.1410, found: 404.1412.

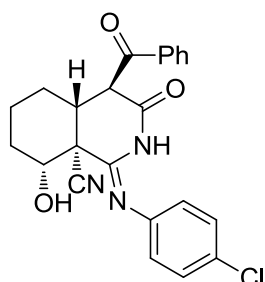

**(Z)-4-Benzoyl-1-((4-chlorophenyl)imino)-8-hydroxy-3-oxodecahydroisoquinoline-8a-carbonitrile (4g)** white solid (78%); m.p.: 222-224 °C; IR (KBr,  $\text{cm}^{-1}$ )  $\nu$ : 3415, 3142, 2941, 2200, 1692, 1668, 1523, 1487, 1384, 1276, 1226, 1119, 1084, 952, 840, 779, 755;  $^1\text{H}$  NMR (400 MHz,  $\text{DMSO-}d_6$ )  $\delta$ : 10.68 (s, 1H, NH), 8.09 (d,  $J = 7.6$  Hz, 2H, ArH), 7.73 (t,  $J = 7.2$  Hz, 1H, ArH), 7.60 (t,  $J = 7.6$  Hz, 2H, ArH), 7.43 (d,  $J = 8.4$  Hz, 2H, ArH), 7.09-6.89 (m, 2H, ArH), 5.68 (s, 1H, OH), 4.68 (d,  $J = 11.6$  Hz, 1H, CH), 4.30-4.28 (m, 1H, CH), 2.94-2.88 (m, 1H, CH), 1.97-1.94 (m, 1H,  $\text{CH}_2$ ), 1.68-1.66 (m, 1H,  $\text{CH}_2$ ), 1.61-1.52 (m, 1H,  $\text{CH}_2$ ), 1.44-1.32 (m, 3H,  $\text{CH}_2$ );  $^{13}\text{C}$  NMR (100 MHz,  $\text{DMSO-}d_6$ )  $\delta$ : 196.5, 137.3, 134.7, 129.7, 129.6, 129.5, 129.4, 127.9, 123.7, 116.8, 70.9, 53.5, 50.0, 38.7, 30.9, 27.5, 22.0; HRMS calcd for  $\text{C}_{23}\text{H}_{19}\text{ClN}_3\text{O}_3$   $[\text{M-H}]^-$ : 420.1115, found: 420.1102

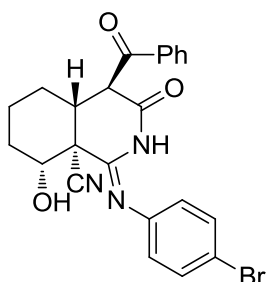

**(Z)-4-Benzoyl-1-((4-bromophenyl)imino)-8-hydroxy-3-oxodecahydroisoquinoline-8a-carbonitrile (4h)** white solid (69%); m.p.: 230-231 °C; IR (KBr,  $\text{cm}^{-1}$ )  $\nu$ : 3312, 3190, 3085, 2941, 2867, 2370, 1686, 1665, 1484, 1446, 1335, 1277, 1227, 1120, 1082, 838, 780;  $^1\text{H}$  NMR (400 MHz,  $\text{DMSO-}d_6$ )  $\delta$ : 10.46 (s, 1H, NH), 8.09 (d,  $J = 7.6$  Hz, 2H, ArH), 7.73 (t,  $J = 6.8$  Hz, 1H,

ArH), 7.62-7.50 (m, 4H, ArH), 7.05-6.83 (m, 2H, ArH), 5.77 (s, 1H, OH), 4.68 (d,  $J = 11.6$  Hz, 1H, CH), 4.29-4.27 (m, 1H, CH), 2.93-2.88 (m, 1H, CH), 1.97-1.94 (m, 1H, CH<sub>2</sub>), 1.68-1.66 (m, 1H, CH<sub>2</sub>), 1.60-1.52 (m, 1H, CH<sub>2</sub>), 1.40-1.32 (m, 3H, CH<sub>2</sub>); <sup>13</sup>C NMR (100 MHz, DMSO-*d*<sub>6</sub>)  $\delta$ : 196.5, 137.3, 134.7, 132.5, 129.7, 129.5, 129.4, 124.2, 117.5, 116.8, 70.9, 53.2, 38.7, 30.9, 27.5, 24.5, 22.0; HRMS calcd for C<sub>23</sub>H<sub>19</sub>BrN<sub>3</sub>O<sub>3</sub> [M-H]<sup>-</sup> 464.0610, found: 464.0610.

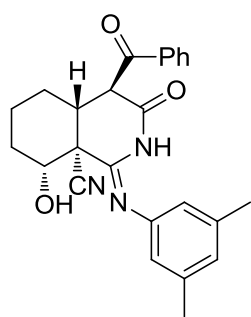

**(Z)-4-Benzoyl-1-((3,5-dimethylphenyl)imino)-8-hydroxy-3-oxodecahydroisoquinoline-8a-carbonitrile (4i)** white solid (75%); m.p.: 194-196 °C; IR (KBr, cm<sup>-1</sup>)  $\nu$ : 3341, 3092, 2938, 2203, 1713, 1666, 1597, 1447, 1357, 1279, 1221, 1121, 1083, 1043, 848, 756; <sup>1</sup>H NMR (400 MHz, DMSO-*d*<sub>6</sub>)  $\delta$ : 10.53 (s, 1H, NH), 8.09 (d,  $J = 8.0$  Hz, 2H, ArH), 7.73 (t,  $J = 7.2$  Hz, 1H, ArH),

7.60 (t,  $J = 7.6$  Hz, 2H, ArH), 6.81-6.63 (m, 3H, ArH), 5.72 (s, 1H, OH), 4.66 (d,  $J = 11.6$  Hz, 1H, CH), 4.30-4.28 (m, 1H, CH), 2.91-2.86 (m, 1H, CH), 2.27 (s, 6H, CH<sub>3</sub> × 2), 1.98-1.95 (m, 1H, CH<sub>2</sub>), 1.69-1.66 (m, 1H, CH<sub>2</sub>), 1.59-1.56 (m, 1H, CH<sub>2</sub>), 1.44-1.32 (m, 3H, CH<sub>2</sub>); <sup>13</sup>C NMR (100 MHz, DMSO-*d*<sub>6</sub>)  $\delta$ : 196.6, 138.8, 137.4, 134.7, 129.6, 129.5, 126.9, 119.5, 119.4, 116.8, 71.2, 53.5, 31.0, 27.5, 22.0, 21.4; HRMS calcd for C<sub>25</sub>H<sub>24</sub>N<sub>3</sub>O<sub>3</sub> [M-H]<sup>-</sup> 414.1818, found: 414.1813.

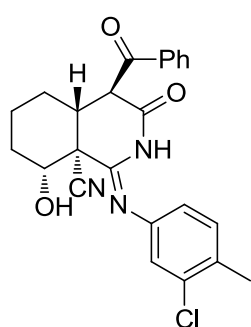

**(Z)-4-Benzoyl-1-((3-chloro-4-methylphenyl)imino)-8-hydroxy-3-oxodecahydroisoquinoline-8a-carbonitrile (4j)** white solid (66%); m.p.: 219-221 °C; IR (KBr, cm<sup>-1</sup>)  $\nu$ : 3349, 3198, 3086, 2944, 2872, 2233, 1685, 1669, 1594, 1492, 1447, 1335, 1279, 1122, 1083, 1047, 825, 789, 767; <sup>1</sup>H NMR (400 MHz, DMSO-*d*<sub>6</sub>)  $\delta$ : 10.46 (s, 1H, NH), 8.09 (d,  $J = 7.6$  Hz, 2H, ArH), 7.73 (t,  $J =$

7.2 Hz, 1H, ArH), 7.60 (t,  $J = 7.6$  Hz, 2H, ArH), 7.34-7.21 (m, 2H, ArH), 6.94-6.92 (m, 1H, ArH), 5.74 (s, 1H, OH), 4.67 (d,  $J = 11.6$  Hz, 1H, CH), 4.29-4.25 (m, 1H, CH), 2.95-2.89 (m, 1H, CH), 2.31 (s, 3H, CH<sub>3</sub>), 1.97-1.94 (m, 1H, CH<sub>2</sub>), 1.68-1.66 (m, 1H, CH<sub>2</sub>), 1.60-1.52 (m, 1H, CH<sub>2</sub>), 1.44-1.31 (m, 3H, CH<sub>2</sub>); <sup>13</sup>C NMR (100 MHz, DMSO-*d*<sub>6</sub>)  $\delta$ : 196.5, 137.3, 134.7, 133.9, 132.1, 131.9, 129.7, 129.5, 122.2, 120.8, 116.8, 70.9, 53.5, 50.1, 38.7, 30.9, 27.5, 22.0, 19.5; HRMS calcd for C<sub>24</sub>H<sub>21</sub>ClN<sub>3</sub>O<sub>3</sub> [M-H]<sup>-</sup> 434.1271, found: 434.1271.

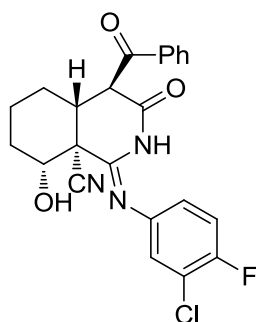

**(Z)-4-Benzoyl-1-((3-chloro-4-fluorophenyl)imino)-8-hydroxy-3-oxodecahydroisoquinoline-8a-carbonitrile (4k)** white solid (76%); m.p.: 217-218 °C; IR (KBr,  $\text{cm}^{-1}$ )  $\nu$ : 3368, 3204, 2946, 2873, 2203, 1667, 1496, 1337, 1279, 1259, 1121, 1083, 953, 825, 773;  $^1\text{H}$  NMR (400 MHz,  $\text{DMSO-}d_6$ )  $\delta$ : 10.76 (s, 1H, NH), 8.09 (d,  $J = 7.6$  Hz, 2H, ArH), 7.73 (t,  $J = 7.2$  Hz, 1H, ArH), 7.62-7.59 (m, 2H, ArH), 7.40 (t,  $J = 8.8$  Hz, 1H, ArH),

7.32 (s, 1H, ArH), 7.02 (s, 1H, ArH), 5.68 (s, 1H, OH), 4.69 (d,  $J = 11.6$  Hz, 1H, CH), 4.28-4.24 (m, 1H, CH), 2.97-2.92 (m, 1H, CH), 1.97-1.94 (m, 1H,  $\text{CH}_2$ ), 1.69-1.67 (m, 1H,  $\text{CH}_2$ ), 1.59-1.51 (m, 1H,  $\text{CH}_2$ ), 1.44-1.31 (m, 3H,  $\text{CH}_2$ );  $^{13}\text{C}$  NMR (100 MHz,  $\text{DMSO-}d_6$ )  $\delta$ : 196.4, 155.1 ( $J = 241$  Hz), 137.3, 134.8, 129.7, 129.5, 123.8, 122.4, 122.3, 120.3, 120.1, 120.0, 117.8 ( $J = 22$  Hz), 116.8, 70.9, 53.4, 50.2, 38.5, 30.7, 27.4, 22.1; HRMS calcd for  $\text{C}_{23}\text{H}_{18}\text{ClFN}_3\text{O}_3$   $[\text{M-H}]^-$  438.1021, found: 438.1026.

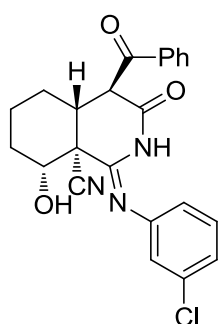

**(Z)-4-Benzoyl-1-((3-chlorophenyl)imino)-8-hydroxy-3-oxodecahydroisoquinoline-8a-carbonitrile 4(l)** white solid (75%); m.p.: 228-230 °C; IR (KBr,  $\text{cm}^{-1}$ )  $\nu$ : 3362, 3191, 3077, 2953, 2865, 2344, 2234, 1694, 1665, 1615, 1446, 1350, 1279, 1227, 1119, 1082, 953, 881, 795, 786;  $^1\text{H}$  NMR (400 MHz,  $\text{DMSO-}d_6$ )  $\delta$ : 10.79 (s, 1H, NH), 8.09 (d,  $J = 7.6$  Hz, 2H, ArH), 7.73 (t,  $J = 7.6$  Hz, 1H, ArH), 7.60 (t,  $J = 7.6$  Hz, 2H, ArH), 7.39 (t,  $J = 8.0$  Hz,

1H, ArH), 7.21-7.19 (m, 2H, ArH), 6.98 (s, 1H, ArH), 5.69 (s, 1H, OH), 4.68 (d,  $J = 11.6$  Hz, 1H, CH), 4.29-4.25 (m, 1H, CH), 2.93 (t,  $J = 10.8$  Hz, 1H, CH), 1.97-1.93 (m, 1H,  $\text{CH}_2$ ), 1.69-1.66 (m, 1H,  $\text{CH}_2$ ), 1.60-1.51 (m, 1H,  $\text{CH}_2$ ), 1.45-1.31 (m, 3H,  $\text{CH}_2$ );  $^{13}\text{C}$  NMR (100 MHz,  $\text{DMSO-}d_6$ )  $\delta$ : 196.5, 137.3, 134.8, 133.9, 131.3, 129.7, 129.5, 124.9, 121.8, 120.6, 116.8, 70.9, 53.5, 50.3, 38.6, 30.8, 27.5, 22.1; HRMS calcd for  $\text{C}_{23}\text{H}_{19}\text{ClN}_3\text{O}_3$   $[\text{M-H}]^-$  420.1115, found: 420.1102.

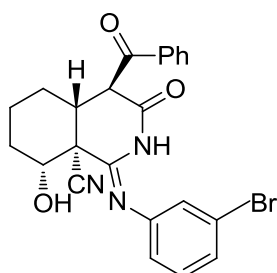

**(Z)-4-Benzoyl-1-((3-bromophenyl)imino)-8-hydroxy-3-oxodecahydroisoquinoline-8a-carbonitrile (4m)** white solid (70%); m.p.: 229-231 °C; IR (KBr,  $\text{cm}^{-1}$ )  $\nu$ : 3352, 3182, 3080, 2946, 2855, 2231, 1695, 1656, 1592, 1473, 1358, 1286, 1228, 1083, 952, 871;  $^1\text{H}$  NMR (400 MHz,  $\text{DMSO-}d_6$ )  $\delta$ :

10.76 (s, 1H, NH), 8.10 (d,  $J = 7.6$  Hz, 2H, ArH), 7.73 (t,  $J = 7.2$  Hz, 1H, ArH), 7.60 (t,  $J = 7.6$  Hz, 2H, ArH), 7.33-7.30 (m, 3H, ArH), 7.03 (s, 1H, ArH), 5.76 (s, 1H, OH), 4.69 (d,  $J = 11.6$  Hz, 1H, CH), 4.29-4.27 (m, 1H, CH), 2.97-2.92 (m, 1H, CH), 1.97-1.94 (m, 1H, CH<sub>2</sub>), 1.69-1.52 (m, 2H, CH<sub>2</sub>), 1.45-1.32 (m, 3H, CH<sub>2</sub>); <sup>13</sup>C NMR (100 MHz, DMSO-*d*<sub>6</sub>)  $\delta$ : 196.5, 137.3, 134.8, 131.5, 129.7, 129.5, 127.8, 124.6, 122.4, 121.0, 116.8, 70.9, 53.5, 38.5, 30.8, 27.5, 22.1; HRMS calcd for C<sub>23</sub>H<sub>20</sub>BrN<sub>3</sub>NaO<sub>3</sub> [M+Na]:<sup>+</sup> 488.0586, found: 488.0597

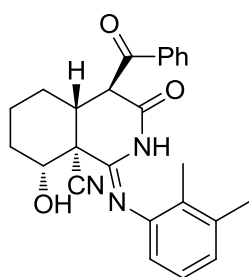

**(Z)-4-Benzoyl-1-((2,3-dimethylphenyl)imino)-8-hydroxy-3-oxodecahydroisoquinoline-8a-carbonitrile (4n)** white solid (67%); m.p.: 185-186 °C; IR (KBr, cm<sup>-1</sup>)  $\nu$ : 3449, 3196, 3070, 2940, 2858, 2368, 2236, 1696, 1664, 1593, 1580, 1446, 1334, 1273, 1258, 1229, 1194, 1080, 950, 801, 775; <sup>1</sup>H NMR (400 MHz, DMSO-*d*<sub>6</sub>)  $\delta$ : 10.36 (s, 1H, NH), 8.09 (d,  $J = 7.6$  Hz, 2H, ArH),

7.75-7.71 (m, 1H, ArH), 7.62-7.58 (m, 2H, ArH), 7.10-7.07 (m, 1H, ArH), 6.98-6.96 (m, 1H, ArH), 6.73 (s, 1H, ArH), 5.83 (s, 1H, OH), 4.70 (d,  $J = 11.6$  Hz, 1H, CH), 4.34-4.32 (m, 1H, CH), 2.91-2.86 (m, 1H, CH), 2.26 (s, 3H, CH<sub>3</sub>), 2.00-1.96 (m, 4H, CH<sub>2</sub> + CH<sub>3</sub>), 1.69-1.67 (m, 1H, CH<sub>2</sub>), 1.60-1.53 (m, 1H, CH<sub>2</sub>), 1.44-1.33 (m, 2H, CH<sub>2</sub>); <sup>13</sup>C NMR (100 MHz, DMSO-*d*<sub>6</sub>)  $\delta$ : 196.6, 137.4, 134.7, 131.0, 129.7, 129.5, 127.1, 125.3, 116.8, 71.3, 53.3, 49.7, 38.8, 30.8, 27.6, 22.0, 17.9; HRMS calcd for C<sub>25</sub>H<sub>24</sub>N<sub>3</sub>O<sub>3</sub> [M-H]:<sup>-</sup> 414.1818, found: 414.1800.

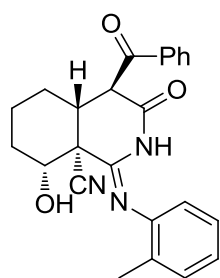

**(Z)-4-Benzoyl-8-hydroxy-3-oxo-1-(o-tolylimino)decahydroisoquinoline-8a-carbonitrile (4o)** white solid (65%); m.p.: 203-205 °C; IR (KBr, cm<sup>-1</sup>)  $\nu$ : 3434, 3182, 2938, 2874, 2187, 1681, 1596, 1446, 1337, 1274, 1255, 1229, 1192, 1113, 1083, 950, 772; <sup>1</sup>H NMR (400 MHz, DMSO-*d*<sub>6</sub>)  $\delta$ : 10.55 (s, 1H, NH), 8.09 (d,  $J = 8.0$  Hz, 2H, ArH), 7.73 (t,  $J = 7.2$  Hz, 1H, ArH), 7.60 (t,  $J = 7.6$  Hz, 2H, ArH), 7.24-7.18 (m, 2H, ArH), 7.09-7.06 (m, 1H, ArH), 6.89 (s, H, ArH), 5.79 (s, 1H, OH), 4.70 (d,  $J = 11.2$  Hz, 1H, CH), 4.34-4.32 (m, 1H, CH), 2.90-2.85 (m, 1H, CH), 2.13 (s, 1H, CH<sub>3</sub>), 1.99-1.96 (m, 1H, CH<sub>2</sub>), 1.69-1.67 (m, 1H, CH<sub>2</sub>), 1.61-1.55 (m, 1H, CH<sub>2</sub>), 1.45-1.37 (m, 3H, CH<sub>2</sub>); <sup>13</sup>C NMR (100 MHz, DMSO-*d*<sub>6</sub>)  $\delta$ : 196.6, 137.4, 134.7, 129.7, 129.5, 129.3, 127.1, 116.8, 71.4, 53.4, 38.7,



30.8, 27.5, 22.0, 17.9 ; HRMS calcd for C<sub>24</sub>H<sub>22</sub>N<sub>3</sub>O<sub>3</sub> [M-H]<sup>-</sup> 400.1661, found: 400.1659.

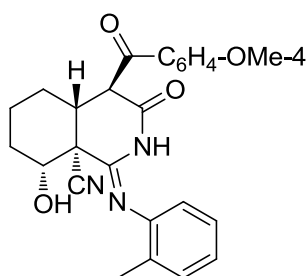

**(Z)-8-Hydroxy-4-(4-methoxybenzoyl)-3-oxo-1-(*o*-tolylimino)decahydroisoquinoline-8a-carbonitrile (4p)** white solid (70%); m.p.: 205-206 °C; IR (KBr, cm<sup>-1</sup>)  $\nu$ : 3448, 3223, 2932, 2861, 2248, 1703, 1654, 1596, 1330, 1272, 1233, 1168, 1115, 1077, 1020, 831; <sup>1</sup>H NMR (400 MHz, DMSO-*d*<sub>6</sub>)  $\delta$ : 10.38 (s, 1H, NH), 8.09 (d, *J* = 9.2 Hz, 2H, ArH), 7.24-7.18 (m, 2H, ArH), 7.12-7.05 (m, 4H, ArH), 5.86 (s, 1H, OH), 4.65 (d, *J* = 11.6 Hz, 1H, CH), 4.34-4.30 (m, 1H, CH), 3.88 (s, 3H, OCH<sub>3</sub>), 2.88-2.82 (m, 1H, CH), 2.13 (s, 3H, CH<sub>3</sub>), 1.99-1.96 (m, 1H, CH<sub>2</sub>), 1.70-1.58 (m, 1H, CH<sub>2</sub>), 1.44-1.32 (m, 3H, CH<sub>2</sub>); <sup>13</sup>C NMR (100 MHz, DMSO-*d*<sub>6</sub>)  $\delta$ : 194.5, 164.5, 132.2, 132.0, 131.0, 130.4, 127.1, 125.2, 116.9, 114.7, 71.3, 56.2, 53.0, 49.8, 30.9, 27.6, 22.0, 19.0, 17.9; HRMS calcd for C<sub>25</sub>H<sub>25</sub>N<sub>3</sub>NaO<sub>4</sub> [M+Na]<sup>+</sup> 454.1743, found: 454.1744

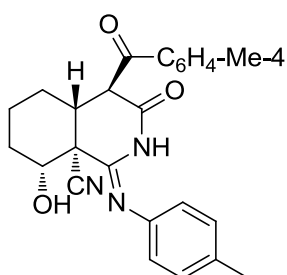

**(Z)-8-Hydroxy-4-(4-methylbenzoyl)-3-oxo-1-(*p*-tolylimino)decahydroisoquinoline-8a-carbonitrile (4q)** white solid (70%); m.p.: 210-211 °C; IR (KBr, cm<sup>-1</sup>)  $\nu$ : 3358, 3176, 3082, 2932, 2867, 2184, 1681, 1606, 1508, 1449, 1337, 1279, 1258, 1227, 1121, 1085, 953, 818; <sup>1</sup>H NMR (400 MHz, DMSO-*d*<sub>6</sub>)  $\delta$ : 9.76 (s, 1H, NH), 7.98 (d, *J* = 8.4 Hz, 2H, ArH), 7.40 (d, *J* = 8.4 Hz, 2H, ArH), 7.21-7.09 (m, 4H, ArH), 5.74 (s, 1H, OH), 4.60 (d, *J* = 11.2 Hz, 1H, CH), 4.31-4.27 (m, 1H, CH), 2.88-2.82 (m, 1H, CH), 2.41 (s, 3H, CH<sub>3</sub>), 2.30 (s, 3H, CH<sub>3</sub>), 1.98-1.94 (m, 1H, CH<sub>2</sub>), 1.68-1.56 (m, 2H, CH<sub>2</sub>), 1.41-1.30 (m, 3H, CH<sub>2</sub>); <sup>13</sup>C NMR (100 MHz, DMSO-*d*<sub>6</sub>)  $\delta$ : 196.1, 145.3, 135.0, 134.5, 130.1, 130.0, 129.8, 122.0, 116.9, 71.1, 53.5, 49.5, 39.1, 31.2, 27.6, 22.0, 21.7, 21.0; HRMS calcd for C<sub>25</sub>H<sub>25</sub>N<sub>3</sub>NaO<sub>3</sub> [M+Na]<sup>+</sup> 438.1794, found: 438.1804.

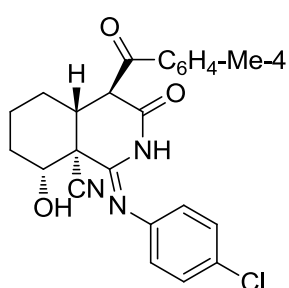

**(Z)-1-((4-Chlorophenyl)imino)-8-hydroxy-4-(4-methylbenzoyl)-3-oxodecahydroisoquinoline-8a-carbonitrile (4r)** white solid (68%); m.p.: 220-222 °C; IR (KBr, cm<sup>-1</sup>)  $\nu$ : 3366, 3165, 3077, 2926, 2870, 2236, 1652, 1598, 1481, 1444, 1331, 1274, 1220, 1121, 1084, 950, 840, 823; <sup>1</sup>H

NMR (400 MHz, DMSO- $d_6$ )  $\delta$ : 10.41 (s, 1H, NH), 7.99 (d,  $J = 8.0$  Hz, 2H, ArH), 7.41 (t,  $J = 8.4$  Hz, 4H, ArH), 7.11-6.88 (m, 2H, ArH), 6.18 (s, 1H, OH), 4.63 (d,  $J = 11.2$  Hz, 1H, CH), 4.29-4.27 (m, 1H, CH), 2.90-2.85 (m, 1H, CH), 2.41 (s, 3H, CH<sub>3</sub>), 1.96-1.93 (m, 1H, CH<sub>2</sub>), 1.66-1.52 (m, 2H, CH<sub>2</sub>), 1.42-1.31 (m, 3H, CH<sub>2</sub>); <sup>13</sup>C NMR (100 MHz, DMSO- $d_6$ )  $\delta$ : 195.9, 145.5, 134.9, 130.0, 129.8, 129.6, 129.3, 123.8, 116.8, 70.9, 53.4, 50.1, 38.8, 30.9, 27.6, 22.1, 21.7; HRMS calcd for C<sub>24</sub>H<sub>22</sub>ClN<sub>3</sub>NaO<sub>3</sub> [M+Na]<sup>+</sup>: 458.1247, found: 458.1246.

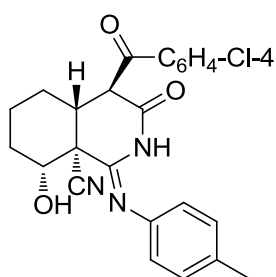

**(Z)-4-(4-Chlorobenzoyl)-8-hydroxy-3-oxo-1-(*p*-tolylimino)decahydroisoquinoline-8a-carbonitrile (4s)** white solid (65%); m.p.: 218-219 °C; IR (KBr, cm<sup>-1</sup>)  $\nu$ : 3176, 3082, 2938, 2864, 2273, 1686, 1661, 1588, 1507, 1400, 1336, 1278, 1256, 1085, 953, 841, 820; <sup>1</sup>H NMR (400 MHz, DMSO- $d_6$ )  $\delta$ : 9.78 (s, 1H, NH), 8.12 (d,  $J = 8.8$  Hz, 2H, ArH), 7.65 (d,  $J = 8.4$  Hz, 2H, ArH), 7.21-7.12 (m, 4H, ArH), 5.74 (s, 1H, OH), 4.67 (d,  $J = 11.2$  Hz, 1H, CH), 4.32-4.29 (m, 1H, CH), 2.92-2.86 (m, 1H, CH), 2.30 (s, 3H, CH<sub>3</sub>), 1.99-1.96 (m, 1H, CH<sub>2</sub>), 1.68-1.58 (m, 2H, CH<sub>2</sub>), 1.44-1.32 (m, 3H, CH<sub>2</sub>); <sup>13</sup>C NMR (100 MHz, DMSO- $d_6$ )  $\delta$ : 195.7, 139.7, 136.0, 134.6, 131.6, 130.1, 129.5, 122.0, 116.7, 71.1, 53.7, 49.3, 39.0, 31.3, 27.5, 22.1, 21.0; HRMS calcd for C<sub>24</sub>H<sub>22</sub>ClN<sub>3</sub>NaO<sub>3</sub> [M+Na]<sup>+</sup>: 458.1247, found: 458.1239.

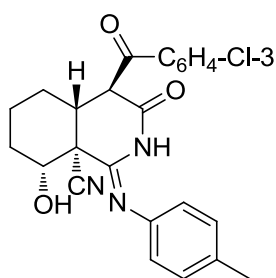

**(Z)-4-(3-Chlorobenzoyl)-8-hydroxy-3-oxo-1-(*p*-tolylimino)decahydroisoquinoline-8a-carbonitrile (4t)** white solid (74%); m.p.: 192-193 °C; IR (KBr, cm<sup>-1</sup>)  $\nu$ : 3365, 3183, 2945, 2867, 2344, 1685, 1668, 1569, 1508, 1339, 1280, 1257, 1199, 1118, 1083, 842; <sup>1</sup>H NMR (400 MHz, DMSO- $d_6$ )  $\delta$ : 9.83 (s, 1H, NH), 8.14 (s, 1H, ArH), 8.06 (d,  $J = 7.6$  Hz, 1H, ArH), 7.80-7.77 (m, 1H, ArH), 7.62 (t,  $J = 7.6$  Hz, 1H, ArH), 7.21-7.12 (m, 4H, ArH), 5.67 (s, 1H, OH), 4.72 (d,  $J = 11.6$  Hz, 1H, CH), 4.32-4.30 (m, 1H, CH), 2.92-2.87 (m, 1H, CH), 2.30 (s, 3H, CH<sub>3</sub>), 1.99-1.96 (m, 1H, CH<sub>2</sub>), 1.68-1.58 (m, 2H, CH<sub>2</sub>), 1.45-1.35 (m, 3H, CH<sub>2</sub>); <sup>13</sup>C NMR (100 MHz, DMSO- $d_6$ )  $\delta$ : 195.8, 139.1, 134.3, 134.2, 131.3, 130.1, 129.3, 128.4, 122.0, 116.7, 71.1, 53.9, 27.4, 22.1, 21.0; HRMS calcd for C<sub>24</sub>H<sub>22</sub>ClN<sub>3</sub>NaO<sub>3</sub> [M+Na]<sup>+</sup>: 458.1247, found: 458.1239

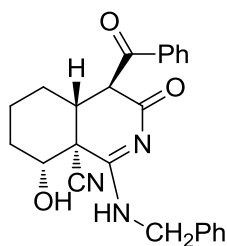

**4-Benzoyl-1-(benzylamino)-8-hydroxy-3-oxo-3,4,4a,5,6,7,8,8a-octahydroisoquinoline-8a-carbonitrile (5a)** white solid (58%); m.p.:179-181 °C; IR (KBr,  $\text{cm}^{-1}$ )  $\nu$ :3381, 3254, 2956, 2865, 2239, 1973, 1680, 1650, 1590, 1543, 1424, 1286, 1193, 1120, 1059, 1005, 845, 782, 757;  $^1\text{H}$  NMR (400 MHz,  $\text{DMSO-}d_6$ )  $\delta$ : 9.40 (s, 1H, NH), 8.06 (d,  $J = 8.0$  Hz, 2H, ArH), 7.71-7.67 (m, 1H, ArH), 7.59-7.53 (m, 2H, ArH), 7.41-7.31 (m, 5H, ArH), 6.99 (s, 1H, OH), 4.73-4.63 (m, 2H,  $\text{CH}_2$ ), 4.56-4.54 (m, 1H, CH), 4.26-4.24 (m, 1H, CH), 2.83-2.78 (m, 1H, CH), 2.02-2.00 (m, 1H,  $\text{CH}_2$ ), 1.64-1.62 (m, 2H,  $\text{CH}_2$ ), 1.40-1.28 (m, 3H,  $\text{CH}_2$ );  $^{13}\text{C}$  NMR (100 MHz,  $\text{DMSO-}d_6$ )  $\delta$ :197.4, 137.8, 134.2, 129.7, 129.5, 129.3, 129.1, 128.7, 127.8, 127.5, 116.6, 71.1, 54.2, 47.5, 32.5, 27.4, 22.0; HRMS calcd for  $\text{C}_{24}\text{H}_{24}\text{N}_3\text{O}_3$   $[\text{M}+\text{H}]^+$ : 402.1818, found: 402.1840.

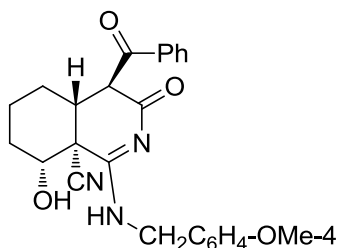

**4-Benzoyl-8-hydroxy-1-((4-methoxybenzyl)amino)-3-oxo-3,4,4a,5,6,7,8,8a-octahydroisoquinoline-8a-carbonitrile (5b)** white solid (61%); m.p.:168-170 °C; IR (KBr,  $\text{cm}^{-1}$ )  $\nu$ :3433, 3242, 2942, 2856, 2203, 1685, 1640, 1560, 1541, 1458, 1274, 1250, 1200, 1178, 1060, 1035, 814, 770, 740, 704, 686;  $^1\text{H}$  NMR (400 MHz,  $\text{DMSO-}d_6$ )  $\delta$ : 9.28 (s, 1H, NH), 8.03 (d,  $J = 7.6$  Hz, 2H, ArH), 7.71-7.68 (m, 1H, ArH), 7.57 (t,  $J = 7.6$  Hz, 2H, ArH), 7.29 (d,  $J = 8.4$  Hz, 2H, ArH), 6.95-6.88 (m, 3H, ArH + OH), 4.62-4.48 (m, 3H, CH +  $\text{CH}_2$ ), 4.22-4.20 (m, 1H, CH), 3.75 (s, 3H,  $\text{CH}_3$ ), 2.79-2.73 (m, 1H, CH), 1.99-1.96 (m, 1H,  $\text{CH}_2$ ), 1.60-1.57 (m, 2H,  $\text{CH}_2$ ), 1.39-1.25 (m, 3H,  $\text{CH}_2$ );  $^{13}\text{C}$  NMR (100 MHz,  $\text{DMSO-}d_6$ )  $\delta$ :197.5, 159.1, 137.8, 134.2, 129.7, 129.5, 129.4, 129.3, 129.0, 116.5, 114.5, 114.1, 71.0, 55.6, 54.2, 44.8, 32.5, 27.4, 22.0; HRMS calcd for  $\text{C}_{25}\text{H}_{24}\text{N}_3\text{O}_3$   $[\text{M}-\text{H}]^-$ : 430.1767, found: 430.1753.

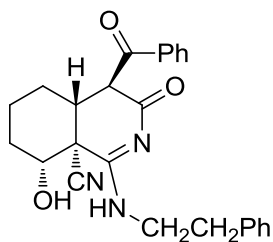

**4-Benzoyl-8-hydroxy-3-oxo-1-(phenethylamino)-3,4,4a,5,6,7,8,8a-octahydroisoquinoline-8a-carbonitrile (5c)** white solid (64%); m.p.: 176-178 °C; IR (KBr,  $\text{cm}^{-1}$ )  $\nu$ :3387, 3244, 2940, 2184, 1681, 1650, 1574, 1532, 1460, 1383, 1291, 1195, 1123, 1001, 752, 698;  $^1\text{H}$  NMR (400 MHz,  $\text{DMSO-}d_6$ )  $\delta$ : 9.01 (s, 1H, NH), 8.02 (d,  $J = 7.6$  Hz, 2H, ArH), 7.71-7.67 (m, 1H, ArH), 7.59-7.56

(m, 2H, ArH), 7.34-7.22 (m, 5H, ArH), 6.86 (s, 1H, OH), 4.46 (d,  $J = 9.2$  Hz, 1H, CH), 4.07-4.05 (m, 1H, CH), 3.66-3.65 (m, 2H, CH<sub>2</sub>), 2.89 (t,  $J = 6.8$  Hz, 2H, CH<sub>2</sub>), 2.67 (t,  $J = 6.8$  Hz, 1H, CH), 1.98-1.96 (m, 1H, CH<sub>2</sub>), 1.62-1.55 (m, 2H, CH<sub>2</sub>), 1.34-1.23 (m, 3H, CH<sub>2</sub>); <sup>13</sup>C NMR (100 MHz, DMSO-*d*<sub>6</sub>)  $\delta$ : 175.7, 139.3, 137.8, 134.2, 129.7, 129.5, 129.3, 129.2, 128.9, 127.9, 126.8, 116.5, 71.1, 56.5, 54.1, 34.4, 27.4, 22.0; HRMS calcd for C<sub>25</sub>H<sub>24</sub>N<sub>3</sub>O<sub>3</sub> [M-H]<sup>-</sup>: 414.1818, found: 414.1814.

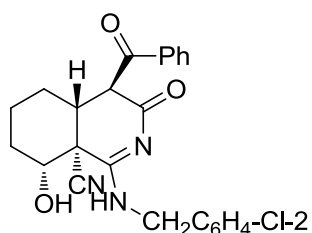

**4-Benzoyl-1-((2-chlorobenzyl)amino)-8-hydroxy-3-oxo-3,4,4a,5,6,7,8,8a-octahydroisoquinoline-8a-carbonitrile**

**(5d)** white solid (77%); m.p.:192-194 °C; IR (KBr, cm<sup>-1</sup>)  $\nu$ :3228, 2917, 2893, 2180, 1684, 1642, 1557, 1536, 1362, 1270, 1249, 1194, 1125, 1060, 1002, 841, 783, 752, 685; <sup>1</sup>H

NMR (400 MHz, DMSO-*d*<sub>6</sub>)  $\delta$ : 9.46 (s, 1H, NH), 8.04-8.02 (m, 2H, ArH), 7.71-7.68 (m, 1H, ArH), 7.57 (t,  $J = 7.6$  Hz, 2H, ArH), 7.52-7.50 (m, 1H, ArH), 7.42-7.34 (m, 3H, ArH), 7.01 (s, 1H, OH), 4.72-4.70 (m, 2H, CH<sub>2</sub>), 4.50-4.49 (m, 1H, CH), 4.27-4.23 (m, 1H, CH), 2.81-2.76 (m, 1H, CH), 2.02-1.97 (m, 1H, CH<sub>2</sub>), 1.64-1.62 (m, 2H, CH<sub>2</sub>), 1.40-1.27 (m, 3H, CH<sub>2</sub>); <sup>13</sup>C NMR (100 MHz, DMSO-*d*<sub>6</sub>)  $\delta$ :197.3, 137.7, 134.3, 132.9, 129.9, 129.7, 129.5, 129.3, 127.9, 116.5, 71.1, 54.1, 47.3, 32.4, 27.4, 22.0; HRMS calcd for C<sub>24</sub>H<sub>23</sub>ClN<sub>3</sub>O<sub>3</sub> [M+H]<sup>+</sup>: 436.1428, found: 436.1456.

**1-(Benzylamino)-8-hydroxy-4-(4-methylbenzoyl)-3-oxo-3,4,4a,5,6,7,8,8a-octahydroisoquinoline-8a-carbonitrile (5e)** white solid (70%);

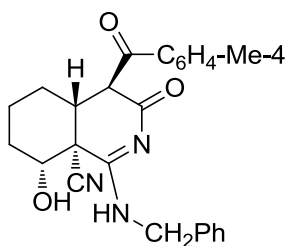

m.p.:192-193 °C; IR (KBr, cm<sup>-1</sup>)  $\nu$ : 3206, 3090, 2933, 2866, 2235, 1698, 1680, 1606, 1446, 1357, 1292, 1180, 1124, 1087, 1002, 814, 753, 738, 666; <sup>1</sup>H NMR (400 MHz, DMSO-*d*<sub>6</sub>)  $\delta$ : 9.40 (s, 1H, NH), 7.94 (d,  $J = 8.0$  Hz, 2H, ArH), 7.41-7.29 (m, 7H, ArH), 6.99 (s, 1H, OH), 4.72-4.761 (m, 2H, CH<sub>2</sub>),

4.50-4.48 (m, 1H, CH), 4.24-4.23 (m, 1H, CH), 2.80-2.74 (m, 1H, CH), 2.39 (s, 3H, CH<sub>3</sub>), 2.01-1.99 (m, 1H, CH<sub>2</sub>), 1.63-1.61 (m, 2H, CH<sub>2</sub>), 1.42-1.26 (m, 3H, CH<sub>2</sub>); <sup>13</sup>C NMR (100 MHz, DMSO-*d*<sub>6</sub>)  $\delta$ :196.8, 144.9, 135.3, 129.9, 129.7, 129.1, 128.8, 127.8, 116.5, 71.0, 54.1, 27.4, 22.0, 21.7; HRMS calcd for C<sub>25</sub>H<sub>26</sub>N<sub>3</sub>O<sub>3</sub> [M+H]<sup>+</sup>: 416.1974, found: 416.1993.

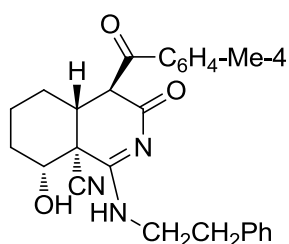

**8-Hydroxy-4-(4-methylbenzoyl)-3-oxo-1-(phenethylamino)-3,4,4a,5,6,7,8,8a-octahydroisoquinoline-8a-carbonitrile (5f)** white solid (66%); m.p.:178-180 °C; IR (KBr,  $\text{cm}^{-1}$ )  $\nu$ :3188, 2941, 2854, 2233, 1681, 1657, 1581, 1530, 1459, 1353, 1274, 1203, 1184, 1078, 1024, 866, 845, 747, 716, 624;

$^1\text{H}$  NMR (400 MHz,  $\text{DMSO-}d_6$ )  $\delta$ : 9.00 (s, 1H, NH), 7.94 (d,  $J = 7.6$  Hz, 2H, ArH), 7.38-7.22 (m, 7H, ArH), 6.86 (s, 1H, OH), 4.47-4.44 (m, 1H, CH), 4.05-4.03 (m, 1H, CH), 3.66-3.64 (m, 2H,  $\text{CH}_2$ ), 2.89 (t,  $J = 6.8$  Hz, 2H, ArH), 2.69-2.63 (m, 1H, CH), 2.39 (s, 3H,  $\text{CH}_3$ ), 1.98-1.95 (m, 1H,  $\text{CH}_2$ ), 1.59-1.56 (m, 2H,  $\text{CH}_2$ ), 1.34-1.22 (m, 3H,  $\text{CH}_2$ );  $^{13}\text{C}$  NMR (100 MHz,  $\text{DMSO-}d_6$ )  $\delta$ :196.8, 144.8, 139.3, 135.4, 129.9, 129.7, 129.2, 128.9, 126.8, 116.5, 71.1, 56.6, 54.0, 34.5, 27.4, 22.1, 21.7; HRMS calcd for  $\text{C}_{26}\text{H}_{28}\text{N}_3\text{O}_3$   $[\text{M}+\text{H}]^+$ : 430.2131, found: 430.2143.

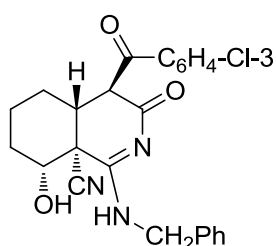

**1-(Benzylamino)-4-(3-chlorobenzoyl)-8-hydroxy-3-oxo-3,4,4a,5,6,7,8,8a-octahydroisoquinoline-8a-carbonitrile (5g)** white solid (73%); m.p.:202-203 °C; IR (KBr,  $\text{cm}^{-1}$ )  $\nu$ :3347, 3236, 2946, 2863, 2236, 1683, 1647, 1575, 1529, 1448, 1359, 1280, 1186, 1123, 1056, 1026,1011, 894, 775, 754,

697;  $^1\text{H}$  NMR (400 MHz,  $\text{DMSO-}d_6$ )  $\delta$ : 9.25 (s, 1H, NH), 8.08 (s, 1H, ArH), 8.02 (d,  $J = 7.6$  Hz, 1H, ArH), 7.76-7.74 (m, 1H, ArH), 7.62-7.58 (m, 1H, ArH), 7.40-7.30 (m, 6H, ArH + OH), 4.72-4.57 (m, 3H,  $\text{CH}_2 + \text{CH}$ ), 4.26-4.24 (m, 1H, CH), 2.82-2.77 (m, 1H, CH), 2.02-1.99 (m, 1H,  $\text{CH}_2$ ), 1.64-1.62 (m, 2H,  $\text{CH}_2$ ), 1.41-1.30 (m, 3H,  $\text{CH}_2$ );  $^{13}\text{C}$  NMR (100 MHz,  $\text{DMSO-}d_6$ )  $\delta$ :196.5, 139.5, 134.2, 133.9, 131.2, 129.1, 129.0, 128.7, 128.3, 127.8, 127.5, 116.4, 71.1, 54.4, 32.6, 27.3, 22.1; HRMS calcd for  $\text{C}_{24}\text{H}_{23}\text{ClN}_3\text{O}_3$   $[\text{M}+\text{H}]^+$ : 436.1428, found: 436.1445.

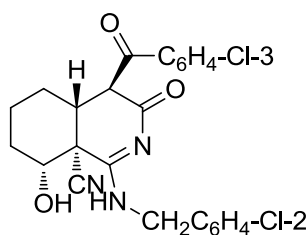

**4-(3-chlorobenzoyl)-1-((2-chlorobenzyl)amino)-8-hydroxy-3-oxo-3,4,4a,5,6,7,8,8a-octahydroisoquinoline-8a-carbonitrile (5h)** white solid (52%); m.p.:210-212 °C; IR (KBr,  $\text{cm}^{-1}$ )  $\nu$ :3369, 3239, 2943, 2865, 2237, 1683, 1646, 1576, 1536, 1442, 1381, 1358, 1280, 1187, 1121, 1060,

1023, 895, 756, 737, 694;  $^1\text{H}$  NMR (400 MHz,  $\text{DMSO-}d_6$ )  $\delta$ : 9.43 (s, 1H, NH),

8.08-8.01 (m, 2H, ArH), 7.76-7.73 (m, 1H, ArH), 7.63-7.57 (m, 1H, ArH), 7.48-7.36 (m, 5H, ArH + OH), 4.72-4.761 (m, 3H, CH<sub>2</sub> + CH), 4.24-4.23 (m, 1H, CH), 2.80-2.74 (m, 1H, CH), 2.01-1.99 (m, 1H, CH<sub>2</sub>), 1.65-1.60 (m, 2H, CH<sub>2</sub>), 1.44-1.30 (m, 3H, CH<sub>2</sub>); <sup>13</sup>C NMR (100 MHz, DMSO-*d*<sub>6</sub>) δ:196.4, 139.5, 134.3, 133.9, 132.9, 131.2, 129.9, 129.7, 129.1, 128.3, 127.9, 116.4, 71.2, 54.3, 32.5, 27.3, 22.1; HRMS calcd for C<sub>24</sub>H<sub>22</sub>Cl<sub>2</sub>N<sub>3</sub>O<sub>3</sub> [M+H]<sup>+</sup>: 470.1038, found: 470.1058.

#### 4. Crystal data of compound 4c

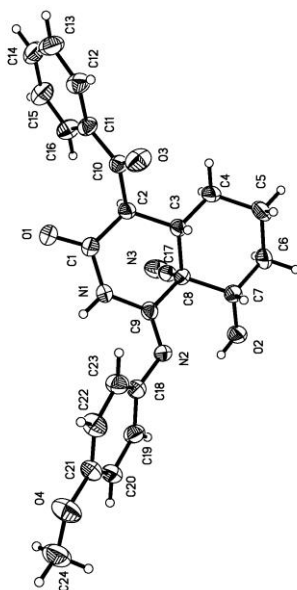

**Figure 1.** The Crystal Structure of **4c**

**Table 1** Crystallographic Data of Compound **4c**

|                      |                                                                                         |
|----------------------|-----------------------------------------------------------------------------------------|
| Empirical formula    | $C_{24}H_{23}N_3O_4$                                                                    |
| Formula weight       | 417.45                                                                                  |
| Temperature          | 298(2) K                                                                                |
| Wavelength           | 0.71073 Å                                                                               |
| Crystal system       | Monoclinic                                                                              |
| space group          | P2(1)                                                                                   |
| Unit cell dimensions | $a = 6.8289(7)$ Å $\alpha = 90^\circ$<br>$b = 13.5136(12)$ Å $\beta = 106.143(2)^\circ$ |

---

|                                      |                                                   |
|--------------------------------------|---------------------------------------------------|
|                                      | $c = 12.1421(11) \text{ \AA}$ $\gamma = 90^\circ$ |
| Volume                               | 1076.33(18) $\text{\AA}^3$                        |
| Z                                    | 2                                                 |
| Calculated density                   | 1.288 Mg/m <sup>3</sup>                           |
| Absorption coefficient               | 0.089 mm <sup>-1</sup>                            |
| F(000)                               | 440                                               |
| Crystal size                         | 0.27 × 0.25 × 0.12 mm                             |
| Theta range for data collection      | 3.01 ° to 25.02 °                                 |
| Limiting indices                     | -6 ≤ h ≤ 8, -14 ≤ k ≤ 16, -14 ≤ l ≤ 13            |
| Reflections collected                | 5526                                              |
| Independent reflections              | 3310 [R(int) = 0.0651]                            |
| Data / restraints / parameters       | 3310 / 1 / 282                                    |
| Goodness-of-fit on F <sup>2</sup>    | 0.908                                             |
| Final R indices [ $I > 2\sigma(I)$ ] | $R_1 = 0.0544$ , $wR_2 = 0.0710$                  |
| R indices (all data)                 | $R_1 = 0.1146$ , $wR_2 = 0.0817$                  |
| Largest diff. peak and hole          | 0.155 and -0.140 e. $\text{\AA}^{-3}$             |

---

**Table 2** Selected Bond Lengths ( $\text{\AA}$ ) of Compound **4c**

| Bond | Bond Lengths | Bond | Bond Lengths | Bond | Bond Lengths |
|------|--------------|------|--------------|------|--------------|
|      |              |      |              |      |              |

---



|             |          |             |          |             |          |
|-------------|----------|-------------|----------|-------------|----------|
| N(1)-C(1)   | 1.372(5) | N(1)-C(9)   | 1.409(5) | N(2)-C(9)   | 1.268(5) |
| N(2)-C(18)  | 1.427(5) | N(3)-C(17)  | 1.141(5) | O(1)-C(1)   | 1.229(5) |
| O(2)-C(7)   | 1.432(5) | O(3)-C(10)  | 1.228(4) | O(4)-C(21)  | 1.368(5) |
| O(4)-C(24)  | 1.421(6) | C(1)-C(2)   | 1.513(6) | C(2)-C(3)   | 1.523(5) |
| C(2)-C(10)  | 1.544(6) | C(3)-C(4)   | 1.525(5) | C(3)-C(8)   | 1.547(5) |
| C(4)-C(5)   | 1.530(5) | C(5)-C(6)   | 1.522(6) | C(6)-C(7)   | 1.504(5) |
| C(7)-C(8)   | 1.551(6) | C(8)-C(17)  | 1.490(5) | C(8)-C(9)   | 1.516(5) |
| C(10)-C(11) | 1.470(6) | C(11)-C(16) | 1.401(5) | C(11)-C(12) | 1.401(6) |
| C(12)-C(13) | 1.389(6) | C(13)-C(14) | 1.379(7) | C(14)-C(15) | 1.382(7) |
| C(15)-C(16) | 1.387(6) | C(18)-C(23) | 1.387(5) | C(18)-C(19) | 1.392(6) |
| C(19)-C(20) | 1.390(6) | C(20)-C(21) | 1.373(5) | C(21)-C(22) | 1.377(7) |
| C(22)-C(23) | 1.378(6) |             |          |             |          |

**Table 3** Selected Bond Angles (°) for Compound **4c**

| Angles           | (°)      | Angles          | (°)      |
|------------------|----------|-----------------|----------|
| C(1)-N(1)-C(9)   | 126.6(4) | C(9)-N(2)-C(18) | 124.1(4) |
| C(21)-O(4)-C(24) | 118.3(4) | O(1)-C(1)-N(1)  | 121.1(5) |
| O(20)-C(1)-C(2)  | 121.2(4) | N(1)-C(1)-C(2)  | 117.7(4) |
| C(1)-C(2)-C(3)   | 114.4(3) | C(1)-C(2)-C(10) | 108.0(3) |
| C(3)-C(2)-C(10)  | 111.6(4) | C(4)-C(3)-C(2)  | 112.1(4) |
| C(4)-C(3)-C(8)   | 111.2(3) | C(2)-C(3)-C(8)  | 110.3(3) |
| C(3)-C(4)-C(5)   | 110.7(4) | C(6)-C(5)-C(4)  | 110.0(4) |

|                   |          |                   |          |
|-------------------|----------|-------------------|----------|
| C(7)-C(6)-N(5)    | 112.8(4) | O(2)-C(7)-C(6)    | 107.5(4) |
| O(2)-C(7)-C(8)    | 111.0(4) | C(6)-C(7)-C(8)    | 111.2(4) |
| C(17)-C(8)-C(9)   | 107.9(4) | C(17)-C(8)-C(3)   | 109.2(4) |
| C(9)-C(8)-C(3)    | 109.4(3) | C(17)-C(8)-C(7)   | 108.4(4) |
| C(9)-C(8)-C(7)    | 111.5(4) | C(3)-C(8)-C(7)    | 110.3(3) |
| N(2)-C(9)-N(1)    | 124.2(4) | N(2)-C(9)-C(8)    | 119.5(4) |
| N(1)-C(9)-C(8)    | 116.3(4) | O(3)-C(10)-C(11)  | 121.8(4) |
| O(3)-C(10)-C(2)   | 116.5(4) | C(11)-C(10)-C(2)  | 121.6(4) |
| C(16)-C(11)-C(12) | 117.4(4) | C(16)-C(11)-C(10) | 123.9(4) |
| C(12)-C(11)-C(10) | 118.7(4) | C(13)-C(12)-C(11) | 121.5(5) |
| C(14)-C(13)-C(12) | 119.3(5) | C(13)-C(14)-C(15) | 121.0(5) |
| C(14)-C(15)-C(16) | 119.4(5) | C(15)-C(16)-C(11) | 121.4(5) |
| N(3)-C(17)-C(8)   | 176.9(5) | C(23)-C(18)-C(19) | 118.2(4) |
| C(23)-C(18)-N(2)  | 124.0(5) | C(19)-C(18)-N(2)  | 117.3(4) |
| C(20)-C(19)-C(18) | 120.9(5) | C(21)-C(20)-C(19) | 119.8(5) |
| O(4)-C(21)-C(20)  | 124.7(5) | O(4)-C(21)-C(22)  | 115.6(5) |
| C(20)-C(21)-C(22) | 119.7(5) | C(21)-C(22)-C(23) | 120.8(5) |
| C(22)-C(23)-C(18) | 120.6(5) |                   |          |

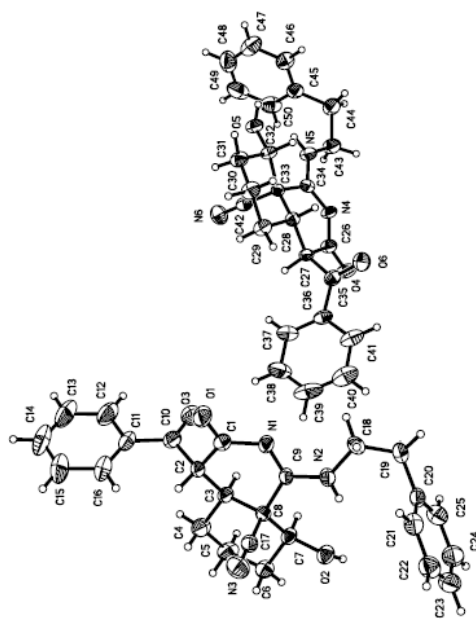

**Figure 2.** The Crystal Structure of **5c**

**Table 4** Crystallographic Data of Compound **5c**

|                      |                                                                                                                                                                     |
|----------------------|---------------------------------------------------------------------------------------------------------------------------------------------------------------------|
| Empirical formula    | $C_{25}H_{25}N_3O_3$                                                                                                                                                |
| Formula weight       | 415.48                                                                                                                                                              |
| Temperature          | 298(2) K                                                                                                                                                            |
| Wavelength           | 0.71073 Å                                                                                                                                                           |
| Crystal system       | Monoclinic                                                                                                                                                          |
| space group          | P2(1)/c                                                                                                                                                             |
| Unit cell dimensions | $a = 18.9871(17) \text{ \AA}$ $\alpha = 90^\circ$<br>$b = 18.0668(16) \text{ \AA}$ $\beta = 94.4380(10)^\circ$<br>$c = 12.5460(11) \text{ \AA}$ $\gamma = 90^\circ$ |

|                                   |                                                   |
|-----------------------------------|---------------------------------------------------|
| Volume                            | 4290.8(7) Å <sup>3</sup>                          |
| Z                                 | 8                                                 |
| Calculated density                | 1.286 Mg/m <sup>3</sup>                           |
| Absorption coefficient            | 0.086 mm <sup>-1</sup>                            |
| F(000)                            | 1760                                              |
| Crystal size                      | 0.32 × 0.17 × 0.14 mm                             |
| Theta range for data collection   | 2.19 ° to 25.02 °                                 |
| Limiting indices                  | -22 ≤ h ≤ 18, -21 ≤ k ≤ 18, -14 ≤ l ≤ 14          |
| Reflections collected             | 21692                                             |
| Independent reflections           | 7559 [R(int) = 0.0960]                            |
| Data / restraints / parameters    | 7559 / 0 / 561                                    |
| Goodness-of-fit on F <sup>2</sup> | 0.884                                             |
| Final R indices [I > 2σ(I)]       | R <sub>1</sub> = 0.0540, wR <sub>2</sub> = 0.0692 |
| R indices (all data)              | R <sub>1</sub> = 0.1807, wR <sub>2</sub> = 0.0846 |
| Largest diff. peak and hole       | 0.169 and -0.211 e. Å <sup>-3</sup>               |

**Table 5** Selected Bond Lengths (Å) of Compound **5c**

| Bond      | Bond Lengths | Bond      | Bond Lengths | Bond      | Bond Lengths |
|-----------|--------------|-----------|--------------|-----------|--------------|
| N(1)-C(9) | 1.320(3)     | N(1)-C(1) | 1.379(3)     | N(2)-C(9) | 1.305(3)     |

|             |          |             |          |             |          |
|-------------|----------|-------------|----------|-------------|----------|
| N(2)-C(18)  | 1.454(3) | N(3)-C(17)  | 1.139(4) | O(1)-C(1)   | 1.225(3) |
| O(2)-C(7)   | 1.444(3) | O(3)-C(10)  | 1.220(4) | C(1)-C(2)   | 1.516(4) |
| C(2)-C(10)  | 1.527(4) | C(2)-C(3)   | 1.528(3) | C(3)-C(4)   | 1.530(4) |
| C(3)-C(8)   | 1.534(4) | C(4)-C(5)   | 1.527(4) | C(5)-C(6)   | 1.507(4) |
| C(6)-C(7)   | 1.500(4) | C(7)-C(8)   | 1.543(3) | C(8)-C(17)  | 1.473(4) |
| C(8)-C(9)   | 1.538(4) | C(10)-C(11) | 1.471(4) | C(11)-C(16) | 1.359(4) |
| C(11)-C(12) | 1.370(5) | C(12)-C(13) | 1.383(5) | C(13)-C(14) | 1.346(6) |
| C(14)-C(15) | 1.357(6) | C(15)-C(16) | 1.390(4) | C(18)-C(19) | 1.514(3) |
| C(19)-C(20) | 1.490(4) | C(20)-C(21) | 1.381(4) | C(20)-C(25) | 1.391(4) |
| C(21)-C(22) | 1.375(4) | C(22)-C(23) | 1.368(4) | C(23)-C(24) | 1.364(5) |
| C(24)-C(25) | 1.374(4) |             |          |             |          |

**Table 6** Selected Bond Angles (°) for Compound **5c**

| Angles         | (°)      | Angles          | (°)      |
|----------------|----------|-----------------|----------|
| C(1)-N(1)-C(9) | 119.6(3) | C(9)-N(2)-C(18) | 125.9(3) |
| O(1)-C(1)-N(1) | 119.5(3) | O(1)-C(1)-C(2)  | 118.6(3) |
| N(1)-C(1)-C(2) | 121.8(3) | C(1)-C(2)-C(10) | 107.2(3) |
| C(1)-C(2)-C(3) | 113.5(3) | C(10)-C(2)-C(3) | 109.4(3) |
| C(2)-C(3)-C(4) | 111.5(3) | C(2)-C(3)-C(8)  | 111.2(3) |
| C(4)-C(3)-C(8) | 112.4(2) | C(5)-C(4)-C(3)  | 111.2(3) |
| C(6)-C(5)-C(4) | 111.4(3) | C(7)-C(6)-C(5)  | 111.3(3) |
| O(2)-C(7)-C(6) | 109.6(2) | O(2)-C(7)-C(8)  | 108.5(3) |

|                   |          |                   |          |
|-------------------|----------|-------------------|----------|
| C(6)-C(7)-C(8)    | 111.4(3) | C(17)-C(8)-C(3)   | 110.2(3) |
| C(17)-C(8)-C(9)   | 106.8(3) | C(3)-C(8)-C(9)    | 106.6(2) |
| C(17)-C(8)-C(7)   | 111.2(3) | C(3)-C(8)-C(7)    | 107.3(3) |
| C(9)-C(8)-C(7)    | 114.6(3) | N(2)-C(9)-N(1)    | 119.7(3) |
| N(2)-C(9)-C(8)    | 116.8(3) | N(1)-C(9)-C(8)    | 123.5(3) |
| O(3)-C(10)-C(11)  | 120.9(4) | O(3)-C(10)-C(2)   | 116.8(3) |
| C(11)-C(10)-C(2)  | 122.3(4) | C(16)-C(11)-C(12) | 118.0(4) |
| C(16)-C(11)-C(10) | 123.1(4) | C(12)-C(11)-C(10) | 119.0(4) |
| C(11)-C(12)-C(13) | 121.2(5) | C(14)-C(13)-C(12) | 120.2(6) |
| C(13)-C(14)-C(15) | 119.6(6) | C(14)-C(15)-C(16) | 120.2(5) |
| C(11)-C(16)-C(15) | 120.8(4) | N(3)-C(17)-C(8)   | 179.0(4) |
| N(2)-C(18)-C(19)  | 109.7(3) | C(20)-C(19)-C(18) | 115.9(3) |
| C(21)-C(20)-C(25) | 117.3(4) | C(21)-C(20)-C(19) | 122.7(4) |
| C(25)-C(20)-C(19) | 120.0(4) | C(22)-C(21)-C(20) | 121.6(4) |
| C(23)-C(22)-C(21) | 120.0(4) | C(24)-C(23)-C(22) | 119.5(4) |
| C(23)-C(24)-C(25) | 120.8(4) | C(24)-C(25)-C(20) | 120.7(4) |

## 5. $^1\text{H}$ NMR and $^{13}\text{C}$ NMR Spectra of all compounds

### $^1\text{H}$ NMR of compound **4a**

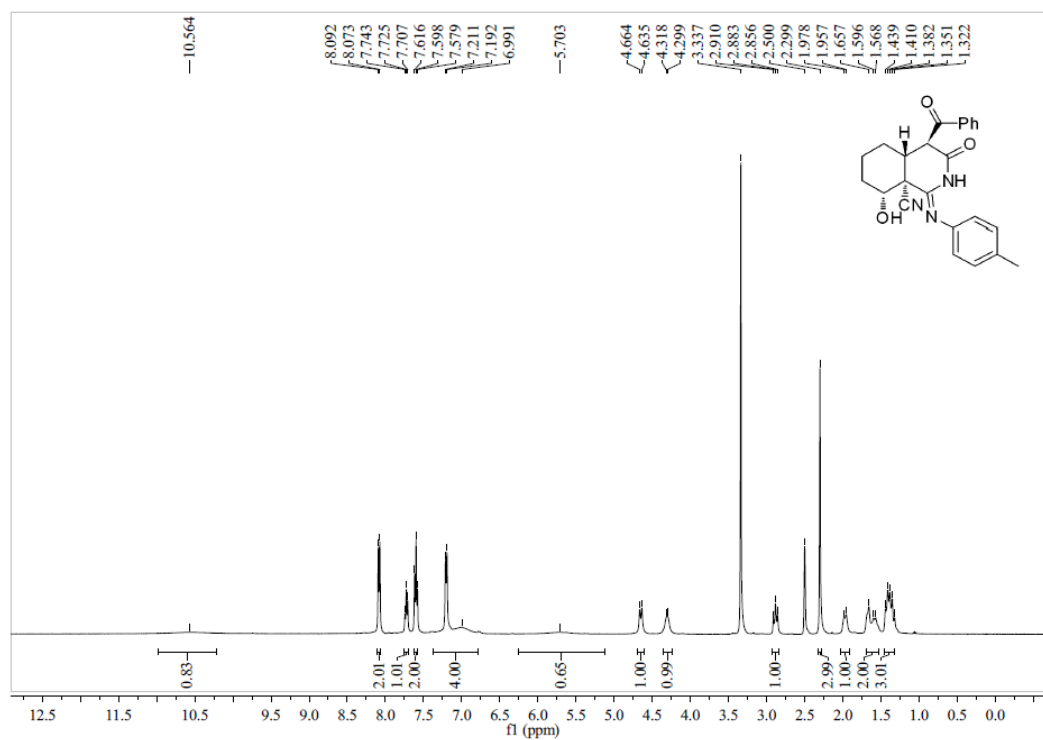

### $^{13}\text{C}$ NMR of compound **4a**

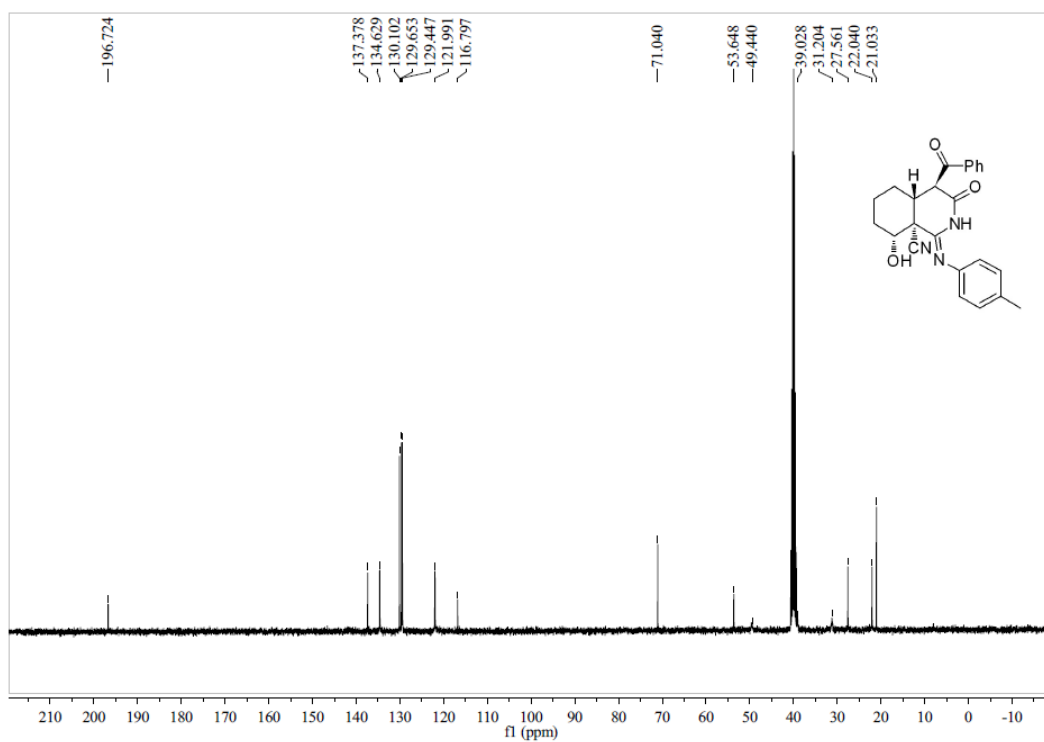

### $^1\text{H}$ NMR of compound **4b**

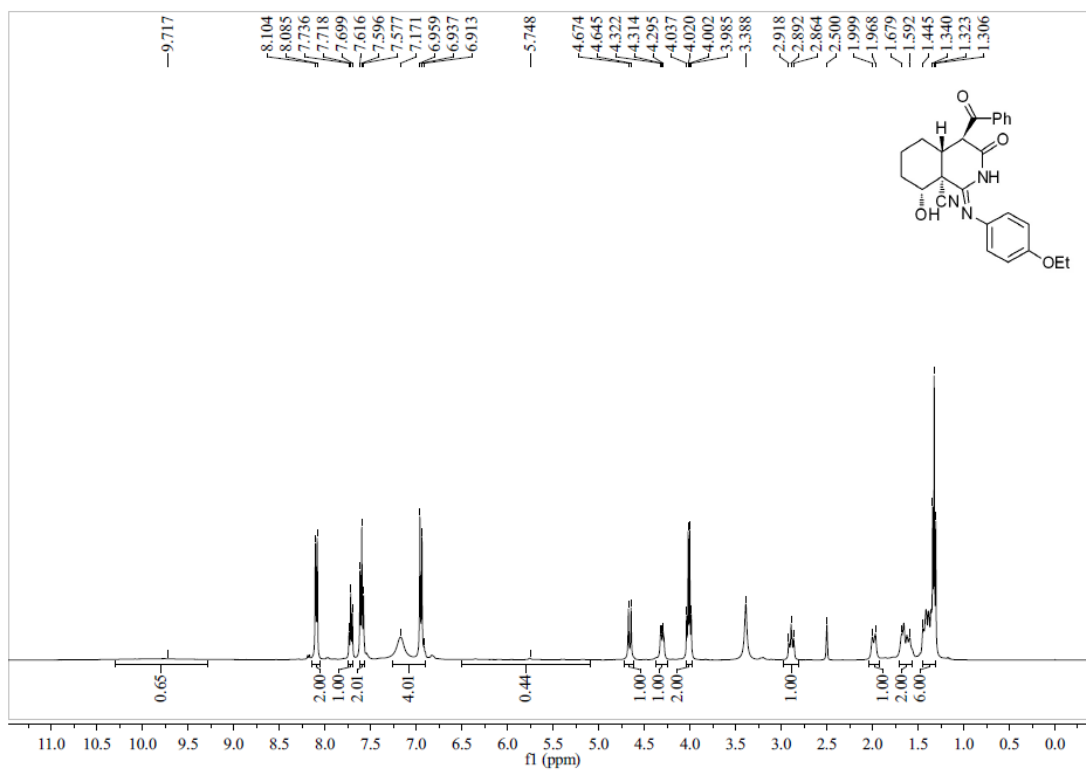

### $^{13}\text{C}$ NMR of compound **4b**

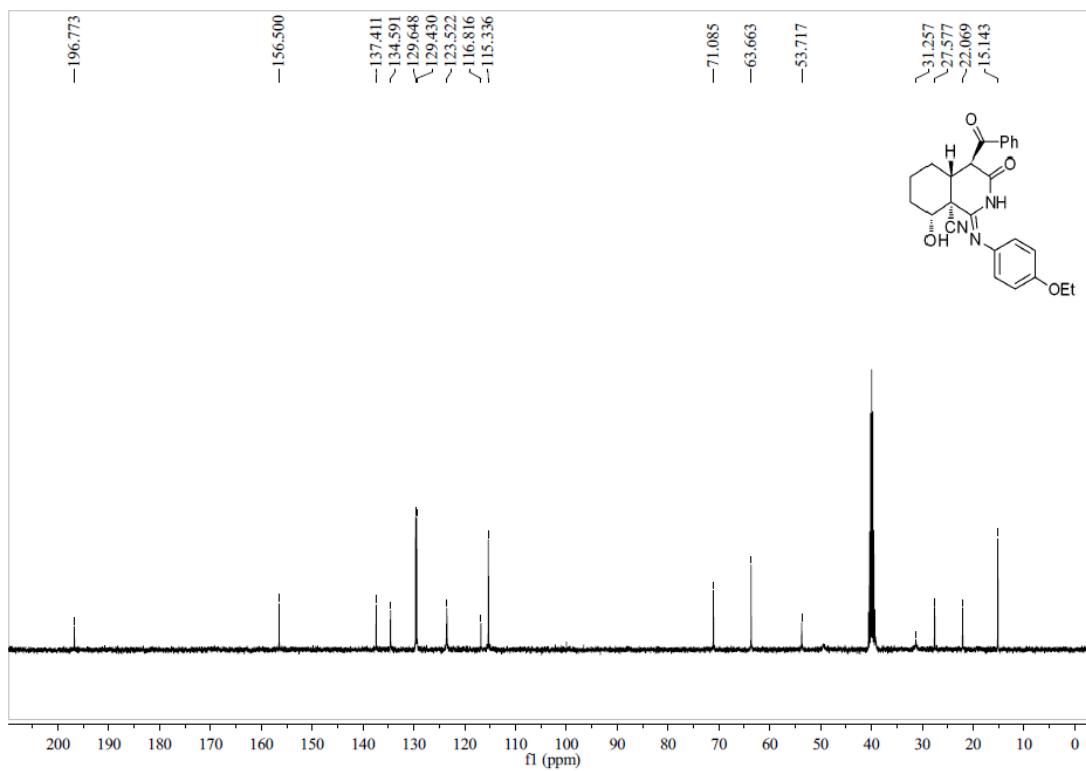



### $^1\text{H}$ NMR of compound **4c**

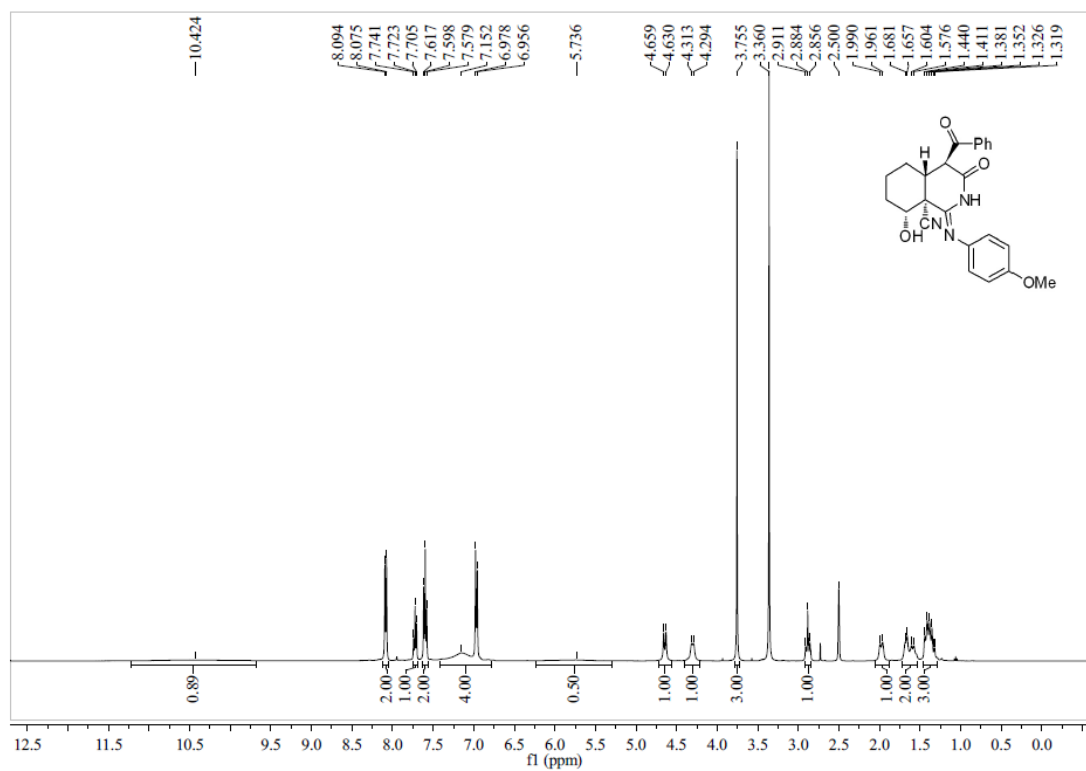

### $^{13}\text{C}$ NMR of compound **4c**

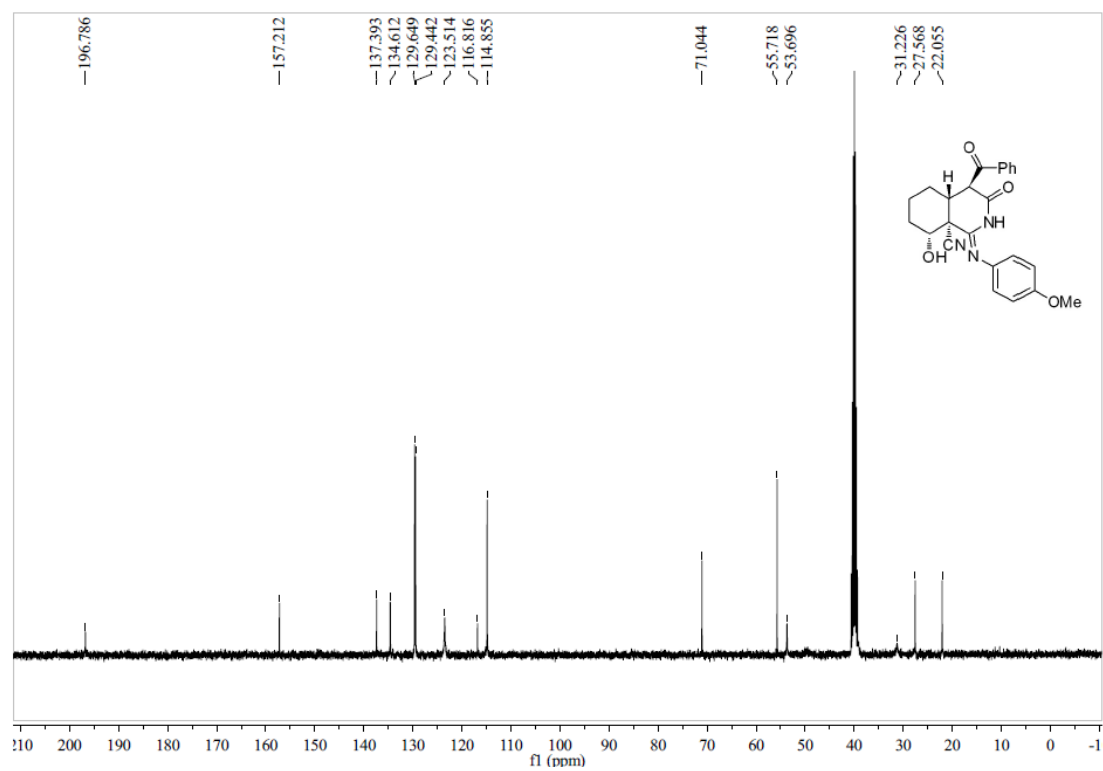

### <sup>1</sup>H NMR of compound **4d**

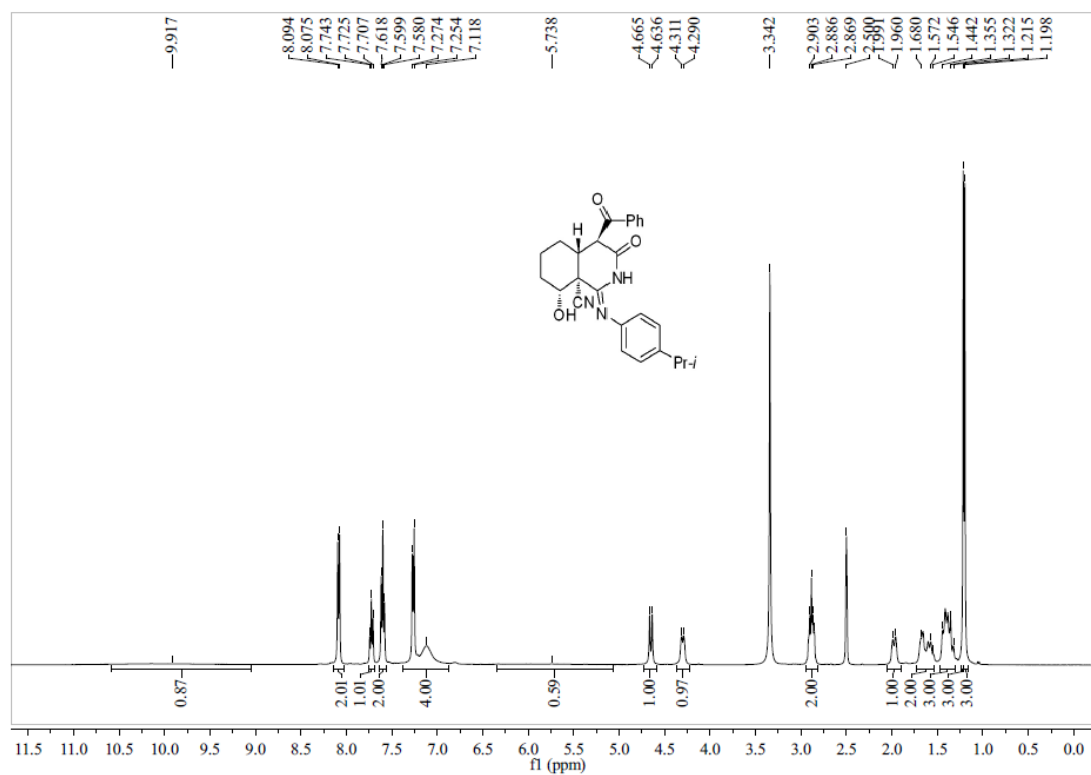

### <sup>13</sup>C NMR of compound **4d**

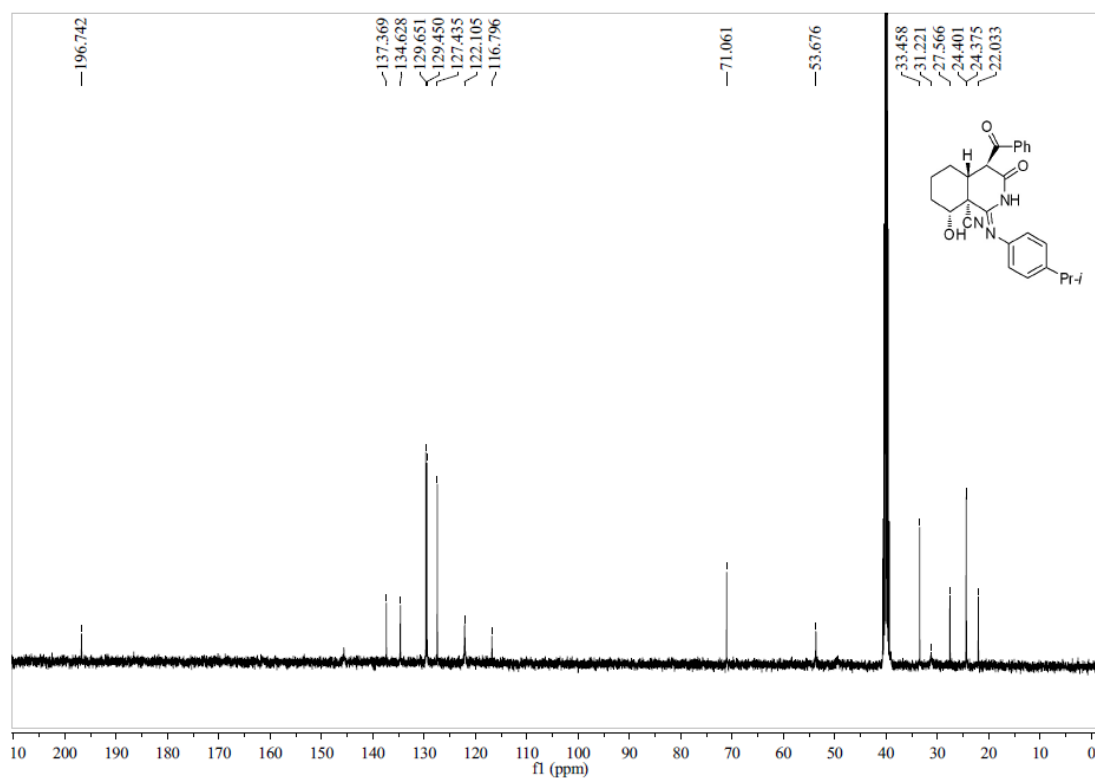

### $^1\text{H}$ NMR of compound **4e**

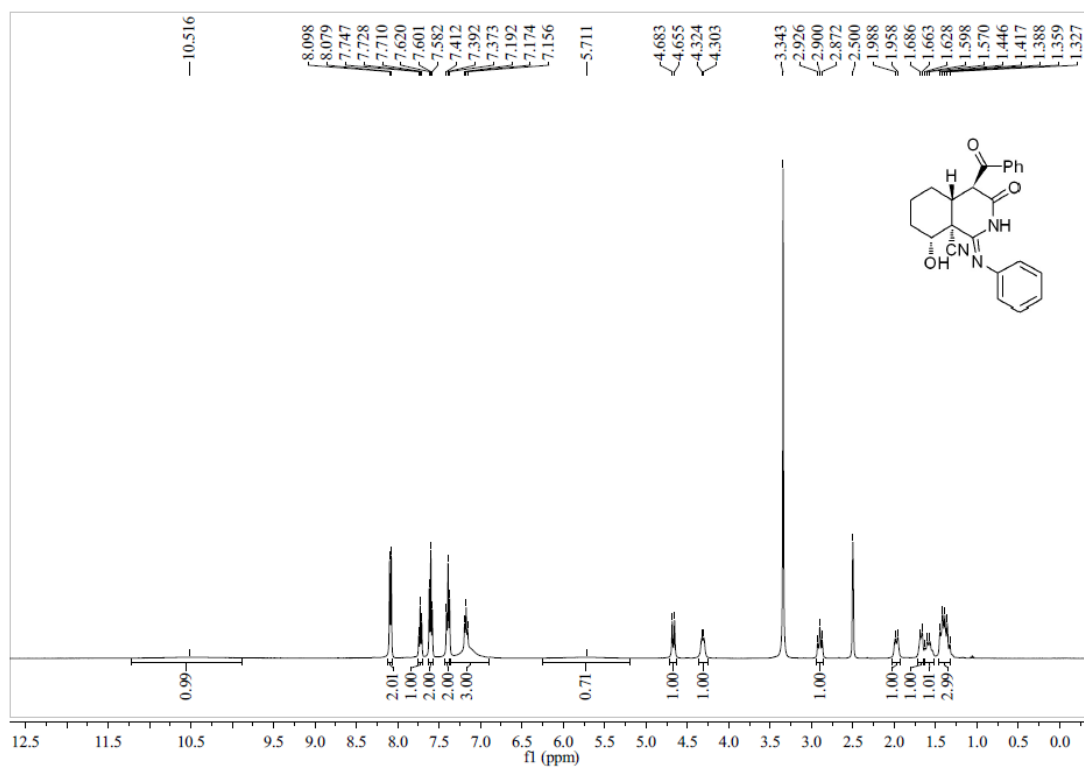

### $^{13}\text{C}$ NMR of compound **4e**

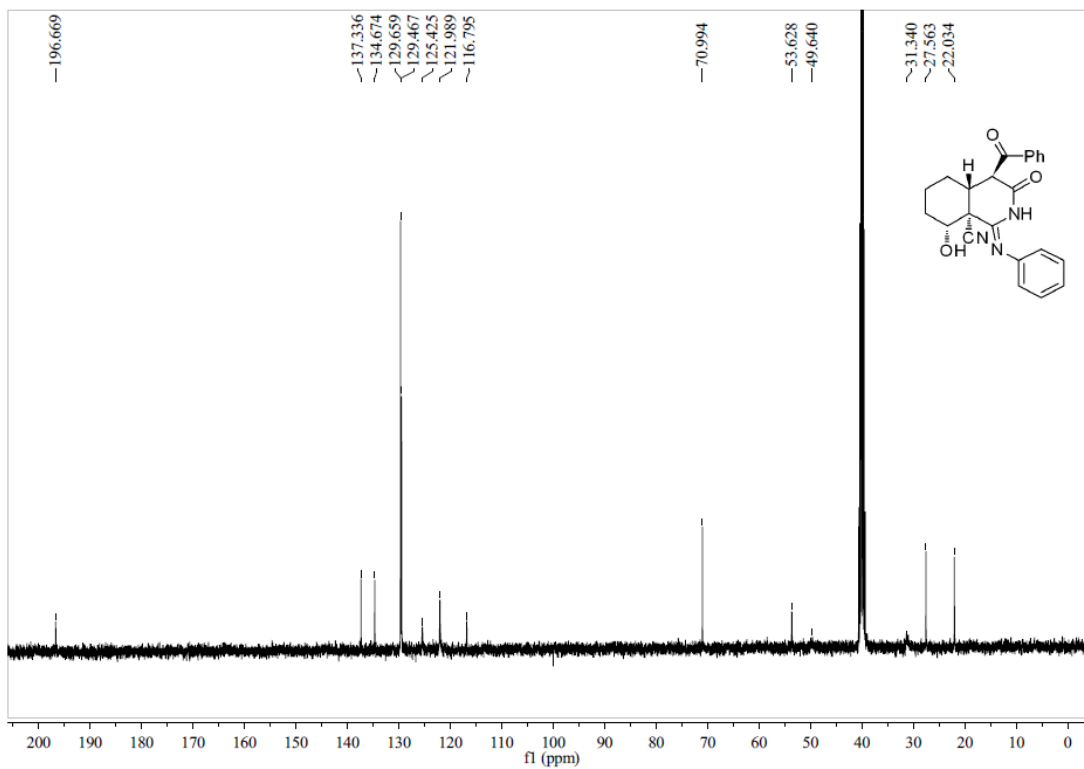

### $^1\text{H}$ NMR of compound **4f**

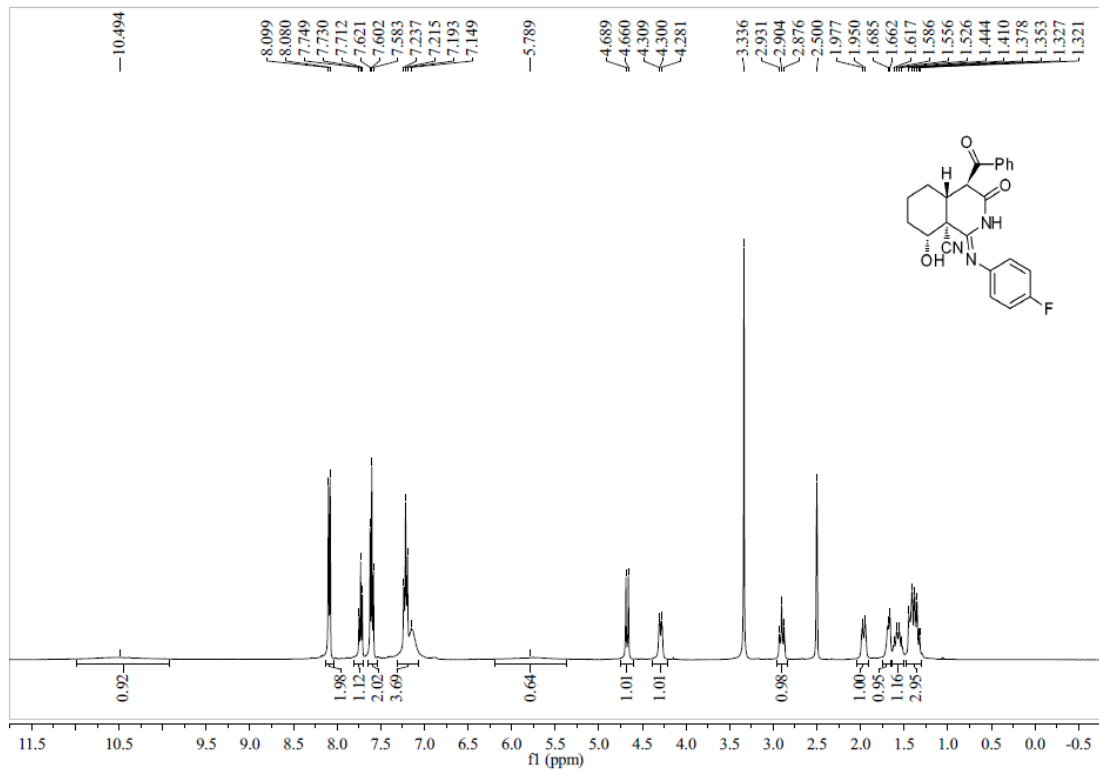

### $^{13}\text{C}$ NMR of compound **4f**

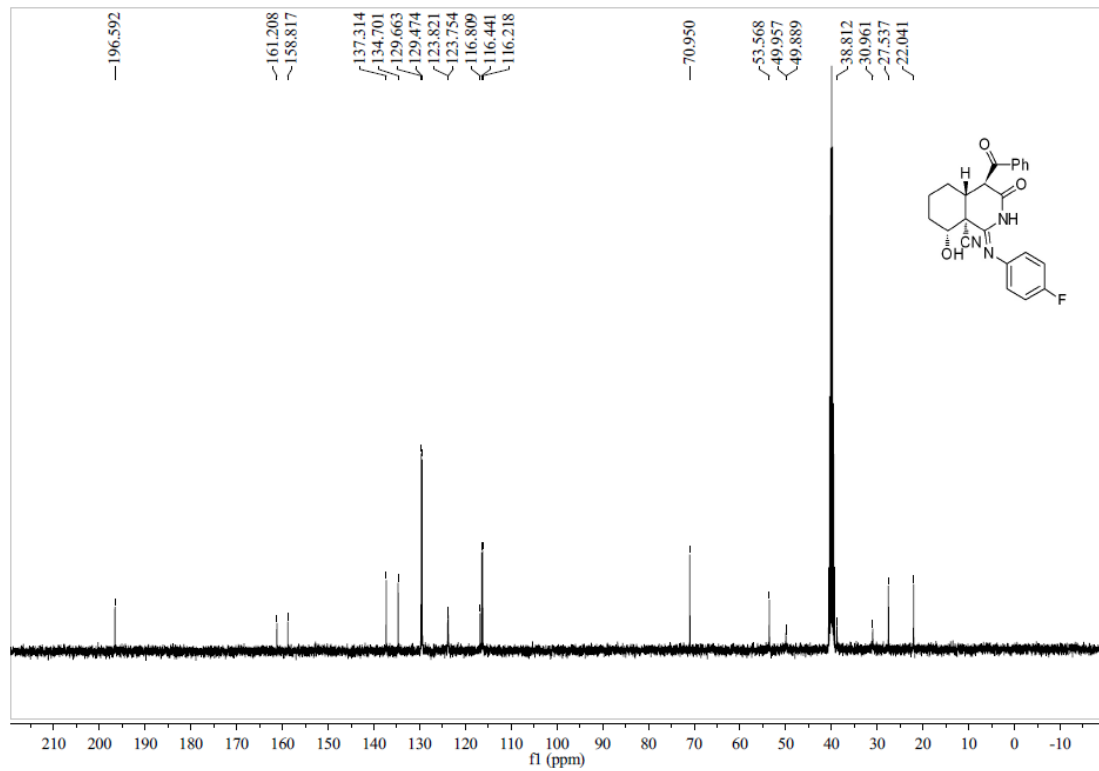

### $^1\text{H}$ NMR of compound **4g**

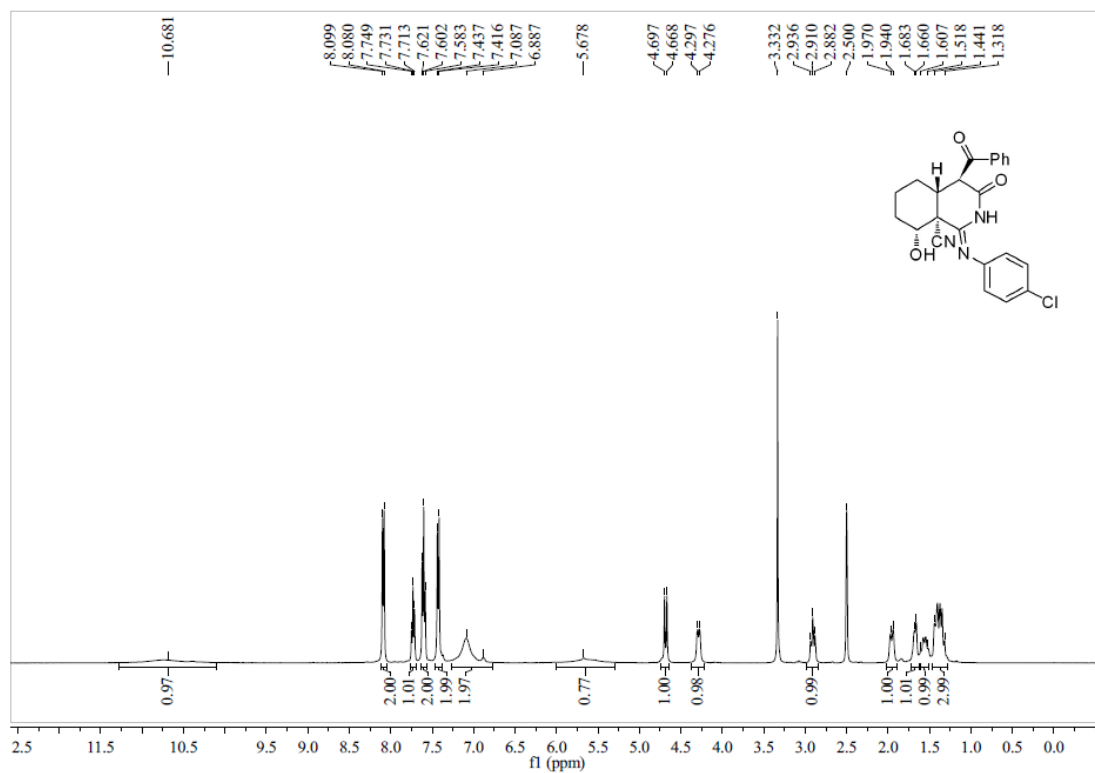

### $^{13}\text{C}$ NMR of compound **4g**

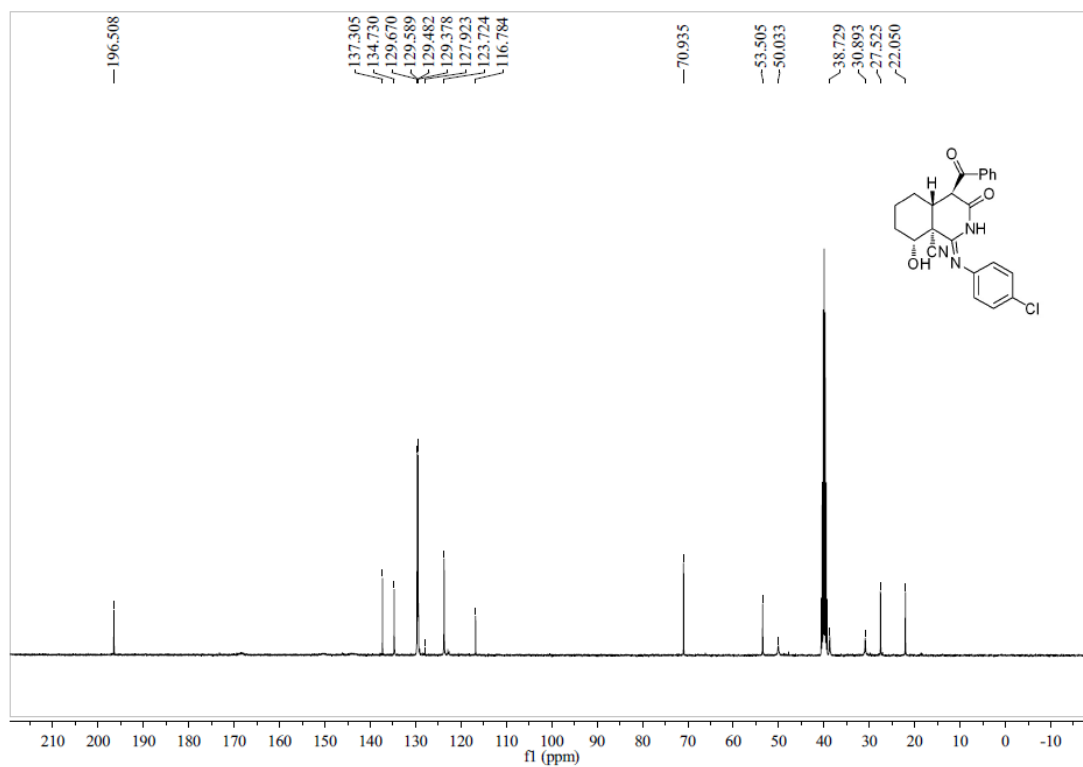

### <sup>1</sup>H NMR of compound **4h**

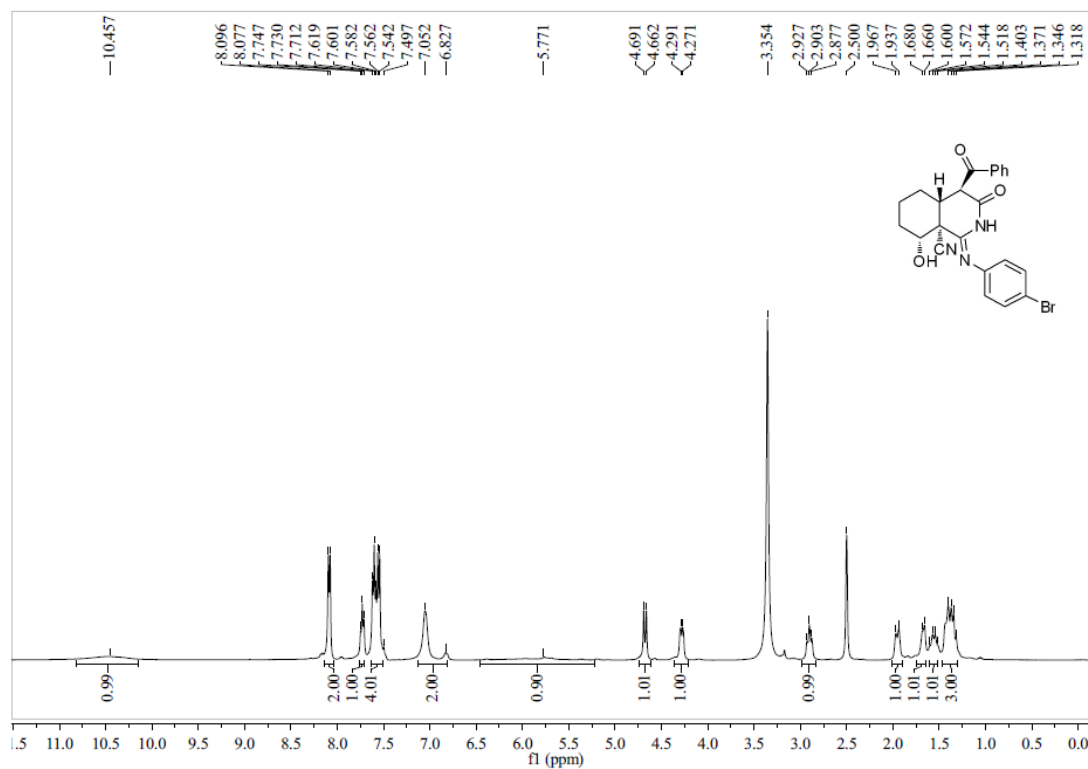

### <sup>13</sup>C NMR of compound **4h**

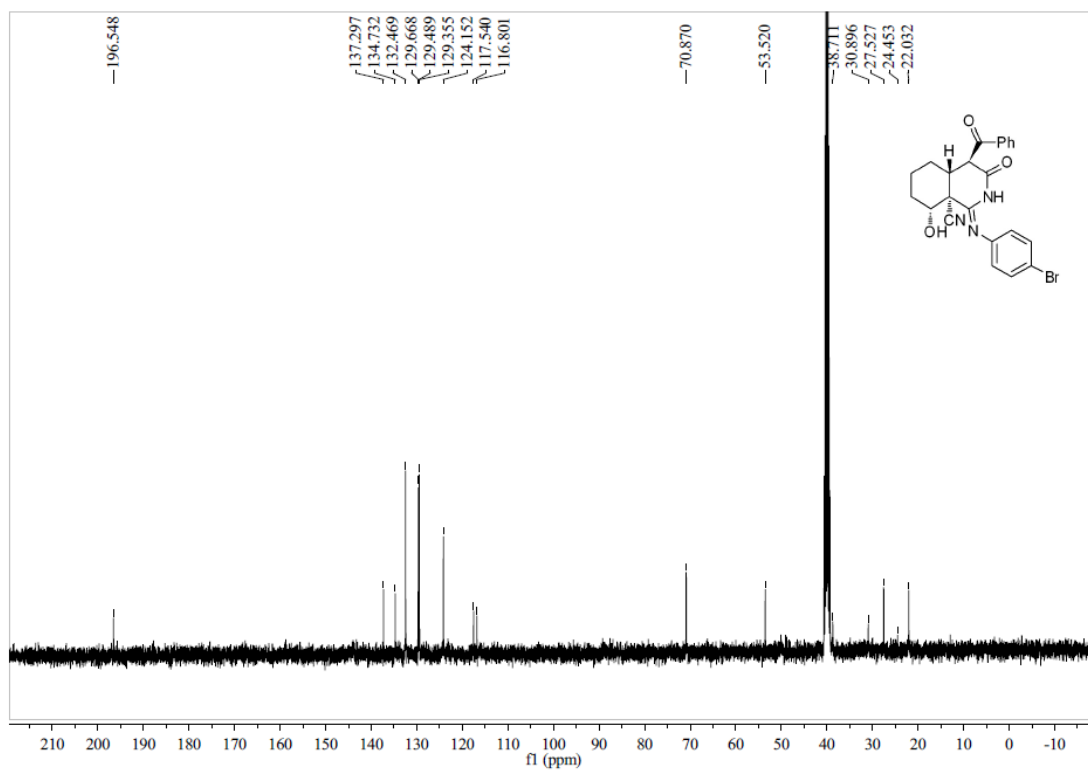

### <sup>1</sup>H NMR of compound **4i**

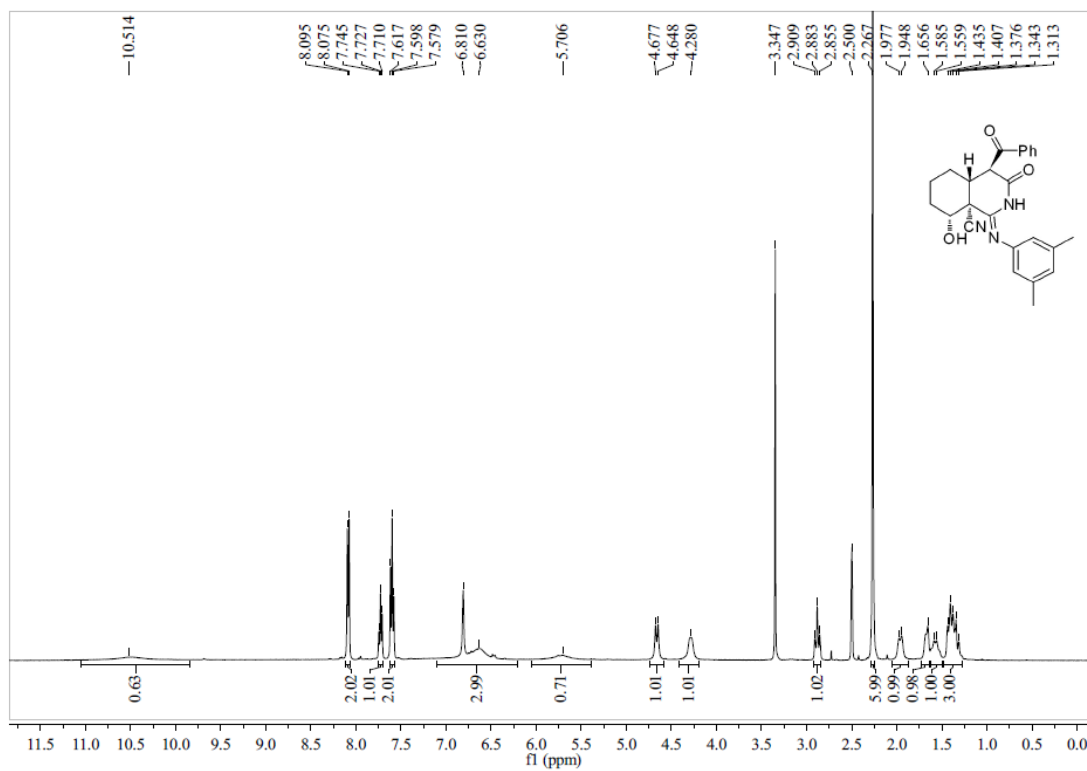

### <sup>13</sup>C NMR of compound **4i**

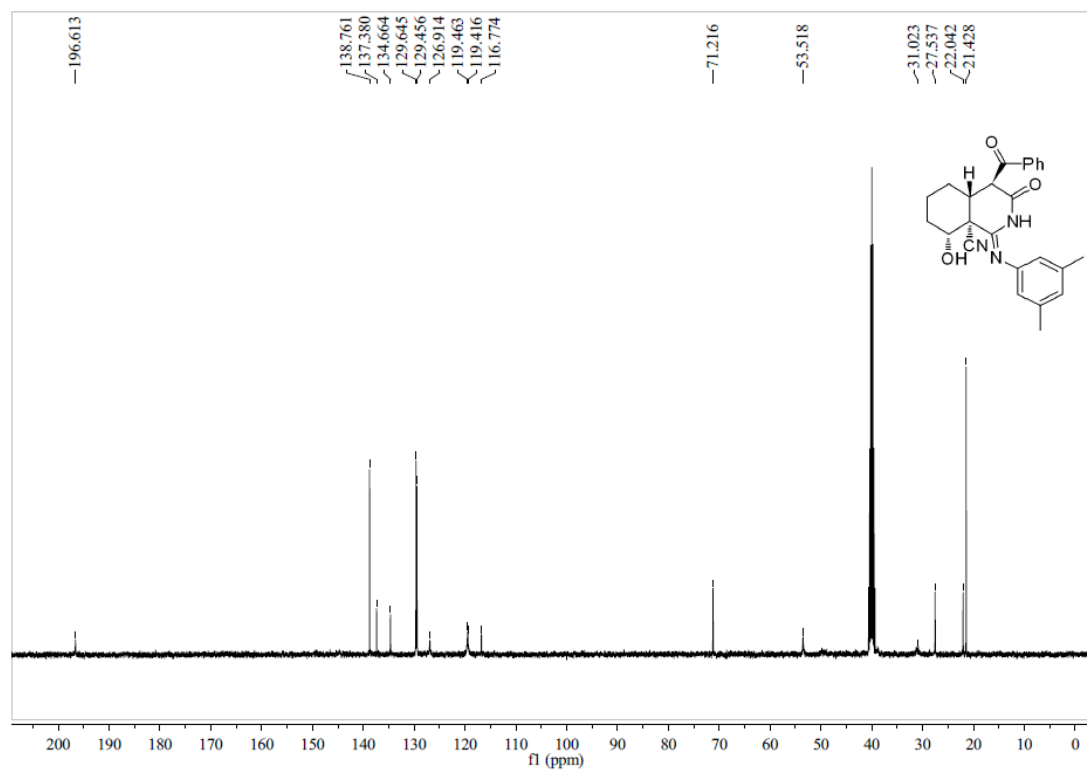

<sup>1</sup>H NMR of compound **4j**

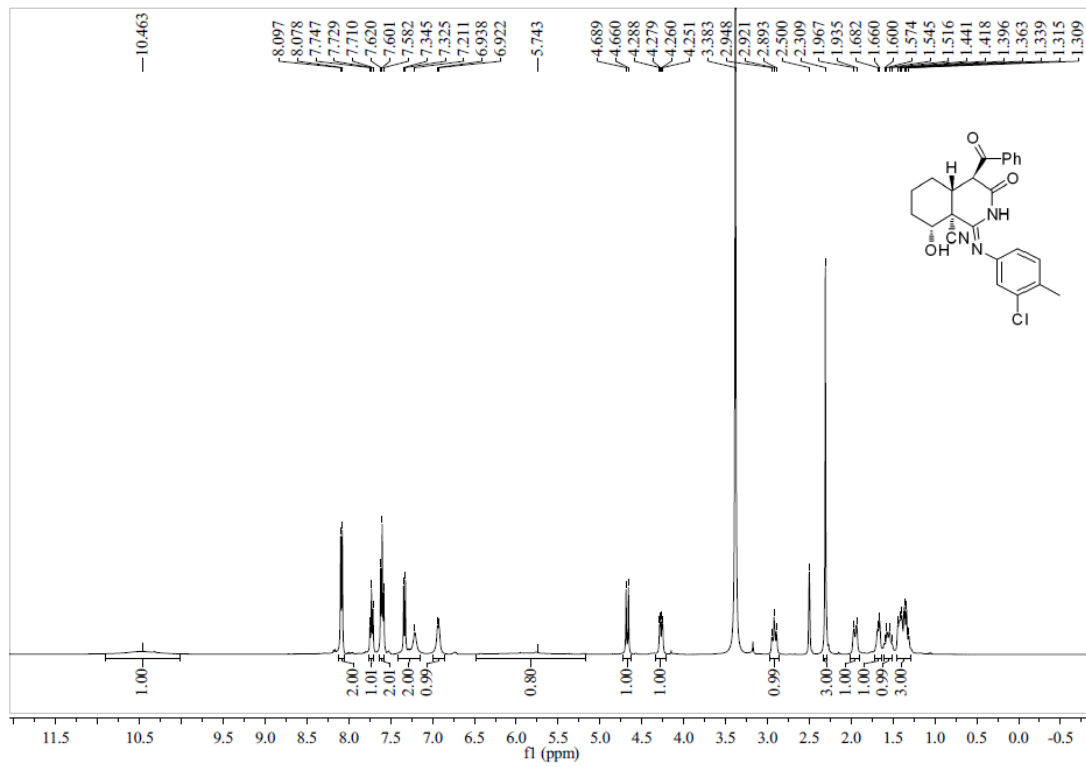

<sup>13</sup>C NMR of compound **4j**

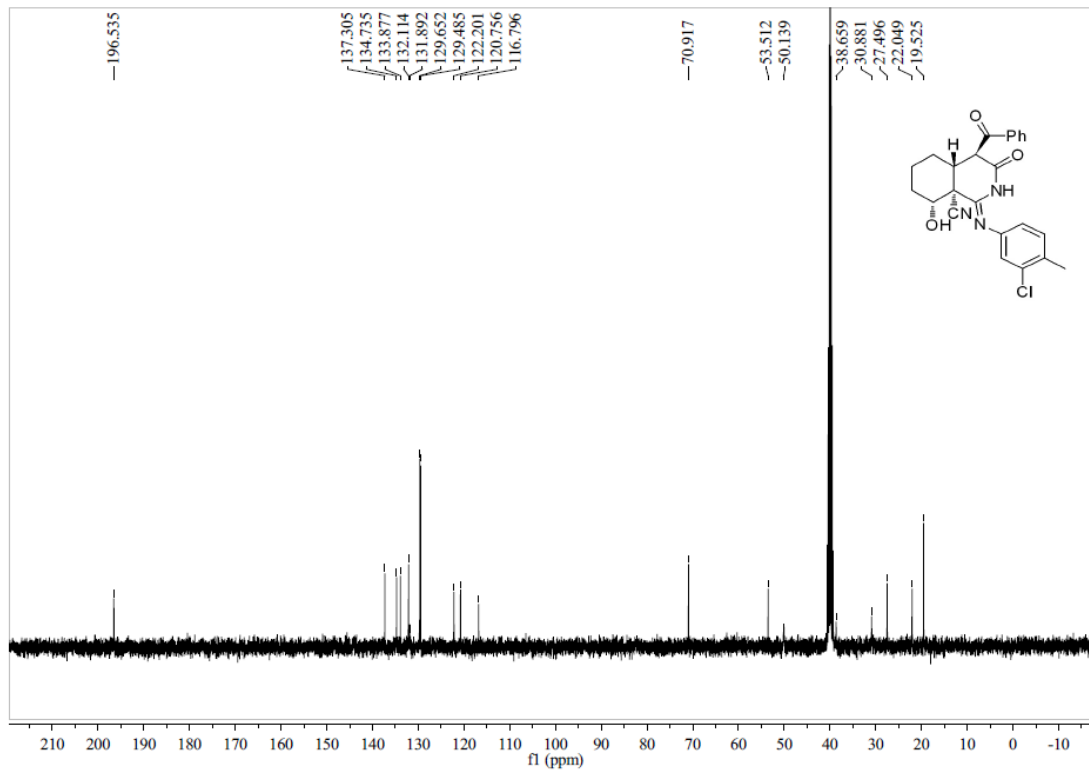



### <sup>1</sup>H NMR of compound **4k**

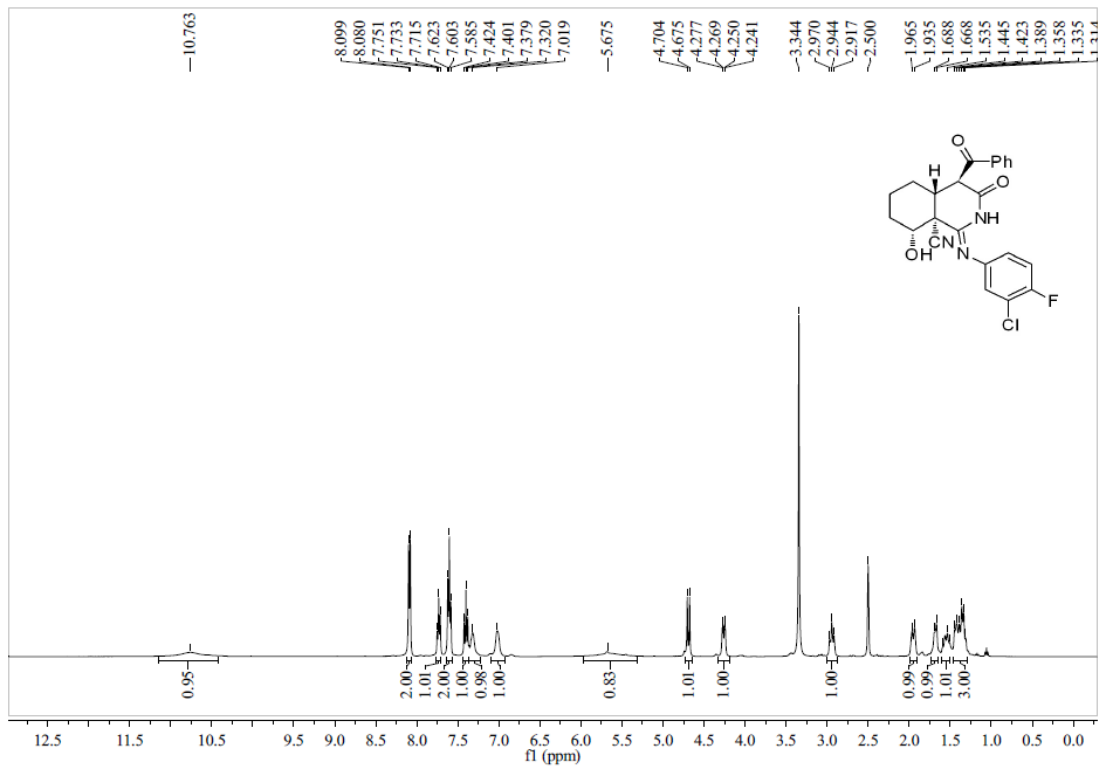

### <sup>13</sup>C NMR of compound **4k**

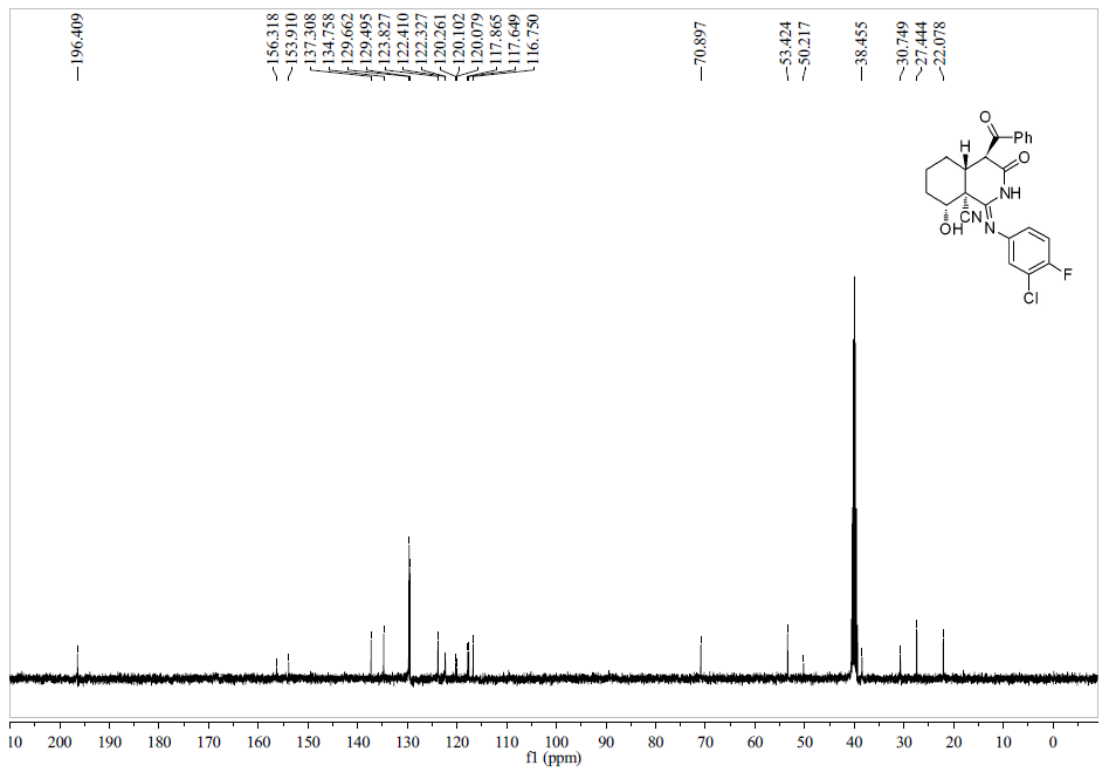

### $^1\text{H}$ NMR of compound **41**

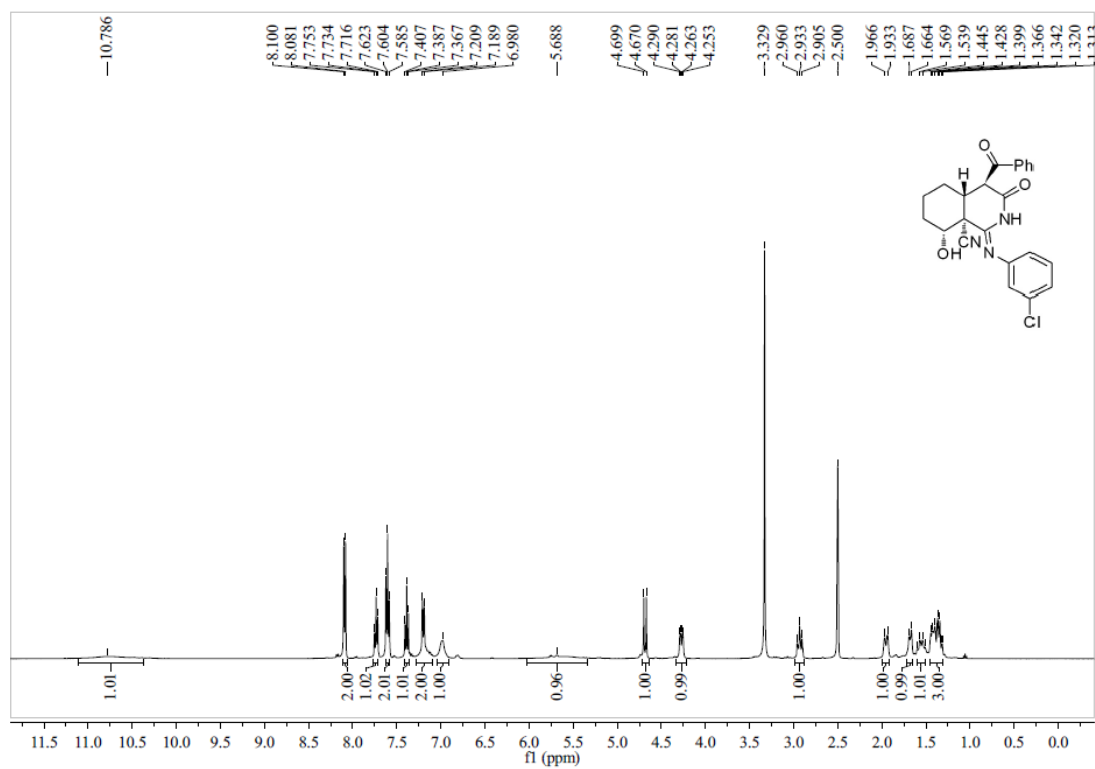

### $^{13}\text{C}$ NMR of compound **41**

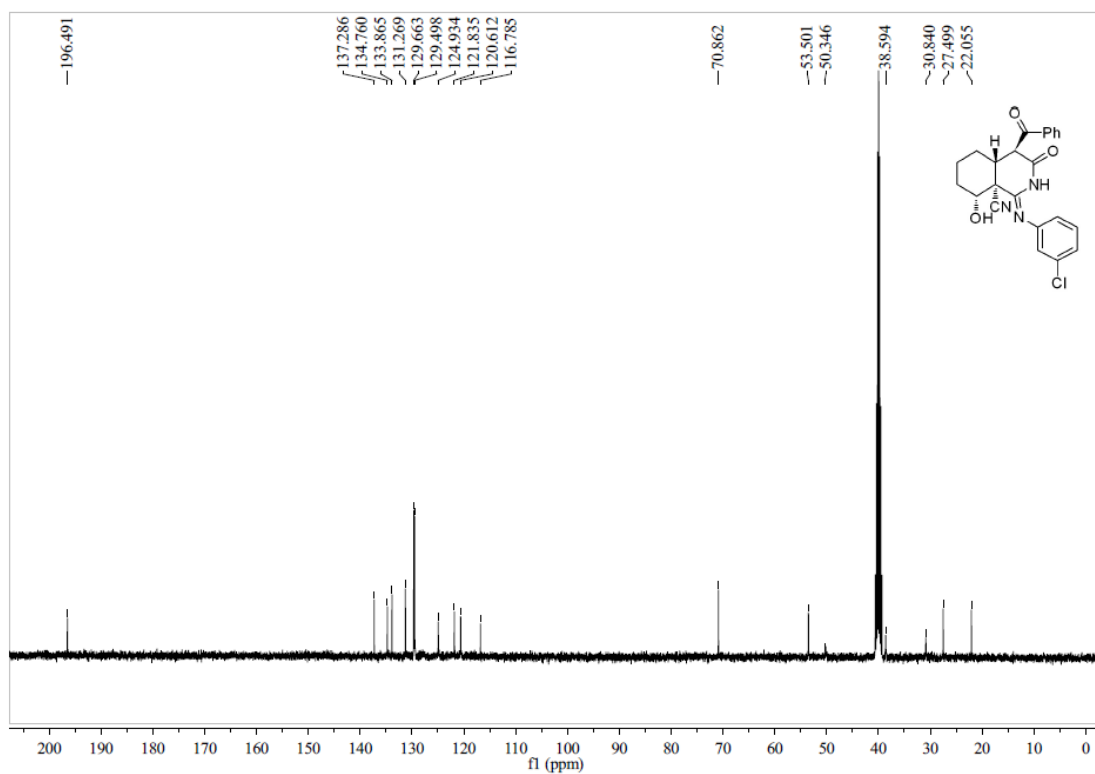

### <sup>1</sup>H NMR of compound **4m**

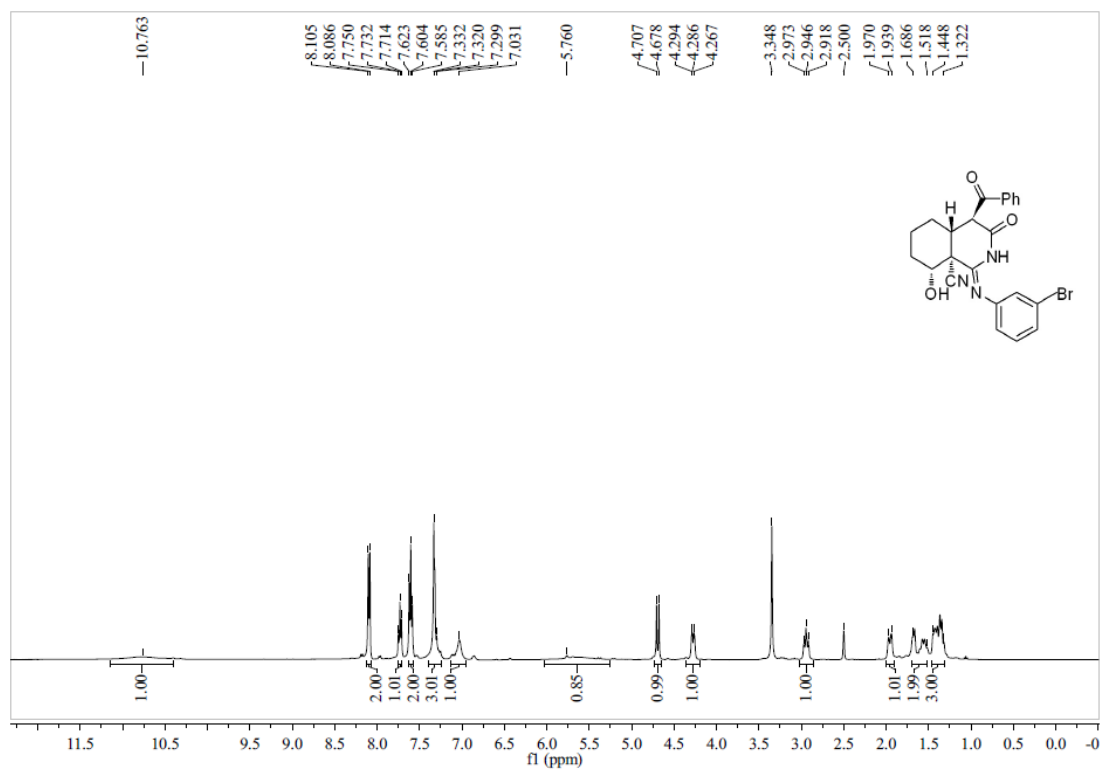

### <sup>13</sup>C NMR of compound **4m**

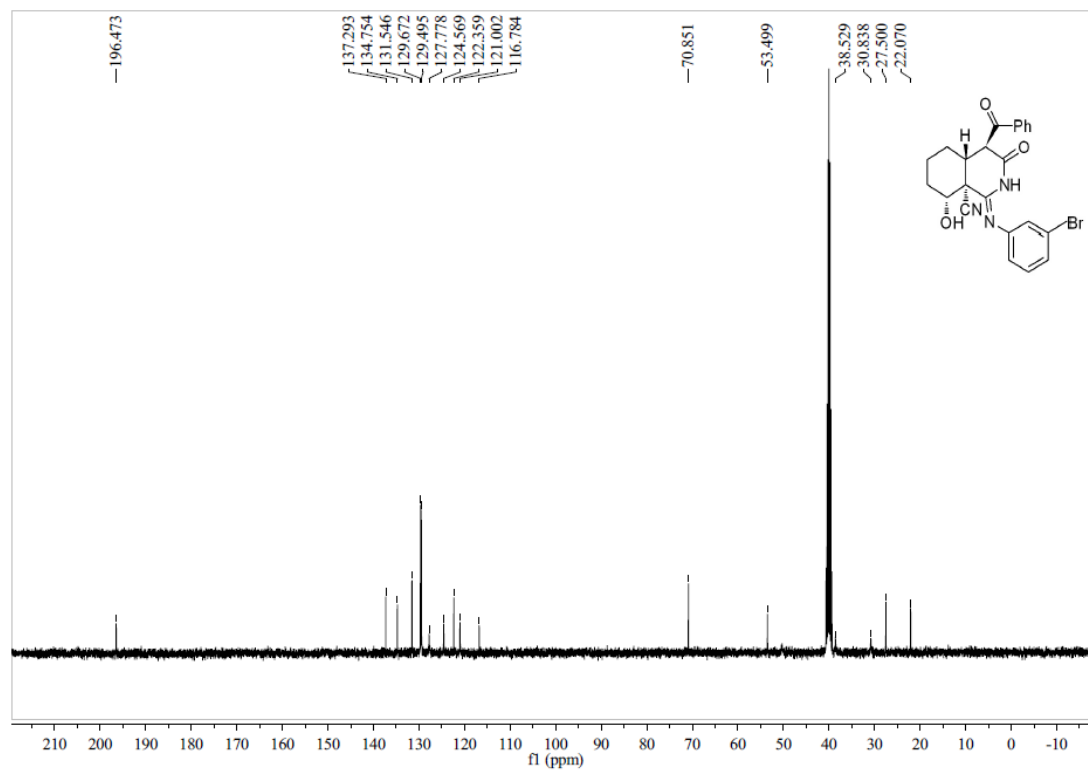

### $^1\text{H}$ NMR of compound **4n**

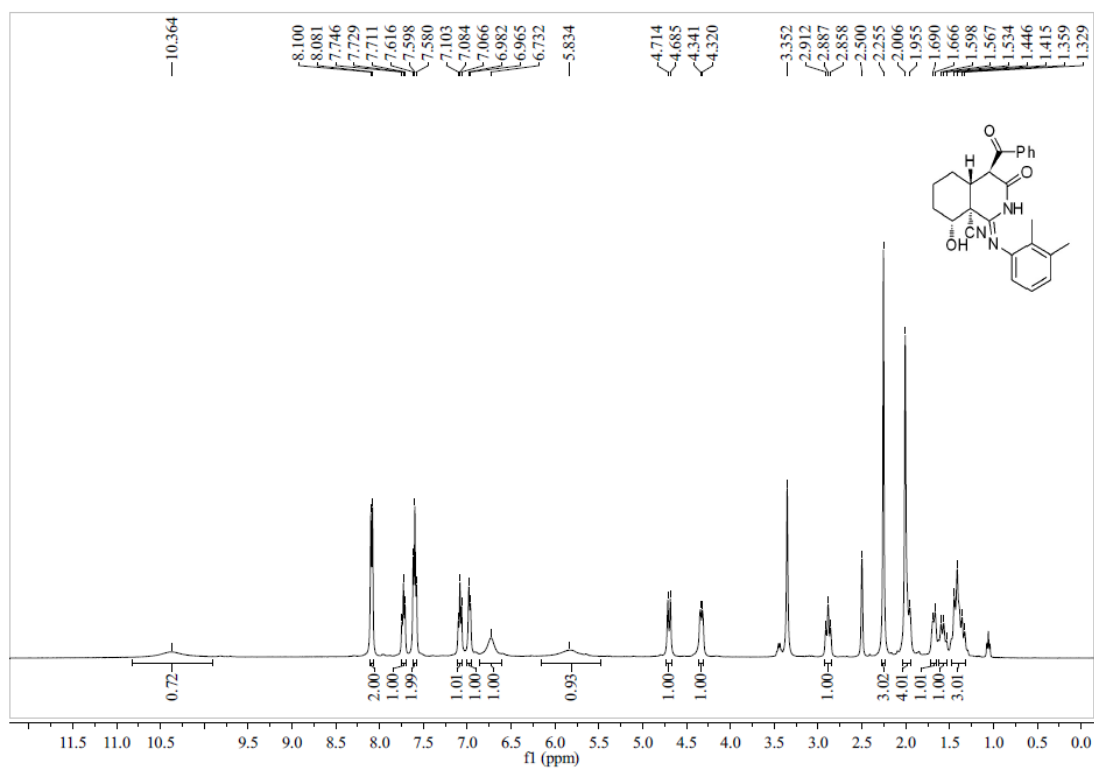

### $^{13}\text{C}$ NMR of compound **4n**

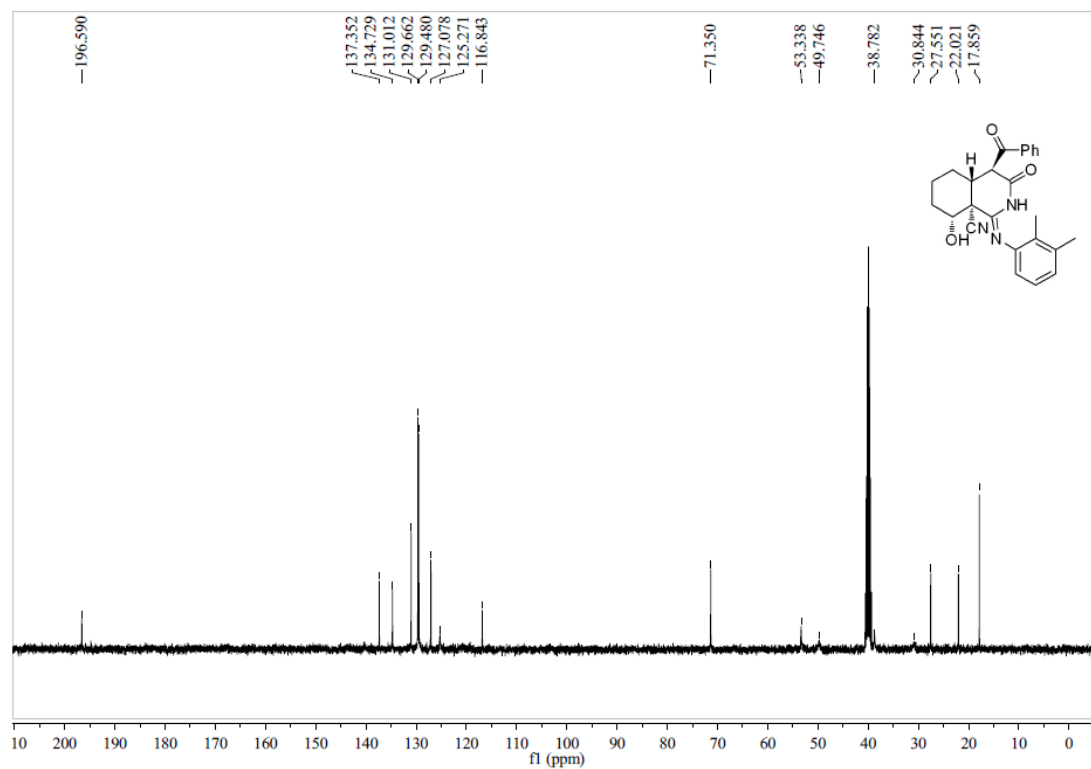

### $^1\text{H}$ NMR of compound **4o**

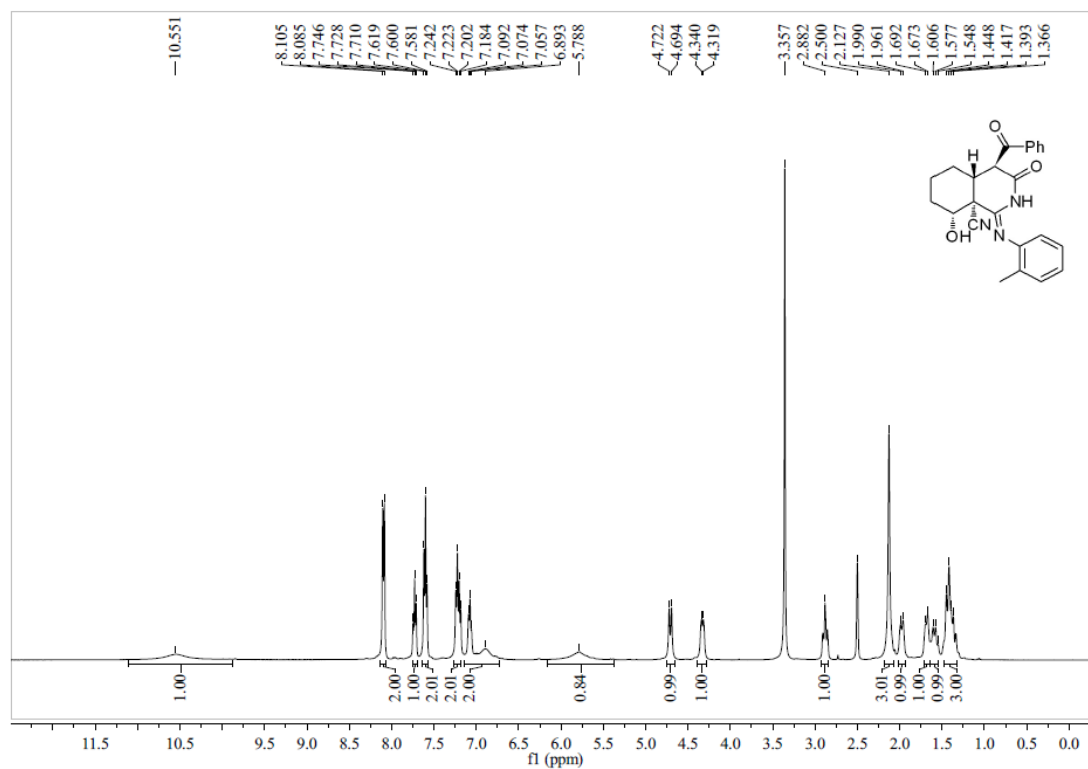

### $^{13}\text{C}$ NMR of compound **4o**

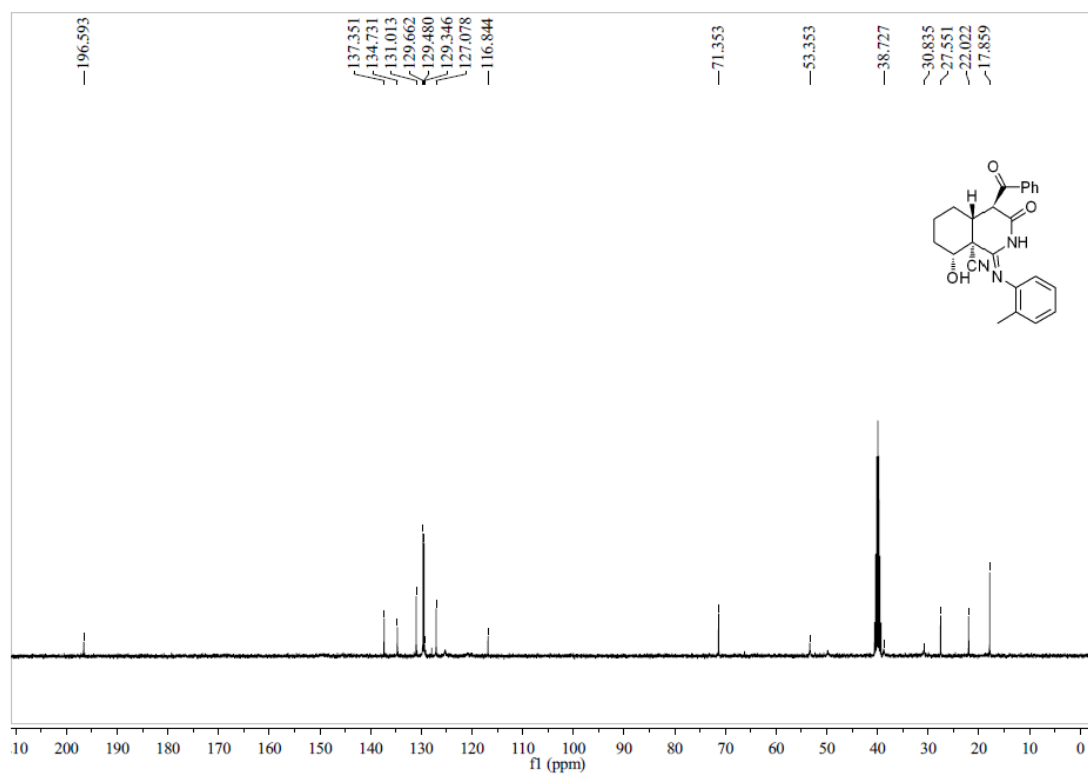

### $^1\text{H}$ NMR of compound **4p**

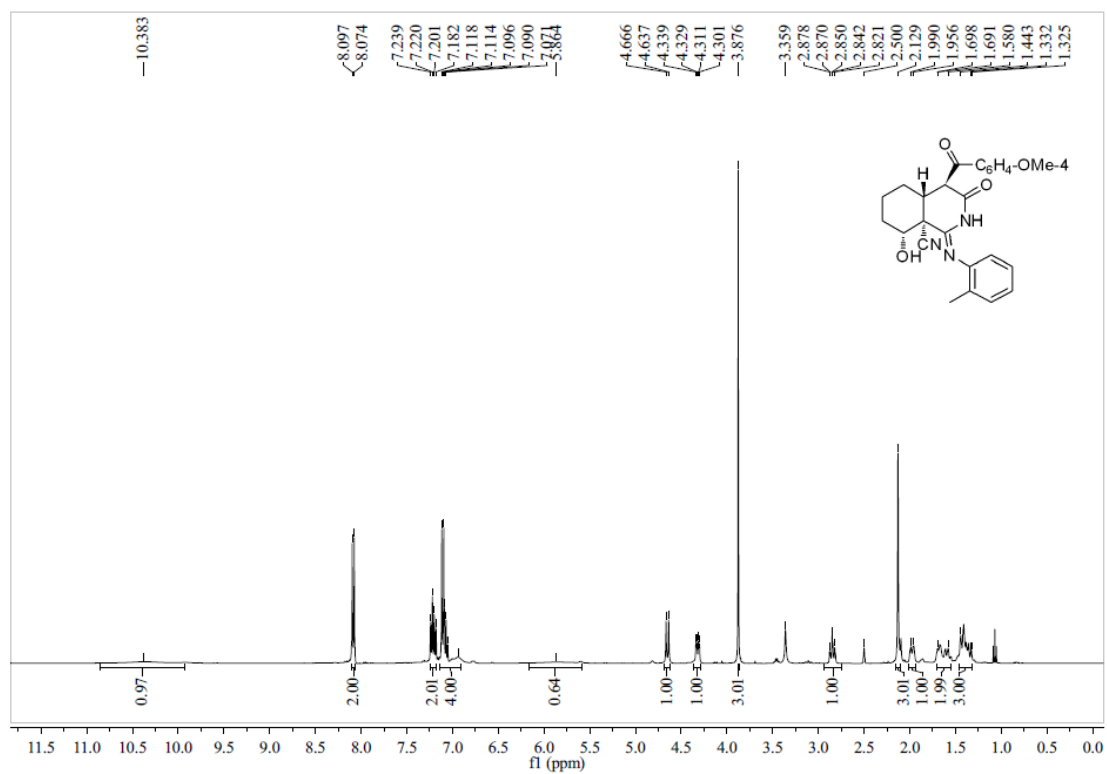

### $^{13}\text{C}$ NMR of compound **4p**

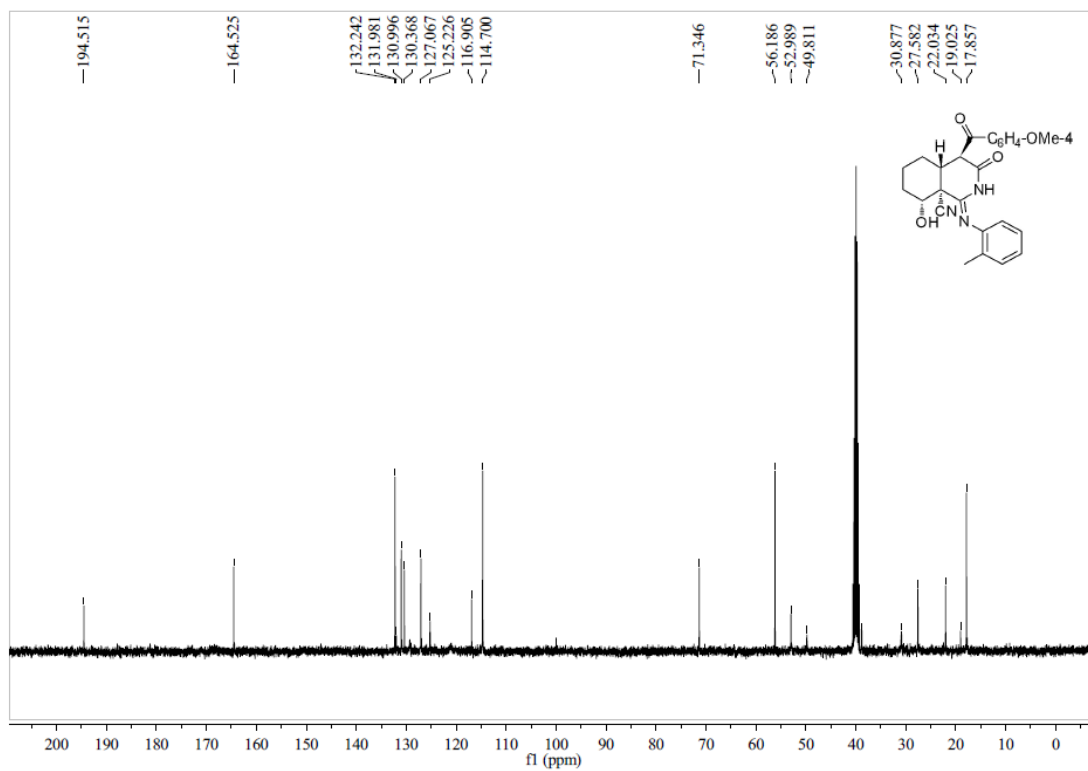

### <sup>1</sup>H NMR of compound **4q**

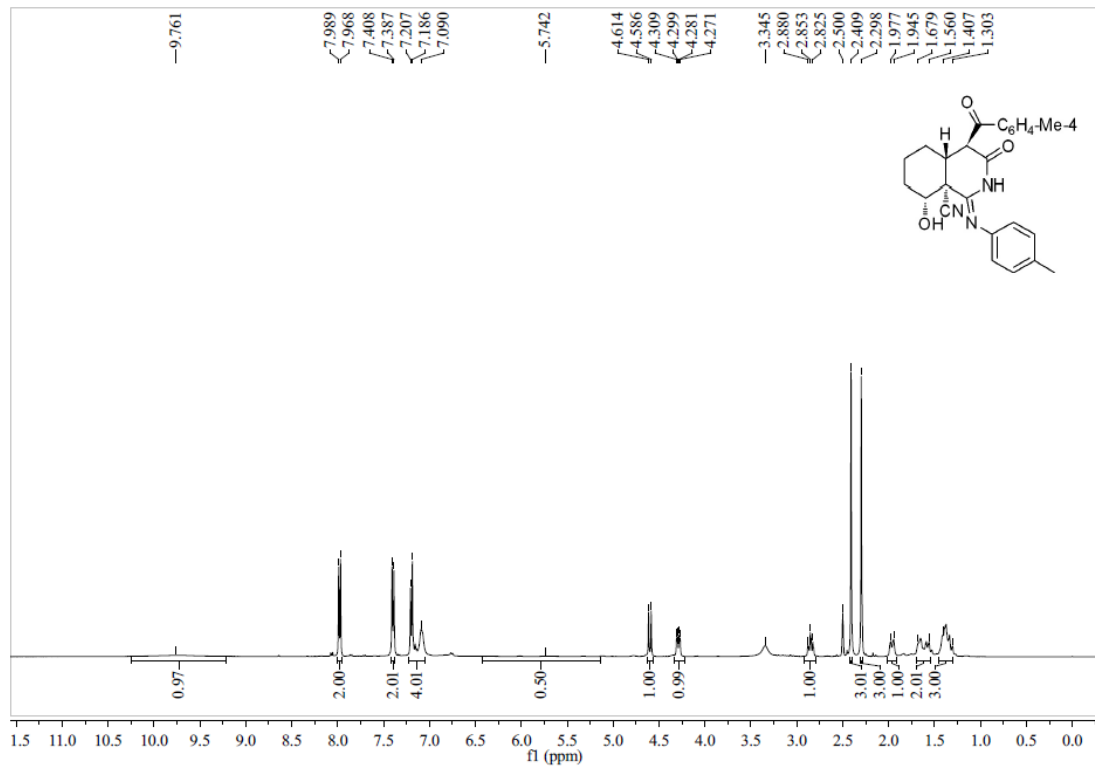

### <sup>13</sup>C NMR of compound **4q**

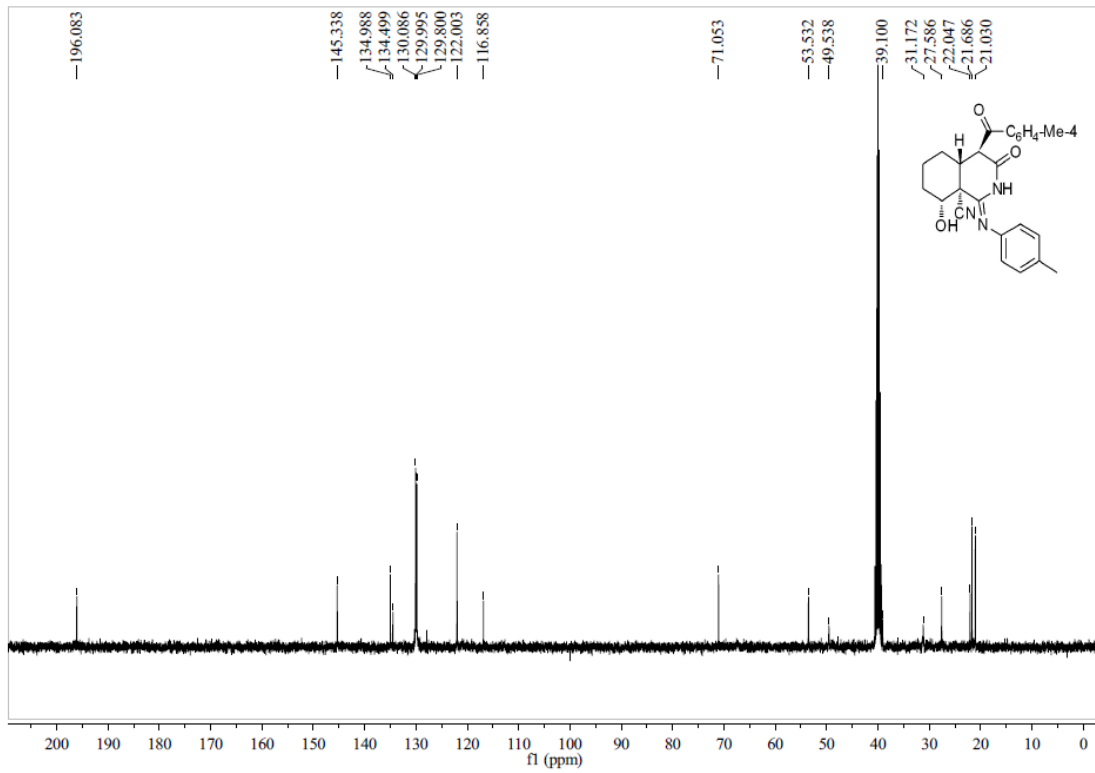

### <sup>1</sup>H NMR of compound 4r

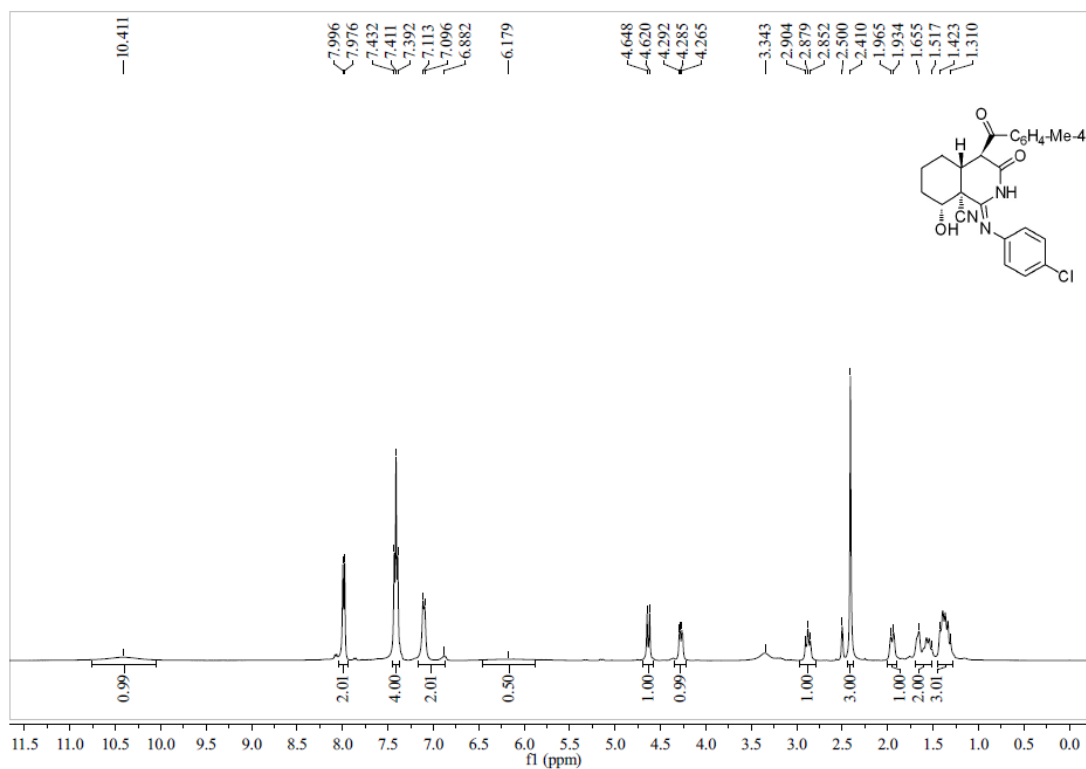

### <sup>13</sup>C NMR of compound 4r

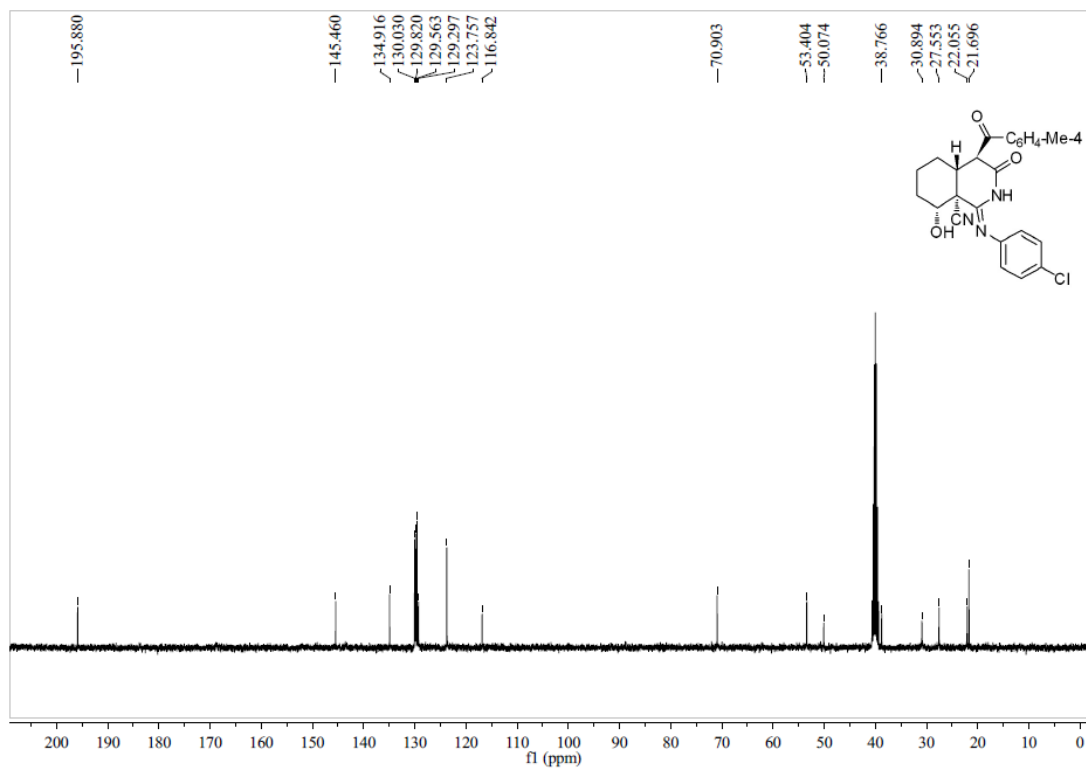



### $^1\text{H}$ NMR of compound **4s**

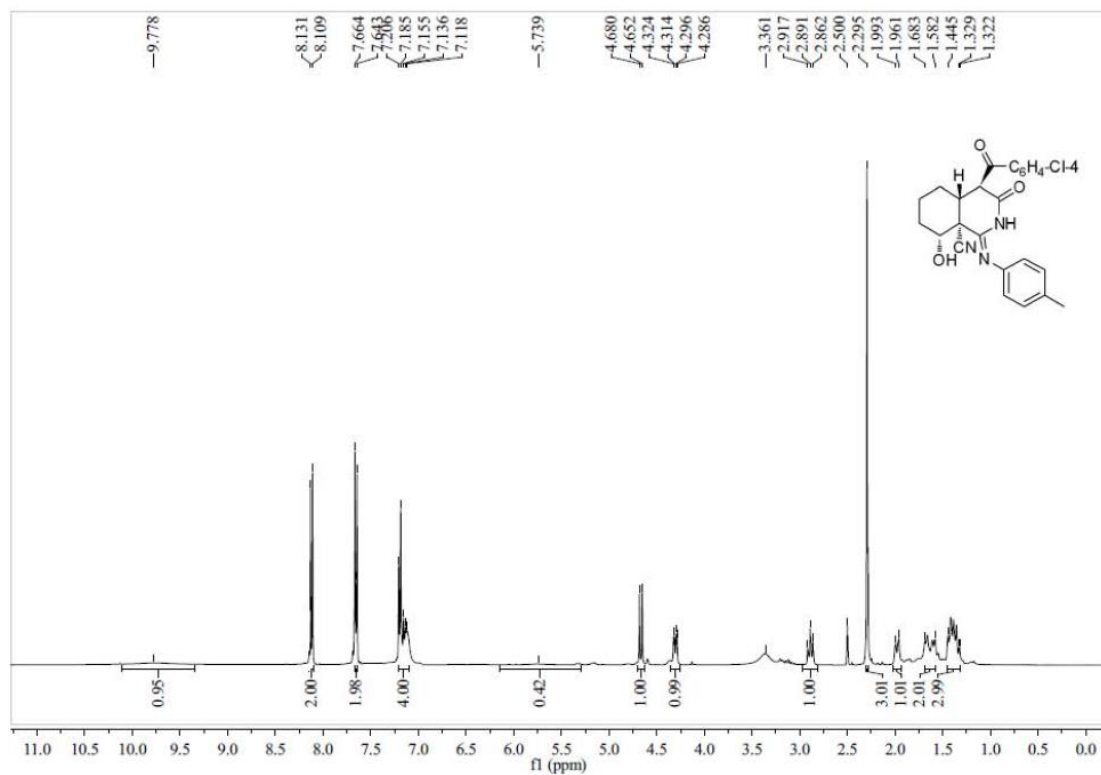

### $^{13}\text{C}$ NMR of compound **4s**

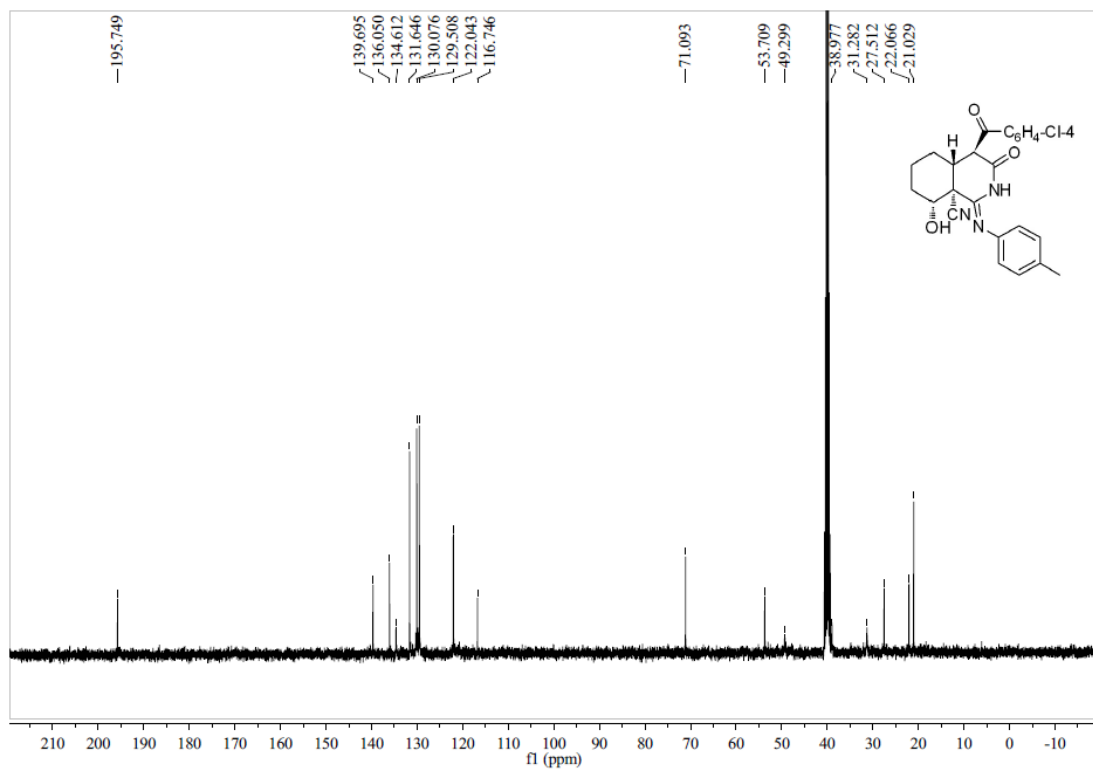

### <sup>1</sup>H NMR of compound 4t

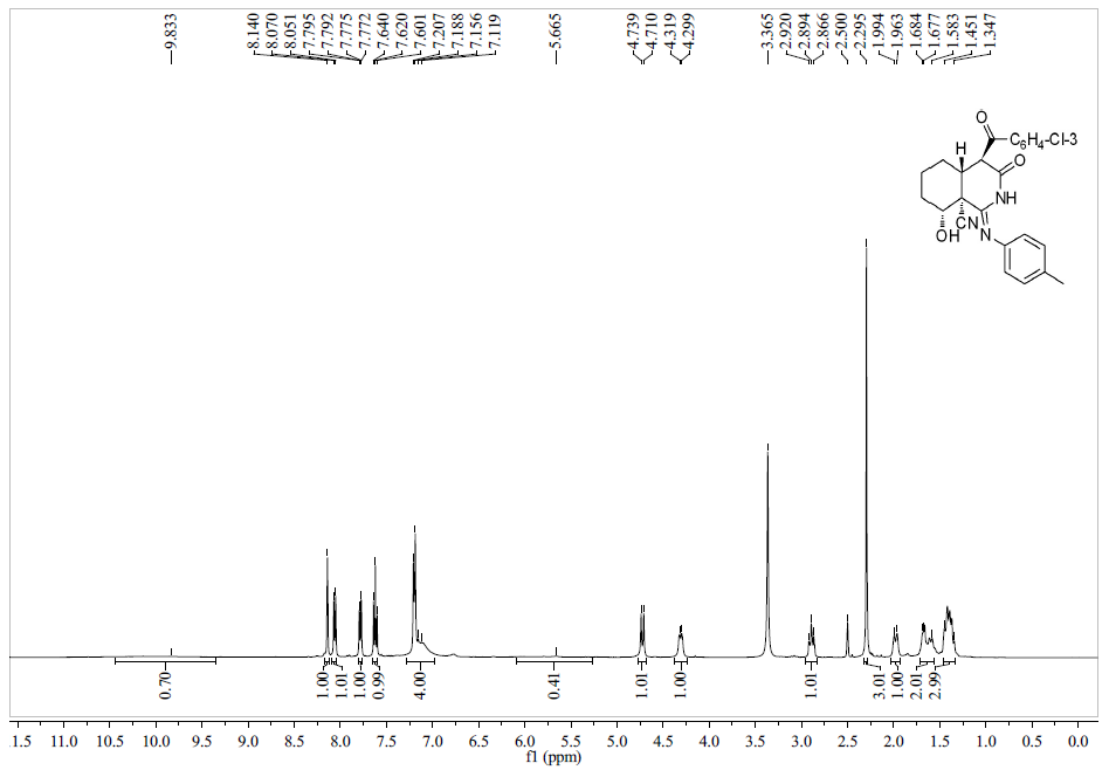

### <sup>13</sup>C NMR of compound 4t

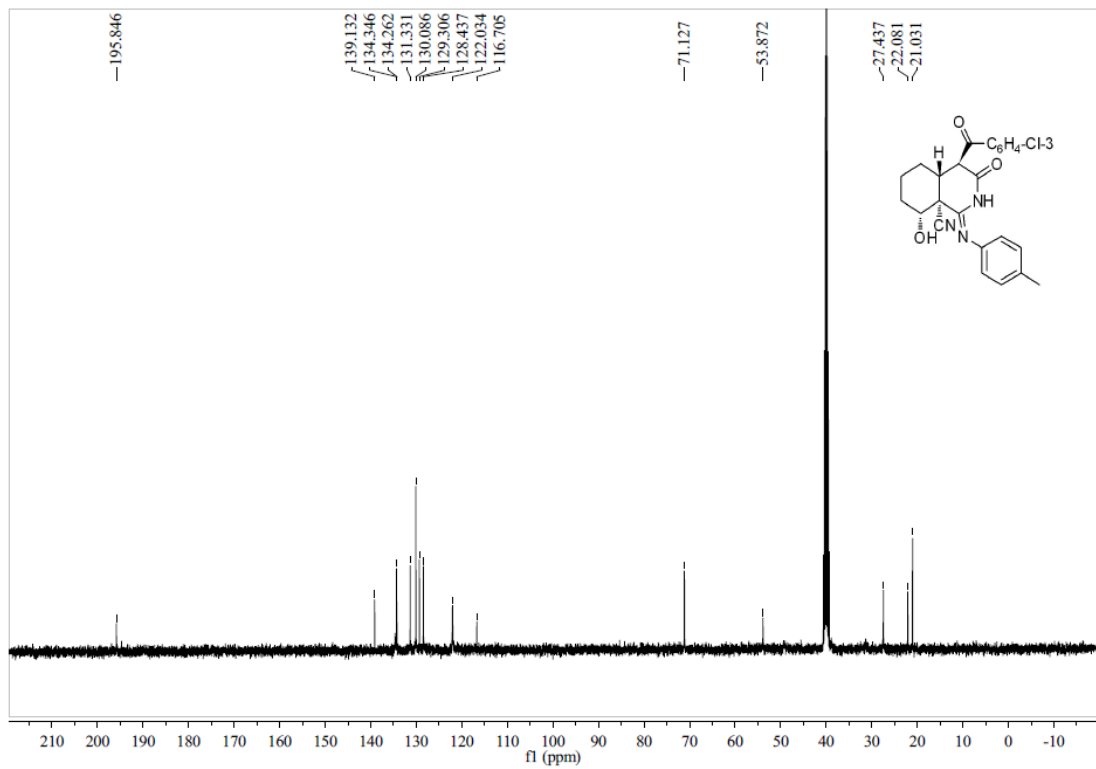

### $^1\text{H}$ NMR of compound **5a**

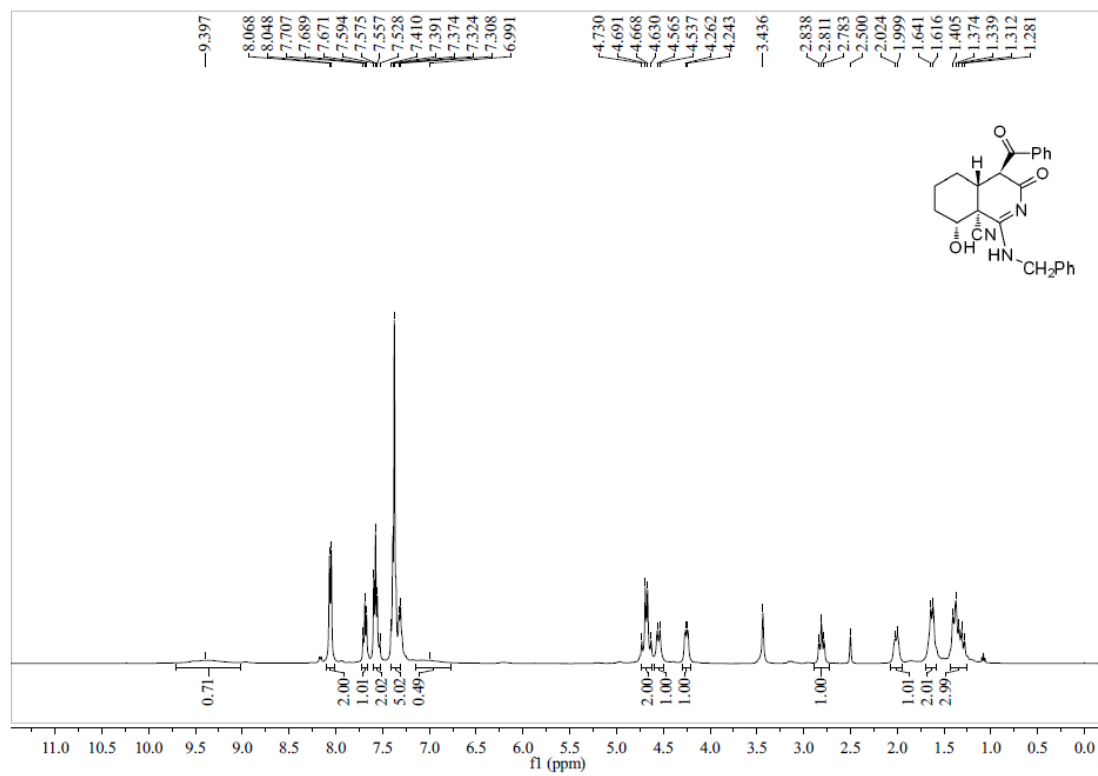

### $^{13}\text{C}$ NMR of compound **5a**

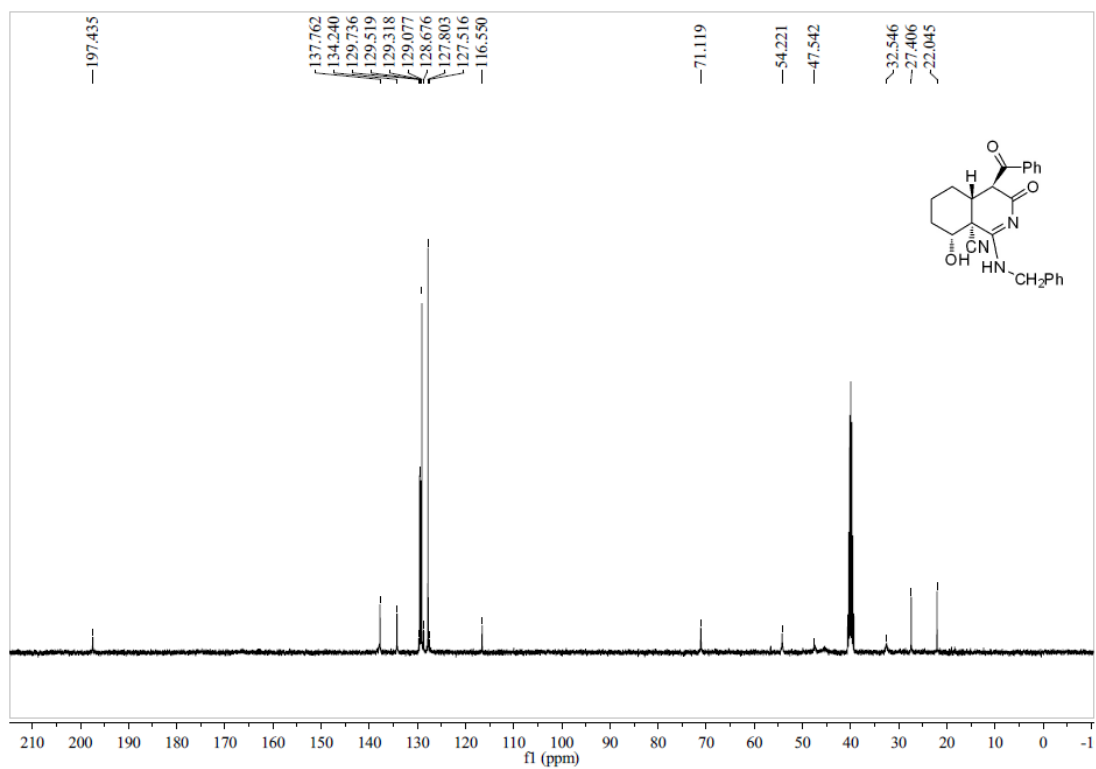

### <sup>1</sup>H NMR of compound **5b**

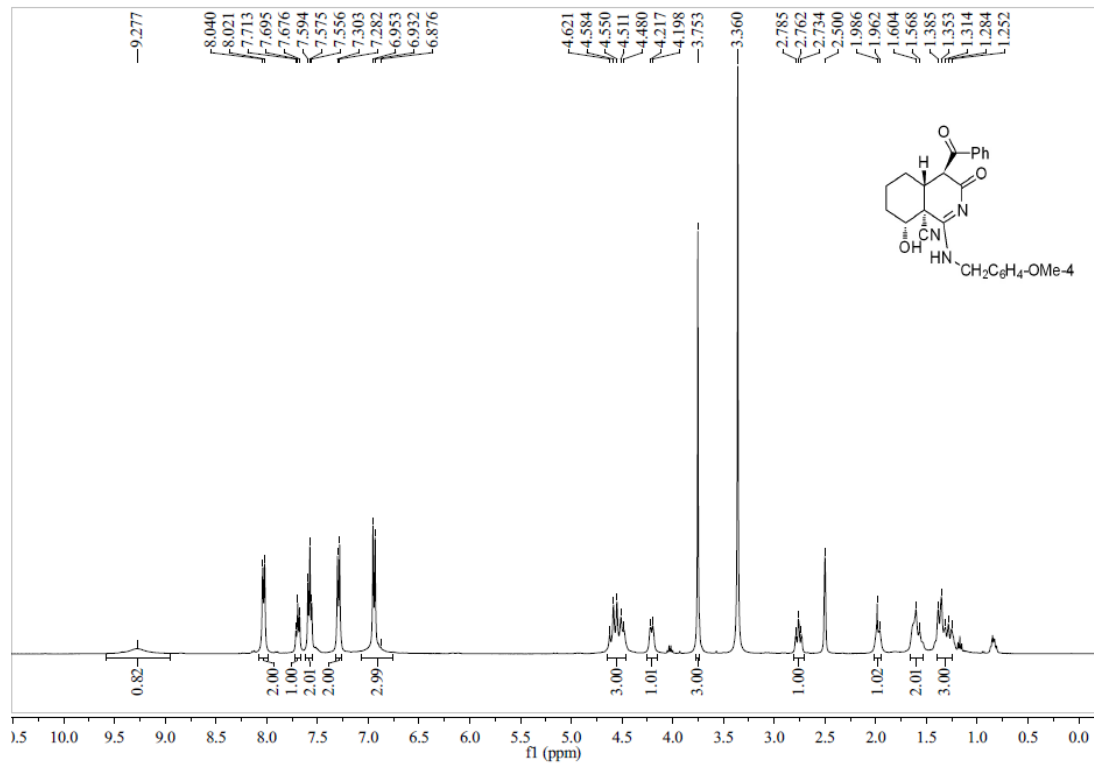

### <sup>13</sup>C NMR of compound **5b**

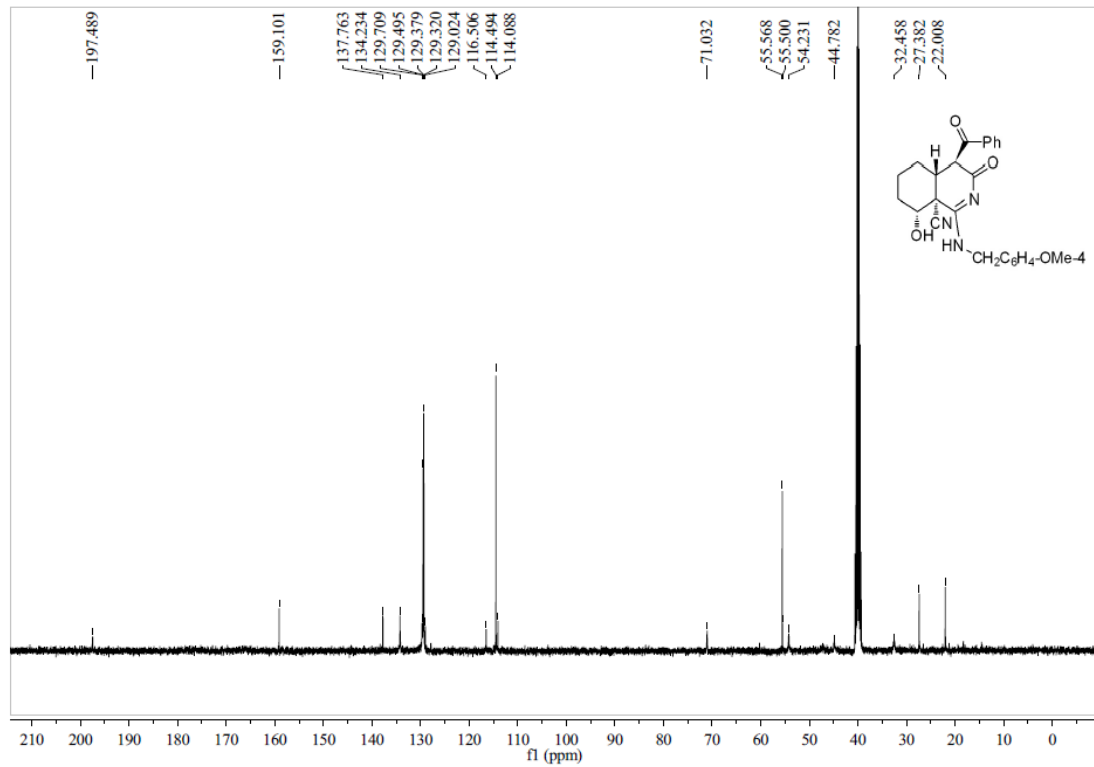

### $^1\text{H}$ NMR of compound **5c**

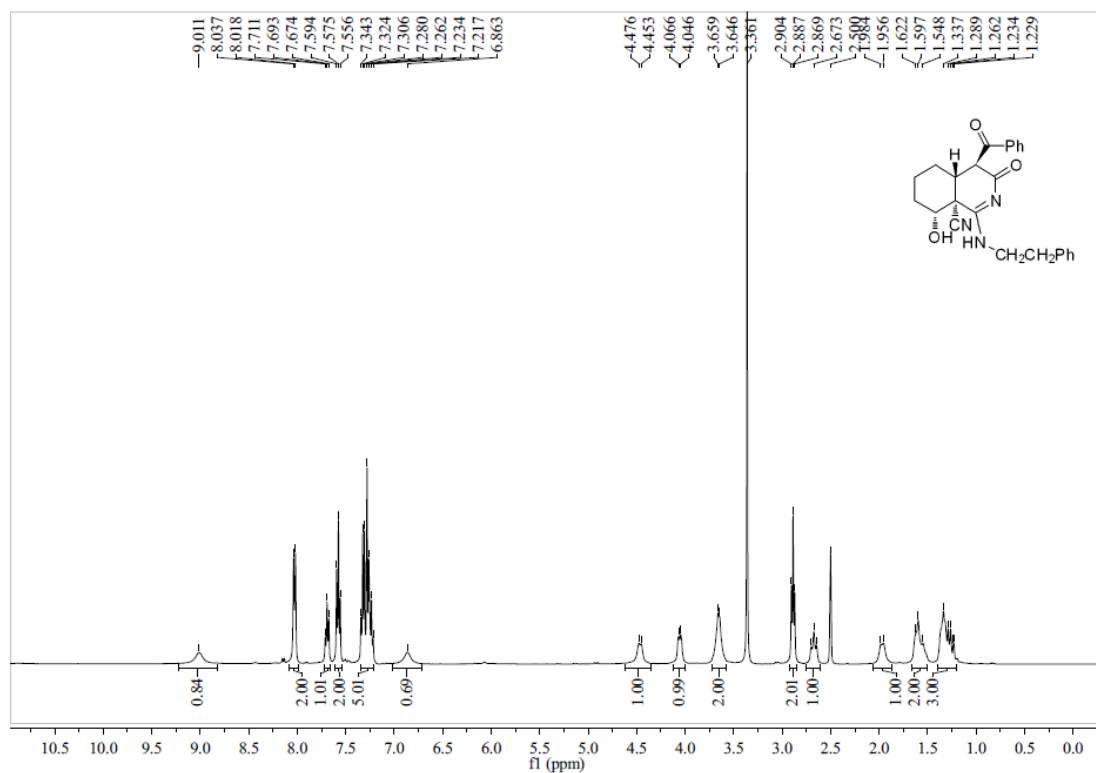

### $^{13}\text{C}$ NMR of compound **5c**

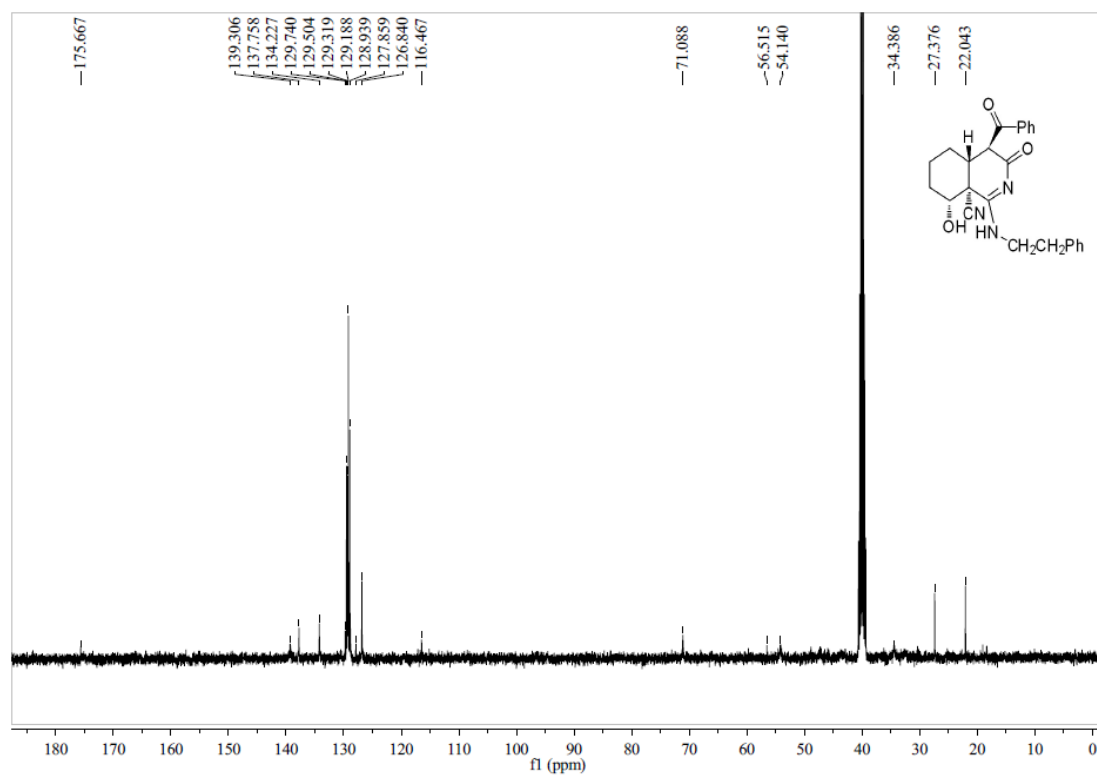

### $^1\text{H}$ NMR of compound **5d**

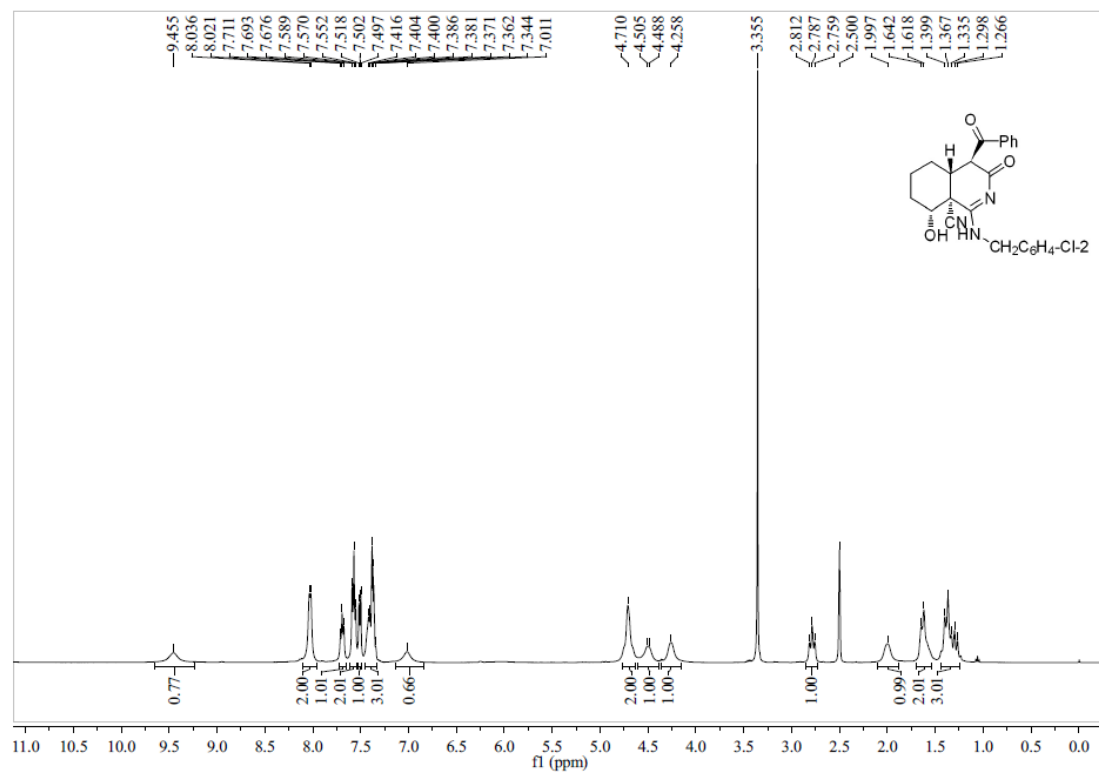

### $^{13}\text{C}$ NMR of compound **5d**

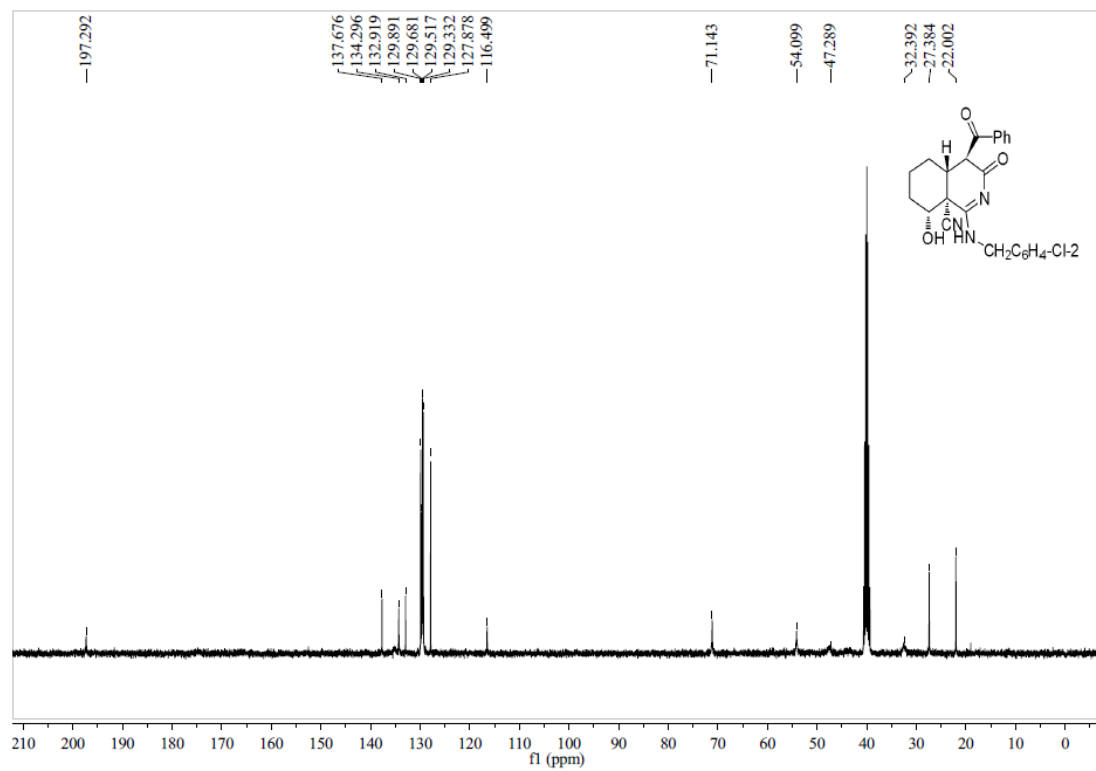

### <sup>1</sup>H NMR of compound **5e**

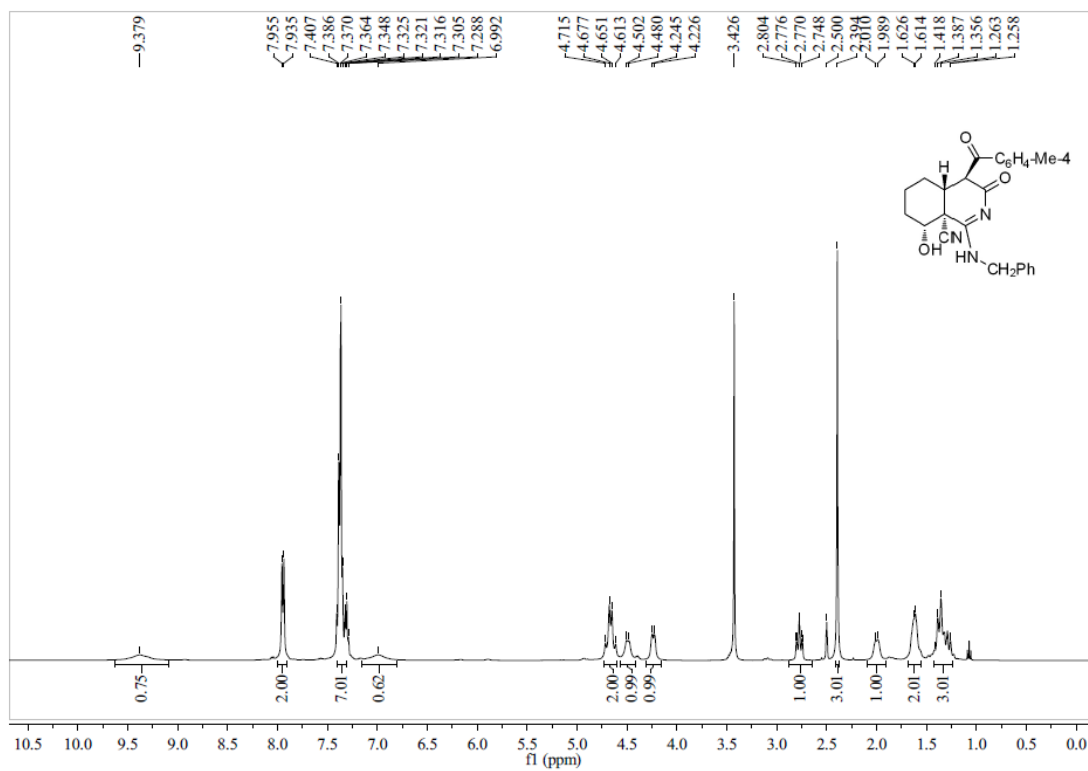

### <sup>13</sup>C NMR of compound **5e**

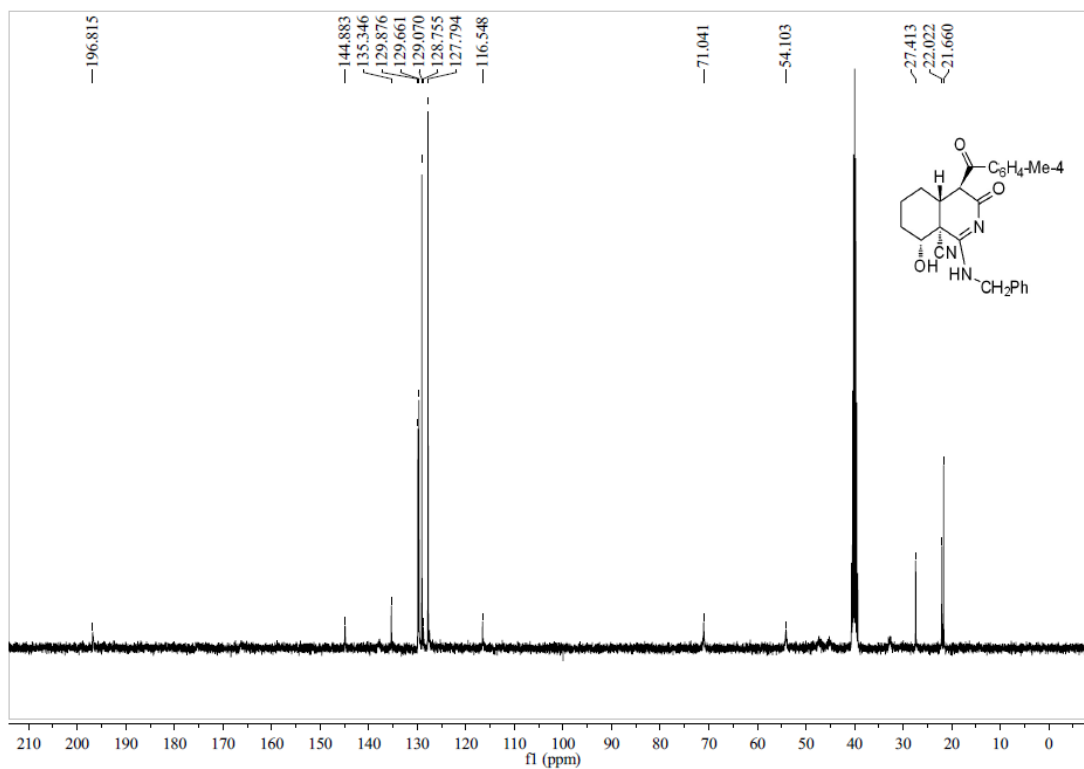

<sup>1</sup>H NMR of compound **5f**

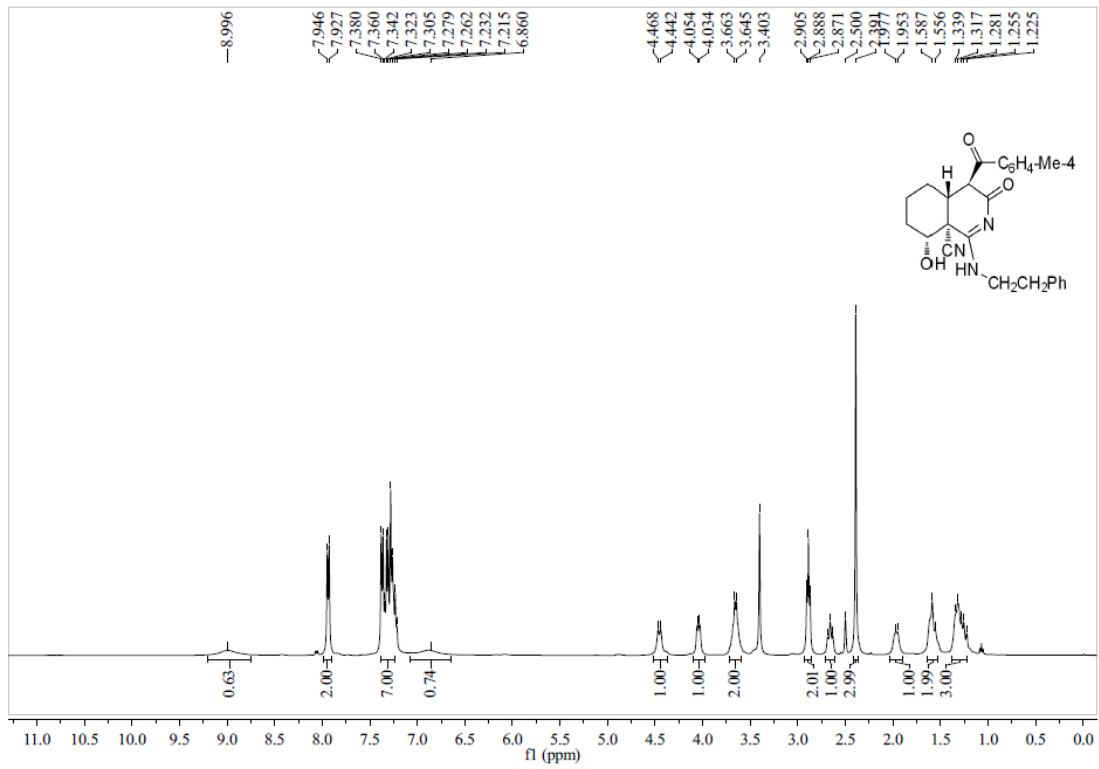

<sup>13</sup>C NMR of compound **5f**

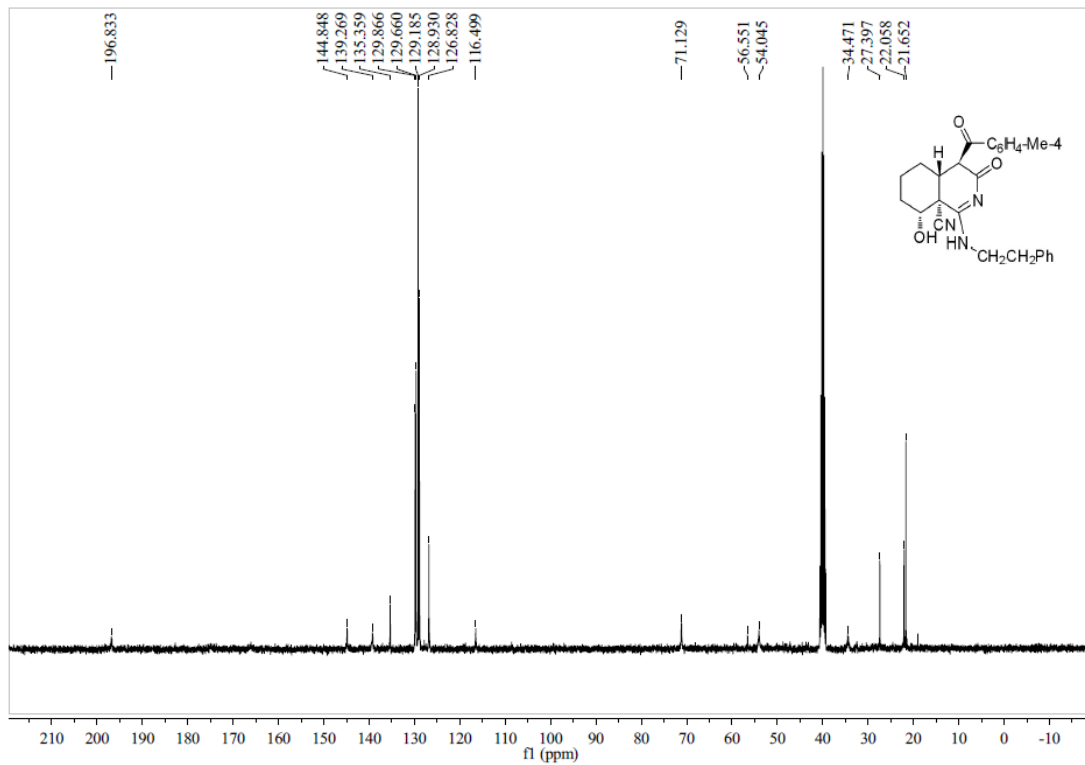



### $^1\text{H}$ NMR of compound **5g**

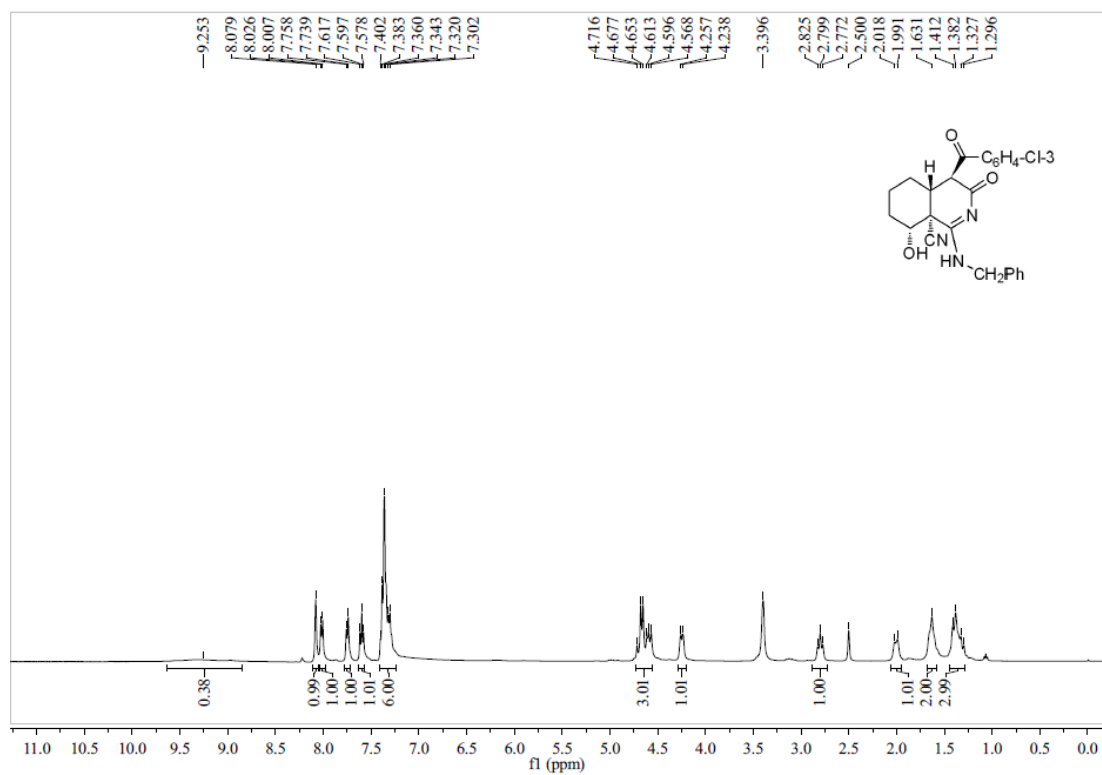

### $^{13}\text{C}$ NMR of compound **5g**

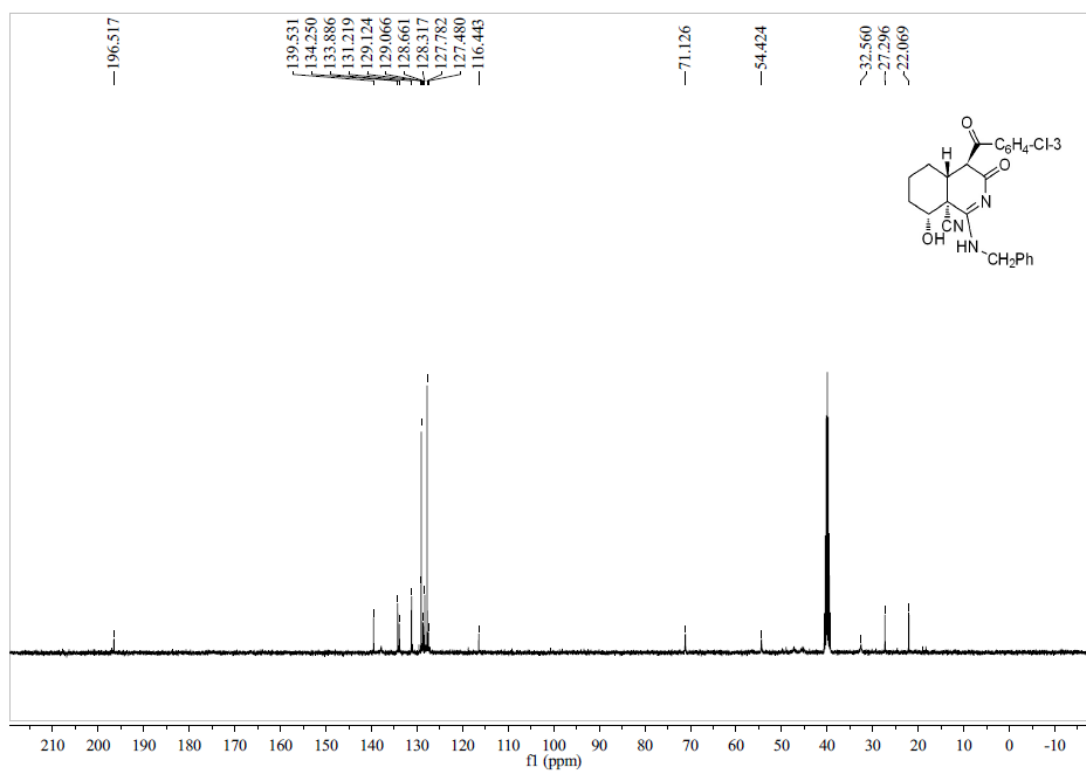

### <sup>1</sup>H NMR of compound **5h**

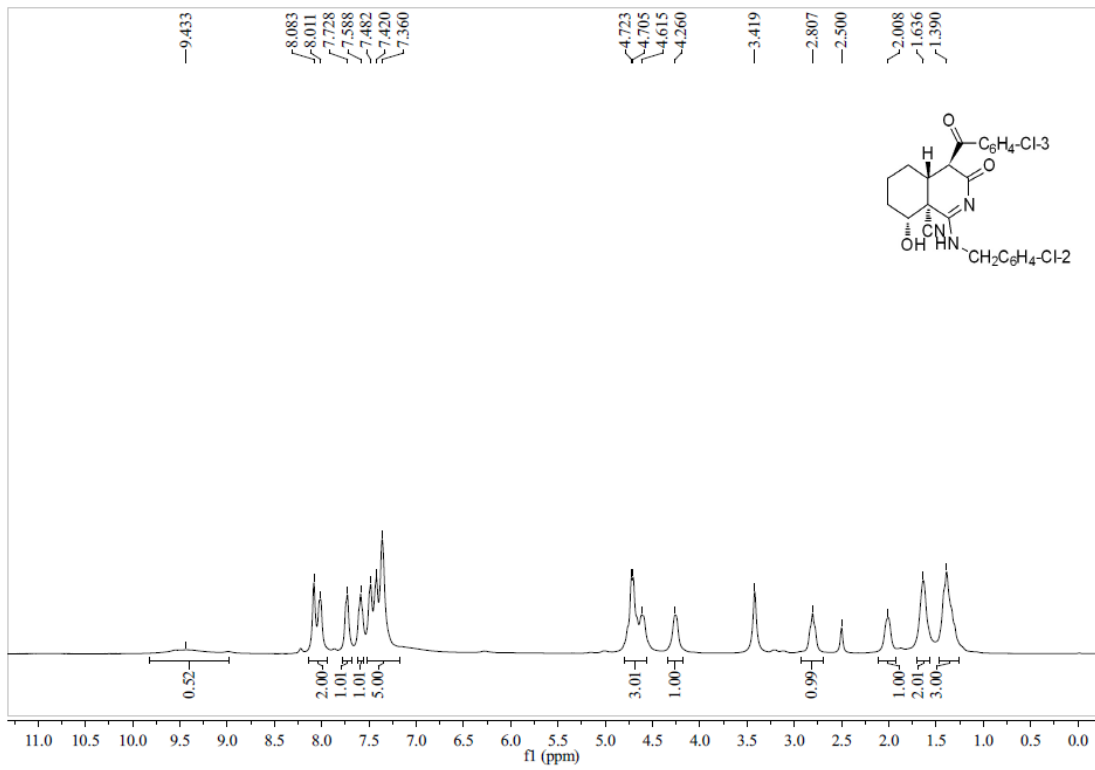

### <sup>13</sup>C NMR of compound **5h**

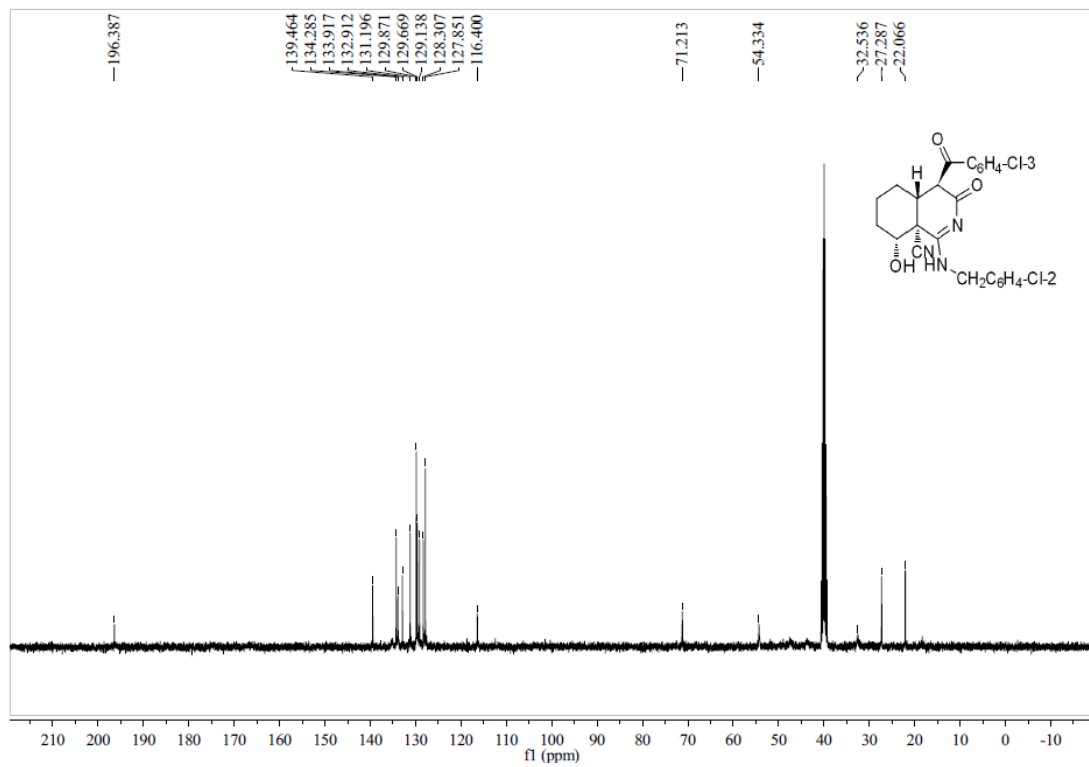

Supplement: c4cc08900f1.pdf [file c4cc08900f1.pdf]
